# Supplementary material
Source: PubMed Central journal article supplement (PMC4995142)
Supplement: NIHMS800474-supplement-supp_info.pdf [file NIHMS800474-supplement-supp_info.pdf]

## Supplementary Information

### Supplementary Note 1. Characterization of WS cognitive and social profile in five WS participants

Participants were characterized with respect to their WS cognitive (WSCP) and social (WSSP) profiles<sup>61-63</sup> to evaluate the degree to which each individual demonstrated the distinct pattern of strengths and weaknesses associated with the WS phenotype. A core characteristic of the WSCP is the dissociation between relative strengths in socially relevant cognition (e.g., face processing and language)<sup>62</sup> and severely impaired visuospatial cognition<sup>64</sup>. Further, the full-scale IQ profile is characterized by mild-to-moderate intellectual disability (mean of 50-60)<sup>65</sup>, masking relatively superior processing of verbal over non-verbal information (see **Extended Data Fig. 1c** for summary of test battery used in this study).

The WSCPs for the five participants were constructed by calculating log predictive likelihood ratios under assumed normality for age-appropriate TD vs. WS classifications based on VIQ, PIQ, VMI and PPVT standard scores, subject to availability. In the present study (**Extended Data Fig. 1d**), values greater than zero indicate performance more consistent with expectations for TD participants whereas values less than zero indicate performance more consistent with expectation for WS participants. Predictive distributions for the TD participants were based on published normative means and SDs for each of the tests employed, whereas for the WS classification, the predictive distributions<sup>26</sup> were determined using data from  $n = 81$  (VIQ and PIQ),  $n = 56$  (VMI), and  $n = 97$  (PPVT) subjects in a broader WS sample (**Extended Data Fig. 1e**). A Tobit model was used to estimate parameters for WS subjects on the VMI due to the presence of floor effects.

Although the scores of the four individuals with typical WS were more consistent with the WSCP than with normative TD performance, WS25, WS77, and pWS88 tested within the normal range on VIQ. However, as indicated by the uniformly poor performance on the VMI in the WS participants, the pronounced and disproportionate visuospatial processing deficits that constitute the defining feature of the WSCP were present even in the WS participants with high VIQ. In contrast, the performance of pWS88 on the VMI was more consistent with normative expectations under the TD classification and was commensurate with his performance on the IQ tests and on the PPVT. To enable comparison with behavior from a broader sample of WS and TD participants, data points from the five participants were reported in relation to those observed in a larger WS population.

Further evaluation of the WS sample focused on the dissociation within the WSCP characterized by visual-spatial perception deficit but with near typical face identification ability<sup>62, 64</sup>. Consistent with this profile, three typical WS participants fit well in the larger WS sample (WS17 could not complete this portion of testing), demonstrating severely impaired performance on the Judgment of Line Orientation (JLO) task (TD  $n = 22$  vs. WS  $n = 65$ , AUC = 0.994,  $p < 0.001$ ) contrasted with performance on the Benton Facial Recognition task (BFRT) that was indistinguishable from that of TD controls ( $t = 1.727$ ,  $df = 82$ ,  $p < 0.088$ ) (**Fig. 1b** and **Extended Data Fig. 1f**). Participant pWS88 performed comparable to those with WS and TD on the BFRT, but his score on the JLO fell in between those of the WS and TD groups (**Fig. 1b**). The performance of the WS and TD participants on these tasks, along with the data points for the five participants, is displayed in **Figure 1b**.

Cognitive functions with social relevance are relatively spared in the WSCP, as demonstrated above. Consistent with this notion, a hallmark of WS is a hypersocial predisposition<sup>62, 66</sup>, associated with elevated approach toward strangers, bias toward positive emotion and a reduction in response to fear and anger<sup>67, 68</sup>, atypically expressive and relatively sophisticated verbal output, and an increased interest in processing faces and eyes<sup>62, 69</sup>. Empirical work building a WS personality profile (WSPP) has shown that personality features such as a lack of shyness, high empathy, and gregariousness, in addition to the qualities of people-oriented, visible, tense, sensitive/anxious predisposition, discriminate individuals with WS from those without the syndrome<sup>70</sup>.

The WSSPs for the five participants were constructed using measures of social approach behavior, emotionality/empathy, and language use. The Salk Institute Sociability Questionnaire (SISQ), completed by participants' parents, confirmed that this hypersociability was limited to individuals with the typical deletion in the WBSCR<sup>62, 66</sup>. A larger cohort of participants with WS (n = 101, for Approach Strangers and n = 100, for Social-emotional/empathic Behavior) were previously characterized not only by significantly elevated scores of approachability toward strangers (AUC = 0.916, p < 0.001) but also by increased social-emotional/empathic behaviors (AUC = 0.777, p < 0.001) as compared to TD individuals (n = 80, for Approach Strangers and n = 79, for Social-emotional/empathic behavior) (**Fig. 1c**). The scores of pWS88 on the Approach Strangers and Social-emotional subscales fell in between those of the WS and TD groups. Another prominent feature of the unusual social phenotype of WS is that the characteristic hypersociability penetrates the language use of such individuals. Despite the fact that children with WS commonly show significant delays in acquiring expressive language, they use language excessively for social purposes. Whereas the WS group used significantly more socially evaluative language compared to TD individuals (n=49) (AUC

= 0.866,  $p < 0.001$ ; WS  $n=44$ ), the TD individuals made more frequent use of cognitively evaluative language (AUC = 0.698,  $p < 0.001$ ; WS  $n=45$ ) and complex language structure (AUC = 0.832,  $p < 0.001$ ; WS  $n=45$ ) and made fewer syntactic errors (AUC = 0.883,  $p < 0.001$ ; WS  $n=45$ ) than their counterparts with WS (**Extended Data Fig. 1g**). Thus, despite compromised basic language function in the WS patients, they exhibited an unusually abundant social use of language, conveyed linguistically by attributing emotions or motivations to characters when telling the story, building suspense, and maintaining audience involvement and interest using emphatics, intensifiers, character speech, direct quotes, and sound effects. In sum, the classic WS gene deletion results in a complex, uneven pattern of behaviors across both neurocognitive and social domains, ranging from excessive to normal to maladaptive, thereby offering an appealing model system for linking genes to specific phenotypic features.

**Supplementary Table 1. Summary of cell lines used in each experiment (iPSCs, iPSC-derived NPCs and neurons).**

| Experiments                                          | TD55 |    |     | TD59 |     |    | TD63 |    |     | TD70 |      |    | WS17 |     |    | WS25 |    |     | WS77 |     |    | WS79 |    |    | pWS88 |    |    |     |     |   |
|------------------------------------------------------|------|----|-----|------|-----|----|------|----|-----|------|------|----|------|-----|----|------|----|-----|------|-----|----|------|----|----|-------|----|----|-----|-----|---|
|                                                      | c5   | c6 | c15 | c1   | c2  | c4 | c1   | c3 | c6  | c2   | c4   | c5 | c1   | c2  | c4 | c1   | c3 | c4  | c1   | c4  | c5 | c2   | c3 | c5 | c0    | c1 | c2 | c15 | c18 |   |
| <b>iPSC characterization</b>                         |      |    |     |      |     |    |      |    |     |      |      |    |      |     |    |      |    |     |      |     |    |      |    |    |       |    |    |     |     |   |
| Immunostaining                                       | Y    | Y  | Y   | Y    | Y   | Y  | Y    | Y  | Y   | Y    | Y    | Y  | Y    | Y   | Y  | Y    | Y  | Y   | Y    | Y   | Y  | Y    | Y  | Y  | Y     | Y  | Y  | Y   | Y   | Y |
| Semi-qPCR                                            | Y    | Y  | Y   | Y    | Y   | Y  | Y    | Y  | Y   | Y    | Y    | Y  | Y    | Y   | Y  | Y    | Y  | Y   | Y    | Y   | Y  | Y    | Y  | Y  | Y     | Y  | Y  | Y   | Y   | Y |
| Teratoma assay                                       | Y    |    |     |      |     |    |      |    |     |      |      |    |      |     |    |      |    | Y   |      |     |    |      |    |    | Y     |    |    |     |     |   |
| Karyotyping                                          | Y    |    | Y   |      | Y   |    | Y    |    |     |      | Y    |    |      | Y   |    |      | Y  |     |      | Y   | Y  |      |    | Y  |       |    |    |     |     |   |
| Microarray                                           |      |    |     |      | Y   |    | Y    |    |     |      | Y    |    | Y    |     |    |      |    | Y   |      |     | Y  |      |    |    | Y     |    |    |     |     |   |
| Genotyping (SNP array)                               |      | Y  |     | Y    | Y   |    | Y    | Y  |     | Y    | Y    |    | Y    | Y   |    | Y    | Y  |     |      | Y   | Y  |      |    |    | Y     | Y  | Y  |     |     |   |
| RNA sequencing                                       |      | Y  |     | Y    |     |    | Y    |    |     |      | Y    |    | Y    |     |    | Y    |    |     |      | Y   | Y  |      |    |    | Y     |    |    |     |     |   |
| Exogenous retroviral genes                           |      | Y  |     | Y    |     |    | Y    |    |     |      | Y    |    | Y    |     |    | Y    |    |     |      | Y   | Y  |      |    |    | Y     |    |    |     | Y   |   |
| <b>NPC characterization</b>                          |      |    |     |      |     |    |      |    |     |      |      |    |      |     |    |      |    |     |      |     |    |      |    |    |       |    |    |     |     |   |
| Immunostaining                                       | Y    | Y  | Y   | Y    | Y   | Y  | Y    | Y  | Y   | Y    | Y    | Y  | Y    | Y   | Y  | Y    | Y  | Y   | Y    | Y   | Y  | Y    | Y  | Y  | Y     | Y  | Y  | Y   | Y   | Y |
| qPCR                                                 | Y    |    |     | Y    | Y   |    | Y    |    |     |      | Y    |    | Y    |     |    | Y    |    | Y   |      | Y   | Y  |      |    | Y  |       |    |    |     |     |   |
| RNA sequencing                                       |      | Y  |     | Y    |     |    | Y    |    |     |      | Y    |    | Y    |     |    | Y    |    |     |      | Y   |    |      | Y  |    |       | Y  | Y  |     |     |   |
| NPC flow characterization                            |      | Y  |     | Y    | Y   |    | Y    |    |     |      | Y    |    | Y    |     |    |      |    |     |      | Y   |    |      | Y  | Y  |       | Y  | Y  |     |     |   |
| <b>NPC proliferation and apoptosis</b>               |      |    |     |      |     |    |      |    |     |      |      |    |      |     |    |      |    |     |      |     |    |      |    |    |       |    |    |     |     |   |
| Cell counting (day4/day0) (technical replicates)     | 2    | 2  | 2   | 2    | 3   |    | 2    | 2  | 2   | 2    | 2    |    | 2    | 2   |    | 3    | 3  | 5   | 2    | 3   | 2  | 2    | 2  |    | 3     | 5  | 3  | 3   | 2   |   |
| Proliferation (BrdU labeling) (technical replicates) |      | 3  |     | 3    | 3   |    | 4    |    |     |      | 3    |    | 3    |     |    | 3    |    | 3   |      |     | 3  |      |    |    | 3     | 3  | 3  |     |     |   |
| DNA fragmentation (PI) (technical replicates)        |      | 4  |     |      |     |    | 3    |    |     |      | 3    |    | 3    |     |    | 2    | 3  |     |      |     | 3  |      |    |    | 3     | 3  | 3  |     |     |   |
| Caspase activity (Caspase3) (technical replicates)   |      | 3  |     | 4    |     |    | 3    |    |     |      | 3    |    | 3    |     |    | 3    | 1  | 3   |      |     | 3  |      |    |    | 3     | 3  | 3  |     |     |   |
| <b>FZD9 experiment</b>                               |      |    |     |      |     |    |      |    |     |      |      |    |      |     |    |      |    |     |      |     |    |      |    |    |       |    |    |     |     |   |
| <b>Knockdown &amp; overexpression</b>                |      |    |     |      |     |    |      |    |     |      |      |    |      |     |    |      |    |     |      |     |    |      |    |    |       |    |    |     |     |   |
| Western blot                                         | Y    |    |     | Y    |     |    | Y    |    |     |      | Y    |    | Y    |     | Y  |      |    |     |      | Y   |    | Y    |    |    | Y     | Y  |    |     |     |   |
| Cell counting (day4/day0) (technical replicates)     | 4    |    |     | 3    |     |    | 3    |    |     |      | 3    |    | 5    |     | 3  |      |    |     |      | 3   |    | 5    |    |    | 3     | 4  |    |     |     |   |
| DNA fragmentation (PI) (technical replicates)        | 4    |    |     |      |     |    | 3    |    |     |      | 3    |    | 3    |     |    | 3    |    |     |      |     | 3  |      |    |    | 3     | 3  | 3  |     |     |   |
| Caspase3 activity (technical replicates)             | 3    |    |     | 4    |     |    | 3    |    |     |      | 3    |    | 3    |     |    | 3    | 1  | 3   |      |     | 3  |      |    |    | 3     | 3  | 3  |     |     |   |
| Single-cell analysis                                 | Y    |    |     | Y    |     |    |      |    |     |      | Y    |    | Y    |     |    | Y    |    |     | Y    |     | Y  |      |    | Y  |       |    |    |     |     |   |
| <b>Neuronal characterization</b>                     |      |    |     |      |     |    |      |    |     |      |      |    |      |     |    |      |    |     |      |     |    |      |    |    |       |    |    |     |     |   |
| Immunostaining                                       | Y    | Y  | Y   | Y    | Y   | Y  | Y    | Y  | Y   | Y    | Y    | Y  | Y    | Y   | Y  | Y    | Y  | Y   | Y    | Y   | Y  | Y    | Y  | Y  | Y     | Y  | Y  | Y   | Y   |   |
| qPCR                                                 |      | Y  |     | Y    | Y   |    | Y    |    |     |      | Y    |    | Y    |     |    | Y    |    | Y   |      | Y   | Y  |      |    | Y  |       |    |    |     |     |   |
| RNA sequencing                                       |      | Y  |     | Y    |     |    | Y    |    |     |      | Y    |    | Y    |     |    | Y    |    | Y   |      | Y   |    |      | Y  |    |       |    |    | Y   |     |   |
| Electrophysiology (number of neurons)                |      |    | 1   |      |     | 2  | 4    |    |     |      | 3    |    |      |     |    |      |    |     |      | 2   | 5  | 10   |    |    |       |    |    |     |     |   |
| MEA                                                  |      |    |     | Y    |     |    |      |    |     |      | Y    | Y  |      | Y   | Y  |      |    |     |      |     |    |      | Y  |    |       |    |    |     |     |   |
| Morphometric analysis (number of neurons)            | 5    |    | 5   | 6    | 4   |    | 5    |    | 5   |      | 5    | 5  |      | 5   | 5  | 5    | 5  |     |      |     | 5  | 5    |    |    | 5     | 5  | 10 | 11  | 5   | 6 |
| Calcium transient (number of ROI)                    |      |    |     | 351  | 748 |    | 299  |    | 764 | 664  | 1387 |    | 1017 | 832 |    |      |    | 436 | 983  | 693 |    | 485  |    |    |       | 36 | 12 |     |     |   |
| Neurite dynamics                                     | Y    |    |     | Y    |     |    | Y    |    |     |      | Y    |    | Y    |     | Y  |      |    |     |      | Y   |    |      | Y  |    |       | Y  | Y  |     |     |   |
| Puncta                                               | Y    | Y  |     | Y    | Y   |    | Y    |    |     | Y    | Y    |    | Y    | Y   | Y  |      |    |     |      | Y   | Y  | Y    | Y  | Y  | Y     | Y  |    |     |     |   |
| Single-cell analysis                                 |      | Y  |     | Y    |     |    |      |    |     |      | Y    |    | Y    |     |    | Y    |    |     |      | Y   |    |      | Y  |    |       | Y  |    |     |     |   |

c#; clone number. Y; specified clone was used for specified experiments (n=technical replicates). PI; propidium iodide. ROI; region of interest.

**Supplementary Table 2. Per sample CNV detected in iPSCs of TD, WS and pWS88.**

| Sample  | Chromosome | Start     | End       | Total SNPs | CNV length | Zigosity     | Type        | Start SNP       | End SNP       | Involved genes                                                                                                   |
|---------|------------|-----------|-----------|------------|------------|--------------|-------------|-----------------|---------------|------------------------------------------------------------------------------------------------------------------|
| TD70 c4 | chr7       | 1552438   | 1602673   | 10         | 50236      | Heterozygous | Deletion    | rs6965558       | rs2033572     | MAFK,TMEM184A                                                                                                    |
| TD70 c4 | chr12      | 31997981  | 32034552  | 10         | 36572      | Heterozygous | Duplication | rs2186010       | rs1666224     | -                                                                                                                |
| TD70 c4 | chr13      | 41383712  | 41494967  | 10         | 111256     | Heterozygous | Duplication | newsrs121908535 | rs12857052    | MIR621,SLC25A15,SUGT1P3,TPTE2P5                                                                                  |
| TD70 c4 | chr21      | 46840233  | 46872167  | 27         | 31935      | Heterozygous | Deletion    | kgp23271266     | rs2183590     | COL18A1,COL18A1-AS1                                                                                              |
| TD70 c4 | chr20      | 61867454  | 61910352  | 10         | 42899      | Heterozygous | Deletion    | rs6011691       | variant.69149 | ARFGAP1,BIRC7,FLJ16779,MIR3196,NKAIN4                                                                            |
| TD70 c4 | chr17      | 80693128  | 80788492  | 11         | 95365      | Heterozygous | Deletion    | rs3859206       | rs12948179    | FN3K,TBCD,ZNF750                                                                                                 |
| TD70 c4 | chr16      | 89121918  | 89261482  | 15         | 139565     | Heterozygous | Deletion    | rs12933802      | rs2270416     | ACSF3,CDH15,LINC00304,LOC400558                                                                                  |
| TD70 c4 | chr16      | 90079534  | 90110027  | 10         | 30494      | Heterozygous | Deletion    | rs8059973       | rs3743824     | DBNDD1,GAS8,GAS8-AS1,URAHP                                                                                       |
| TD70 c4 | chr2       | 96150959  | 96580165  | 14         | 429207     | Heterozygous | Duplication | kgp225262       | kgp8598162    | LINC00342,TRIM43                                                                                                 |
| TD70 c4 | chr14      | 105752404 | 105909527 | 11         | 157124     | Heterozygous | Deletion    | rs3825762       | rs4983625     | BRF1,LOC100507437,MTA1,PACS2,TEX22                                                                               |
| TD70 c4 | chr12      | 133751427 | 133781051 | 21         | 29625      | Heterozygous | Deletion    | rs11147274      | indel.28499   | ZNF268                                                                                                           |
| TD70 c4 | chr9       | 139401504 | 139518965 | 11         | 117462     | Heterozygous | Deletion    | rs3124596       | rs7863705     | LINC01573,MIR4673,MIR4674,NOTCH1                                                                                 |
| TD70 c5 | chr11      | 763457    | 899367    | 19         | 135911     | Heterozygous | Deletion    | newsrs151052416 | variant.15710 | CD151,CEND1,CHID1,CRACR2B,LOC171391,PA<br>NO1,PDCC1,PIDD1,PNPLA2,POLR2L,RPLP2,SLC<br>25A22,SNORA52,TALDO1,TSPAN4 |
| TD70 c5 | chr7       | 1552438   | 1606847   | 12         | 54410      | Heterozygous | Deletion    | rs6965558       | rs10244477    | MAFK,TMEM184A                                                                                                    |
| TD70 c5 | chr19      | 8566880   | 8651562   | 11         | 84683      | Heterozygous | Deletion    | rs10403336      | rs4476282     | ADAMTS10,MYO1F,PRAM1,ZNF414                                                                                      |
| TD70 c5 | chr17      | 20217122  | 20527718  | 10         | 310597     | Heterozygous | Deletion    | rs7209889       | rs1382779     | CCDC144CP,CDRT15L2,FAM106B,KRT16P3,LGA<br>LS9B,SPECC1                                                            |
| TD70 c5 | chr17      | 30262169  | 30454720  | 12         | 192552     | Heterozygous | Duplication | rs7210970       | rs9909295     | LRRC37B,SH3GL1P1,SUZ12                                                                                           |
| TD70 c5 | chr12      | 31997981  | 32056577  | 14         | 58597      | Heterozygous | Duplication | rs2186010       | rs7298353     | -                                                                                                                |
| TD70 c5 | chr12      | 37986081  | 38361657  | 15         | 375577     | Heterozygous | Deletion    | rs1842599       | rs1607882     | -                                                                                                                |
| TD70 c5 | chr13      | 41383712  | 41494967  | 10         | 111256     | Heterozygous | Duplication | newsrs121908535 | rs12857052    | MIR621,SLC25A15,SUGT1P3,TPTE2P5                                                                                  |
| TD70 c5 | chr21      | 46840233  | 46872167  | 27         | 31935      | Heterozygous | Deletion    | kgp23271266     | rs2183590     | COL18A1,COL18A1-AS1                                                                                              |
| TD70 c5 | chr20      | 61867454  | 61910352  | 10         | 42899      | Heterozygous | Deletion    | rs6011691       | variant.69149 | ARFGAP1,BIRC7,FLJ16779,MIR3196,NKAIN4                                                                            |
| TD70 c5 | chr12      | 78880444  | 78965788  | 10         | 85345      | Heterozygous | Deletion    | rs12315707      | rs10778053    | -                                                                                                                |
| TD70 c5 | chr17      | 80693128  | 80791469  | 12         | 98342      | Heterozygous | Deletion    | rs3859206       | rs9906115     | FN3K,TBCD,ZNF750                                                                                                 |
| TD70 c5 | chr16      | 89121918  | 89261482  | 15         | 139565     | Heterozygous | Deletion    | rs12933802      | rs2270416     | ACSF3,CDH15,LINC00304,LOC400558                                                                                  |
| TD70 c5 | chr16      | 90079534  | 90110027  | 10         | 30494      | Heterozygous | Deletion    | rs8059973       | rs3743824     | DBNDD1,GAS8,GAS8-AS1,URAHP                                                                                       |
| TD70 c5 | chr2       | 96150959  | 96580165  | 14         | 429207     | Heterozygous | Duplication | kgp225262       | kgp8598162    | LINC00342,TRIM43                                                                                                 |
| TD70 c5 | chr12      | 114524221 | 114666099 | 25         | 141879     | Heterozygous | Deletion    | rs1458704       | rs2555009     | -                                                                                                                |
| TD70 c5 | chr9       | 136536633 | 136599146 | 11         | 62514      | Heterozygous | Deletion    | rs2797840       | rs573904      | SARDH                                                                                                            |
| TD70 c5 | chr9       | 139401504 | 139518965 | 11         | 117462     | Heterozygous | Deletion    | rs3124596       | rs7863705     | LINC01573,MIR4673,MIR4674,NOTCH1                                                                                 |
| TD59 c2 | chr9       | 512589    | 557617    | 10         | 45029      | Heterozygous | Duplication | rs1410968       | rs3739592     | KANK1                                                                                                            |
| TD59 c2 | chr22      | 19945177  | 19958811  | 25         | 13635      | Heterozygous | Deletion    | rs740603        | kgp9453935    | ARVCF,COMT,MIR4761                                                                                               |
| TD59 c2 | chr12      | 31997981  | 32056577  | 14         | 58597      | Heterozygous | Duplication | rs2186010       | rs7298353     | -                                                                                                                |

|         |       |           |           |    |        |              |             |                |               |                                                                                                                                                                                                                                                  |
|---------|-------|-----------|-----------|----|--------|--------------|-------------|----------------|---------------|--------------------------------------------------------------------------------------------------------------------------------------------------------------------------------------------------------------------------------------------------|
| TD59 c2 | chr21 | 46840233  | 46888469  | 32 | 48237  | Heterozygous | Deletion    | kgp23271266    | kgp13089681   | COL18A1,COL18A1-AS1                                                                                                                                                                                                                              |
| TD59 c2 | chr21 | 46932318  | 46952094  | 24 | 19777  | Heterozygous | Deletion    | kgp13108713    | rs914231      | COL18A1,SLC19A1                                                                                                                                                                                                                                  |
| TD59 c2 | chr20 | 61823158  | 61910352  | 13 | 87195  | Heterozygous | Deletion    | rs4809501      | variant.69149 | ARFGAP1,BIRC7,FLJ16779,MIR3196,NKAIN4,YT<br>HDF1                                                                                                                                                                                                 |
| TD59 c2 | chr17 | 80693128  | 80791469  | 12 | 98342  | Heterozygous | Deletion    | rs3859206      | rs9906115     | FN3K,TBCD,ZNF750                                                                                                                                                                                                                                 |
| TD59 c2 | chr16 | 89115822  | 89261482  | 16 | 145661 | Heterozygous | Deletion    | rs7198060      | rs2270416     | ACSF3,CDH15,LINC00304,LOC400558                                                                                                                                                                                                                  |
| TD59 c2 | chr9  | 137292505 | 137330242 | 19 | 37738  | Heterozygous | Deletion    | rs6537998      | kgp27254482   | RXRA                                                                                                                                                                                                                                             |
| TD59 c1 | chr9  | 512589    | 557617    | 10 | 45029  | Heterozygous | Duplication | rs1410968      | rs3739592     | KANK1                                                                                                                                                                                                                                            |
| TD59 c1 | chr9  | 843763    | 877871    | 15 | 34109  | Heterozygous | Duplication | rs4338164      | rs7875857     | DMRT1                                                                                                                                                                                                                                            |
| TD59 c1 | chr19 | 945013    | 1119019   | 39 | 174007 | Heterozygous | Deletion    | rs2238573      | rs2074920     | ABCA7,ARID3A,CNN2,GPX4,GRIN3B,HMHA1,NM<br>_001303499,NM_001303501,POLR2E,RNU6-<br>2,SBNO2,TMEM259,WDR18                                                                                                                                          |
| TD59 c1 | chr22 | 19945177  | 19957251  | 21 | 12075  | Heterozygous | Deletion    | rs740603       | kgp15052777   | COMT,MIR4761                                                                                                                                                                                                                                     |
| TD59 c1 | chr12 | 31997981  | 32056577  | 14 | 58597  | Heterozygous | Duplication | rs2186010      | rs7298353     | -                                                                                                                                                                                                                                                |
| TD59 c1 | chr21 | 46840233  | 46888469  | 32 | 48237  | Heterozygous | Deletion    | kgp23271266    | kgp13089681   | COL18A1,COL18A1-AS1                                                                                                                                                                                                                              |
| TD59 c1 | chr7  | 57621951  | 57934758  | 12 | 312808 | Heterozygous | Duplication | rs4556041      | kgp10491      | -                                                                                                                                                                                                                                                |
| TD59 c1 | chr20 | 60990075  | 61027854  | 13 | 37780  | Heterozygous | Deletion    | rs911078       | rs4925245     | RBBP8NL                                                                                                                                                                                                                                          |
| TD59 c1 | chr20 | 61823158  | 61910352  | 13 | 87195  | Heterozygous | Deletion    | rs4809501      | variant.69149 | ARFGAP1,BIRC7,FLJ16779,MIR3196,NKAIN4,YT<br>HDF1                                                                                                                                                                                                 |
| TD59 c1 | chr17 | 79145891  | 79218714  | 11 | 72824  | Heterozygous | Deletion    | rs2659046      | rs2659005     | AATK-AS1,C17orf89,CEP131,ENTHD2,SLC38A10                                                                                                                                                                                                         |
| TD59 c1 | chr17 | 80693128  | 80791469  | 12 | 98342  | Heterozygous | Deletion    | rs3859206      | rs9906115     | FN3K,TBCD,ZNF750                                                                                                                                                                                                                                 |
| TD59 c1 | chr16 | 89115822  | 89261482  | 16 | 145661 | Heterozygous | Deletion    | rs7198060      | rs2270416     | ACSF3,CDH15,LINC00304,LOC400558                                                                                                                                                                                                                  |
| TD59 c1 | chr9  | 119473765 | 119531310 | 13 | 57546  | Heterozygous | Deletion    | rs12352766     | rs7847485     | ASTN2                                                                                                                                                                                                                                            |
| TD59 c1 | chr4  | 132610422 | 132849871 | 10 | 239450 | Heterozygous | Duplication | rs350694       | kgp12241657   | LOC101927305                                                                                                                                                                                                                                     |
| TD63 c1 | chr16 | 538565    | 855717    | 32 | 317153 | Heterozygous | Deletion    | rs754295       | rs1005190     | C16orf13,CAPN15,CCDC78,CHTF18,FAM173A,FA<br>M195A,FBXL16,GNG13,HAGHL,JMJD8,LINC0023<br>5,METRN,MIR3176,MIR5587,MIR662,MSLN,NARF<br>L,NHLRC4,NM_001304799,PIGQ,PRR25,PRR35,<br>RAB11FIP3,RAB40C,RHBDL1,RHOT2,RPUSD1,S<br>TUB1,WDR24,WDR90,WFIKKN1 |
| TD63 c1 | chr19 | 3076808   | 3136845   | 10 | 60038  | Heterozygous | Deletion    | rs307712       | rs1465245     | GNA11,GNA15                                                                                                                                                                                                                                      |
| TD63 c1 | chr1  | 3592436   | 3651409   | 13 | 58974  | Heterozygous | Deletion    | rs3765703      | rs10910018    | TP73                                                                                                                                                                                                                                             |
| TD63 c1 | chr4  | 5677101   | 5826597   | 30 | 149497 | Heterozygous | Deletion    | rs13146518     | rs3774883     | CRMP1,EVC,EVC2                                                                                                                                                                                                                                   |
| TD63 c1 | chr17 | 19622643  | 19663747  | 25 | 41105  | Heterozygous | Deletion    | rs11656096     | rs8067794     | ALDH3A1                                                                                                                                                                                                                                          |
| TD63 c1 | chr12 | 38094338  | 38361657  | 12 | 267320 | Heterozygous | Deletion    | rs2204849      | rs1607882     | -                                                                                                                                                                                                                                                |
| TD63 c1 | chr13 | 41383712  | 41494967  | 10 | 111256 | Heterozygous | Duplication | newsr121908535 | rs12857052    | MIR621,SLC25A15,SUGT1P3,TPTE2P5                                                                                                                                                                                                                  |
| TD63 c1 | chr21 | 46840233  | 46915042  | 48 | 74810  | Heterozygous | Deletion    | kgp23271266    | rs2236475     | COL18A1,COL18A1-AS1,MIR6815                                                                                                                                                                                                                      |
| TD63 c1 | chr7  | 57621951  | 57934758  | 12 | 312808 | Heterozygous | Duplication | rs4556041      | kgp10491      | -                                                                                                                                                                                                                                                |
| TD63 c1 | chr6  | 63518796  | 63668515  | 15 | 149720 | Heterozygous | Deletion    | rs1155906      | rs6931035     | -                                                                                                                                                                                                                                                |
| TD63 c1 | chr1  | 80547435  | 80644813  | 10 | 97379  | Heterozygous | Deletion    | rs7545328      | rs7521092     | -                                                                                                                                                                                                                                                |
| TD63 c1 | chr17 | 80709062  | 80788492  | 10 | 79431  | Heterozygous | Deletion    | rs2451219      | rs12948179    | FN3K,TBCD,ZNF750                                                                                                                                                                                                                                 |
| TD63 c1 | chr16 | 87860674  | 87879522  | 37 | 18849  | Heterozygous | Deletion    | rs6540091      | rs997761      | MIR6775,SLC7A5                                                                                                                                                                                                                                   |
| TD63 c1 | chr10 | 135256762 | 135353499 | 32 | 96738  | Heterozygous | Duplication | rs2249421      | rs1952467     | CYP2E1,SCART1                                                                                                                                                                                                                                    |

|         |       |           |           |     |         |              |             |               |             |                                                                                                                                                                                   |
|---------|-------|-----------|-----------|-----|---------|--------------|-------------|---------------|-------------|-----------------------------------------------------------------------------------------------------------------------------------------------------------------------------------|
| TD63 c1 | chr6  | 152629586 | 152896974 | 51  | 267389  | Heterozygous | Duplication | rs9371581     | rs12528046  | SYNE1,SYNE1-AS1                                                                                                                                                                   |
| TD63 c1 | chr6  | 153173999 | 154269402 | 125 | 1095404 | Heterozygous | Duplication | rs9384046     | rs654359    | FBXO5,MIR7641-2,MTRF1L,RGS17                                                                                                                                                      |
| TD63 c3 | chr16 | 623238    | 855717    | 29  | 232480  | Heterozygous | Deletion    | rs4984895     | rs1005190   | C16orf13,CCDC78,CHTF18,FAM173A,FAM195A,FBXL16,GNNG13,HAGHL,JMJD8,METRN,MIR662,MSLN,NARFL,NM_001304799,PIGQ,PRR25,RAB40C,RHBDL1,RHOT2,RPUSD1,STUB1,WDR24,WDR90,WFIKKN1,GNA11,GNA15 |
| TD63 c3 | chr19 | 3076808   | 3136845   | 10  | 60038   | Heterozygous | Deletion    | rs307712      | rs1465245   | GNA11,GNA15                                                                                                                                                                       |
| TD63 c3 | chr1  | 3592436   | 3651409   | 13  | 58974   | Heterozygous | Deletion    | rs3765703     | rs10910018  | TP73                                                                                                                                                                              |
| TD63 c3 | chr17 | 19622643  | 19663747  | 25  | 41105   | Heterozygous | Deletion    | rs11656096    | rs8067794   | ALDH3A1                                                                                                                                                                           |
| TD63 c3 | chr12 | 38094338  | 38361657  | 12  | 267320  | Heterozygous | Deletion    | rs2204849     | rs1607882   | -                                                                                                                                                                                 |
| TD63 c3 | chr21 | 46750190  | 46806423  | 12  | 56234   | Heterozygous | Deletion    | rs1888534     | rs4819085   | LINC00316                                                                                                                                                                         |
| TD63 c3 | chr21 | 46840233  | 46888469  | 32  | 48237   | Heterozygous | Deletion    | kgp23271266   | kgp13089681 | COL18A1,COL18A1-AS1                                                                                                                                                               |
| TD63 c3 | chr7  | 57621951  | 57934758  | 12  | 312808  | Heterozygous | Duplication | rs4556041     | kgp10491    | -                                                                                                                                                                                 |
| TD63 c3 | chr16 | 77295830  | 77318571  | 11  | 22742   | Heterozygous | Deletion    | rs9927552     | rs1820253   | ADAMTS18                                                                                                                                                                          |
| TD63 c3 | chr17 | 80709062  | 80801745  | 12  | 92684   | Heterozygous | Deletion    | rs2451219     | rs7219521   | FN3K,TBCD,ZNF750                                                                                                                                                                  |
| TD63 c3 | chr16 | 87860674  | 87879522  | 37  | 18849   | Heterozygous | Deletion    | rs6540091     | rs997761    | MIR6775,SLC7A5                                                                                                                                                                    |
| TD63 c3 | chr4  | 132610422 | 132849871 | 10  | 239450  | Homozygous   | Duplication | rs350694      | kgp12241657 | LOC101927305                                                                                                                                                                      |
| TD63 c3 | chr10 | 135256762 | 135353499 | 32  | 96738   | Heterozygous | Duplication | rs2249421     | rs1952467   | CYP2E1,SCART1                                                                                                                                                                     |
| TD55 c6 | chr19 | 1388320   | 1481481   | 12  | 93162   | Heterozygous | Deletion    | rs7254913     | rs1047854   | APC2,C19orf25,DAZAP1,GAMT,NDUFS7,PCSK4,RPS15                                                                                                                                      |
| TD55 c6 | chr7  | 1507011   | 1602673   | 13  | 95663   | Heterozygous | Deletion    | rs6962610     | rs2033572   | INTS1,MAFK,TMEM184A                                                                                                                                                               |
| TD55 c6 | chr3  | 4041690   | 4145581   | 15  | 103892  | Heterozygous | Duplication | rs317544      | rs17039906  | -                                                                                                                                                                                 |
| TD55 c6 | chr3  | 4148058   | 4230956   | 13  | 82899   | Heterozygous | Deletion    | rs2600151     | rs2248840   | -                                                                                                                                                                                 |
| TD55 c6 | chr11 | 17352530  | 17429922  | 22  | 77393   | Heterozygous | Deletion    | variant.16921 | rs2106865   | ABCC8,KCNU11,NCR3LG1,NUCB2                                                                                                                                                        |
| TD55 c6 | chr22 | 18892575  | 18996565  | 19  | 103991  | Heterozygous | Duplication | rs2080346     | rs4431035   | DGCR5,DGCR6,PRODH                                                                                                                                                                 |
| TD55 c6 | chr17 | 19622643  | 19663747  | 25  | 41105   | Heterozygous | Deletion    | rs11656096    | rs8067794   | ALDH3A1                                                                                                                                                                           |
| TD55 c6 | chr6  | 31365707  | 31449022  | 31  | 83316   | Heterozygous | Deletion    | rs2523457     | rs2523650   | HCG26,HCP5,MICA                                                                                                                                                                   |
| TD55 c6 | chr14 | 44279080  | 44338004  | 10  | 58925   | Heterozygous | Deletion    | rs2182977     | rs10148581  | -                                                                                                                                                                                 |
| TD55 c6 | chr14 | 44344532  | 44844572  | 54  | 500041  | Heterozygous | Duplication | rs11847608    | rs1958500   | -                                                                                                                                                                                 |
| TD55 c6 | chr21 | 46859717  | 46982335  | 54  | 122619  | Heterozygous | Deletion    | rs9980531     | rs944422    | COL18A1,MIR6815,SLC19A1                                                                                                                                                           |
| TD55 c6 | chr14 | 47715509  | 47797402  | 10  | 81894   | Heterozygous | Deletion    | rs8020887     | rs1806787   | MDGA2                                                                                                                                                                             |
| TD55 c6 | chr19 | 53411448  | 53454298  | 13  | 42851   | Heterozygous | Duplication | rs7256400     | indel.57923 | ZNF321P,ZNF816,ZNF816-ZNF321P                                                                                                                                                     |
| TD55 c6 | chr7  | 62172732  | 62517629  | 12  | 344898  | Heterozygous | Deletion    | rs35557287    | rs2582705   | -                                                                                                                                                                                 |
| TD55 c6 | chr17 | 80693128  | 80791469  | 12  | 98342   | Heterozygous | Deletion    | rs3859206     | rs9906115   | FN3K,TBCD,ZNF750                                                                                                                                                                  |
| TD55 c6 | chr16 | 87860674  | 87885397  | 39  | 24724   | Heterozygous | Deletion    | rs6540091     | kgp16248988 | MIR6775,SLC7A5                                                                                                                                                                    |
| TD55 c6 | chr16 | 88761282  | 88812250  | 10  | 50969   | Heterozygous | Deletion    | rs7186861     | rs9788969   | CTU2,LOC100289580,LOC339059,MIR4722,PIEZ01,RNF166                                                                                                                                 |
| TD55 c6 | chr3  | 125452841 | 125620850 | 10  | 168010  | Heterozygous | Duplication | rs2947630     | rs9821905   | LOC101927056,MIR54811                                                                                                                                                             |
| TD55 c6 | chr8  | 145603114 | 145750506 | 11  | 147393  | Heterozygous | Deletion    | rs6599528     | rs9071      | ADCK5,CPSF1,CYHR1,FOXH1,GPT,KIFC2,LOC100287098,LRRRC14,LRRRC24,MFSD3,MIR6849,MIR6893,MIR939,PPP1R16A,RECQL4,SLC39A4,TONSL,VPS28                                                   |



|                |             |                 |                 |            |                |                     |                 |                    |                    |                                                                                                                                                                                                                                                          |
|----------------|-------------|-----------------|-----------------|------------|----------------|---------------------|-----------------|--------------------|--------------------|----------------------------------------------------------------------------------------------------------------------------------------------------------------------------------------------------------------------------------------------------------|
| TD55 c6        | chr1        | 187912763       | 188273214       | 32         | 360452         | Heterozygous        | Deletion        | rs1572508          | rs2067988          | -                                                                                                                                                                                                                                                        |
| <b>WS17 c1</b> | <b>chr7</b> | <b>72718035</b> | <b>74211785</b> | <b>118</b> | <b>1493751</b> | <b>Heterozygous</b> | <b>Deletion</b> | <b>indel.95994</b> | <b>indel.96097</b> | <b>ABHD11, ABHD11-AS1, BAZ1B, BCL7B, CLDN3, CLDN4, CLIP2, DNAJ C30, EIF4H, ELN, FKBP6, FZD9, GTF2, GTF2IRD1, GTF2IRD2, LAT2, LIMK1, LOC101926943, MIR4284, MIR590, MLXIPL, NCF1, NSUN5, RFC2, STX1A, TBL2, TRIM50, VPS37D, WBSCR22, WBSCR27, WBSCR28</b> |
| WS17 c1        | chr21       | 46930163        | 46952094        | 25         | 21932          | Heterozygous        | Deletion        | kgp10864217        | rs914231           | COL18A1, SLC19A1                                                                                                                                                                                                                                         |
| WS17 c1        | chr8        | 145618309       | 145818782       | 16         | 200474         | Heterozygous        | Deletion        | rs1052951          | rs11988651         | ADCK5, ARHGAP39, C8orf82, CPSF1, CYHR1, FOX H1, GPT, KIFC2, LOC100287098, LRRRC14, LRRRC24, MFSD3, MIR6849, MIR6893, MIR939, PPP1R16A, RE CQL4, SLC39A4, TONSL, VPS28                                                                                    |
| WS17 c1        | chr19       | 31801130        | 31888399        | 10         | 87270          | Heterozygous        | Deletion        | rs1078373          | rs2645162          | TSHZ3                                                                                                                                                                                                                                                    |
| WS17 c1        | chr5        | 58629497        | 58862944        | 30         | 233448         | Heterozygous        | Deletion        | rs16889615         | rs1395336          | PDE4D                                                                                                                                                                                                                                                    |
| WS17 c1        | chr2        | 132470837       | 132678071       | 10         | 207235         | Heterozygous        | Duplication     | rs1836809          | kgp205168          | C2orf27A, C2orf27B                                                                                                                                                                                                                                       |
| WS17 c1        | chr11       | 17408025        | 17429922        | 17         | 21898          | Heterozygous        | Deletion        | rs2285676          | rs2106865          | ABCC8, KCNJ11                                                                                                                                                                                                                                            |
| WS17 c1        | chr16       | 575312          | 711905          | 10         | 136594         | Heterozygous        | Deletion        | rs3760049          | rs2301426          | C16orf13, CAPN15, FAM195A, LINC00235, MIR3176, MIR5587, NHLRC4, PIGQ, PRR35, RAB40C, WDR90, WFIKKN1                                                                                                                                                      |
| WS17 c1        | chr10       | 134884595       | 134916045       | 10         | 31451          | Heterozygous        | Deletion        | rs4271313          | rs7918741          | GPR123, GPR123-AS1                                                                                                                                                                                                                                       |
| WS17 c1        | chr10       | 47109571        | 47687801        | 18         | 578231         | Homozygous          | Duplication     | rs7070073          | rs7076022          | AGAP9, ANTXRL, ANTXRLP1, ANXA8, BMS1P6, FAM25C, FAM25G, FAM35DP, HNRNPA1P33, LINC00842                                                                                                                                                                   |
| WS17 c1        | chr9        | 137220543       | 137330242       | 31         | 109700         | Heterozygous        | Deletion        | rs7855881          | kgp27254482        | MIR4669, RXRA                                                                                                                                                                                                                                            |
| WS17 c1        | chr10       | 68027026        | 68140020        | 22         | 112995         | Heterozygous        | Deletion        | rs7906924          | rs2007116          | CTNNA3                                                                                                                                                                                                                                                   |
| WS17 c1        | chr11       | 48516606        | 49095165        | 21         | 578560         | Heterozygous        | Duplication     | rs7944287          | rs12289759         | TRIM49B, TRIM64C                                                                                                                                                                                                                                         |
| WS17 c1        | chr21       | 46740019        | 46806423        | 13         | 66405          | Heterozygous        | Deletion        | rs9977697          | rs4819085          | LINC00316                                                                                                                                                                                                                                                |
| <b>WS17 c5</b> | <b>chr7</b> | <b>72718035</b> | <b>73239618</b> | <b>45</b>  | <b>521584</b>  | <b>Heterozygous</b> | <b>Deletion</b> | <b>indel.95994</b> | <b>rs4255023</b>   | <b>ABHD11, ABHD11-AS1, BAZ1B, BCL7B, CLDN3, DNAJC30, FKBP6, FZD9, MIR4284, MLXIPL, NSUN5, STX1A, TBL2, TRIM50, VPS37D, WBSCR22</b>                                                                                                                       |
| WS17 c5        | chr21       | 46840233        | 46975848        | 78         | 135616         | Heterozygous        | Deletion        | kgp23271266        | rs3827266          | COL18A1, COL18A1-AS1, MIR6815, SLC19A1                                                                                                                                                                                                                   |
| WS17 c5        | chr21       | 46840233        | 46975848        | 78         | 135616         | Heterozygous        | Deletion        | kgp23271266        | rs3827266          | COL18A1, COL18A1-AS1, MIR6815, SLC19A1                                                                                                                                                                                                                   |
| WS17 c5        | chr16       | 16138313        | 16162039        | 10         | 23727          | Heterozygous        | Deletion        | kgp4584538         | rs8187858          | ABCC1                                                                                                                                                                                                                                                    |
| WS17 c5        | chr17       | 19622643        | 19663747        | 25         | 41105          | Heterozygous        | Deletion        | rs11656096         | rs8067794          | ALDH3A1                                                                                                                                                                                                                                                  |
| WS17 c5        | chr7        | 73284148        | 73489736        | 12         | 205589         | Heterozygous        | Deletion        | rs11763011         | rs1091813          | ELN                                                                                                                                                                                                                                                      |
| WS17 c5        | chr9        | 137246262       | 137330242       | 27         | 83981          | Heterozygous        | Deletion        | rs12348547         | kgp27254482        | MIR4669, RXRA                                                                                                                                                                                                                                            |
| <b>WS17 c5</b> | <b>chr7</b> | <b>73568425</b> | <b>74211785</b> | <b>56</b>  | <b>643361</b>  | <b>Heterozygous</b> | <b>Deletion</b> | <b>rs12539781</b>  | <b>indel.96097</b> | <b>CLIP2, EIF4H, GTF2, GTF2IRD1, GTF2IRD2, LAT2, LOC101926943, MIR590, NCF1, RFC2</b>                                                                                                                                                                    |
| WS17 c5        | chr7        | 56104388        | 56206361        | 13         | 101974         | Heterozygous        | Duplication     | rs4275190          | rs816404           | CCT6A, CHCHD2, NUPR1L, PHKG1, PSPH, SNORA15, SUMF2                                                                                                                                                                                                       |
| WS17 c5        | chr7        | 57621951        | 57934758        | 12         | 312808         | Heterozygous        | Duplication     | rs4556041          | kgp10491           | -                                                                                                                                                                                                                                                        |
| WS17 c5        | chr14       | 103108842       | 103392249       | 15         | 283408         | Heterozygous        | Duplication     | rs942022           | rs1190229          | AMN, RCOR1, TRAF3                                                                                                                                                                                                                                        |
| WS17 c5        | chr13       | 41368601        | 41494967        | 17         | 126367         | Heterozygous        | Duplication     | rs9532591          | rs12857052         | MIR621, SLC25A15, SUGT1P3, TPTE2P5                                                                                                                                                                                                                       |
| WS25 c1        | <b>chr7</b> | <b>72718035</b> | <b>74211785</b> | <b>118</b> | <b>1493751</b> | <b>Heterozygous</b> | <b>Deletion</b> | <b>indel.95994</b> | <b>indel.96097</b> | <b>ABHD11, ABHD11-AS1, BAZ1B, BCL7B, CLDN3, CLDN4, CLIP2, DNAJ C30, EIF4H, ELN, FKBP6, FZD9, GTF2, GTF2IRD1, GTF2IRD2, LAT2, LIMK1, LOC101926943, MIR4284, M</b>                                                                                         |

|                  |             |                 |                 |            |                |                     |                 |                    |                       |                                                                                                                                                                                                                              |
|------------------|-------------|-----------------|-----------------|------------|----------------|---------------------|-----------------|--------------------|-----------------------|------------------------------------------------------------------------------------------------------------------------------------------------------------------------------------------------------------------------------|
| WS25 c1          | chr16       | 16138313        | 16162039        | 10         | 23727          | Heterozygous        | Deletion        | kgp4584538         | rs8187858             | IR590,MLXIPL,NCF1,NSUN5,RFC2,STX1A,TBL2,TRIM50,VPS37D,WBSCR22,WBSCR27,WBSCR28<br>ABCC1                                                                                                                                       |
| WS25 c1          | chr10       | 107587387       | 107682005       | 10         | 94619          | Heterozygous        | Deletion        | rs12249285         | rs1496078             | -                                                                                                                                                                                                                            |
| WS25 c1          | chr8        | 63358921        | 63428793        | 11         | 69873          | Heterozygous        | Deletion        | rs13266120         | rs1451859             | NKAIN3,NM_001304533,NR_130764                                                                                                                                                                                                |
| WS25 c1          | chr22       | 48917030        | 49033984        | 22         | 116955         | Heterozygous        | Deletion        | rs16999308         | rs7290651             | FAM19A5,LOC284933                                                                                                                                                                                                            |
| WS25 c1          | chr7        | 109774271       | 110192161       | 47         | 417891         | Heterozygous        | Duplication     | rs1722047          | rs4727740             | -                                                                                                                                                                                                                            |
| WS25 c1          | chr16       | 27322095        | 27378249        | 10         | 56155          | Heterozygous        | Deletion        | rs2057768          | rs4787956             | IL4R                                                                                                                                                                                                                         |
| WS25 c1          | chr9        | 137302631       | 137330242       | 16         | 27612          | Heterozygous        | Deletion        | rs3132296          | kgp27254482           | RXRA                                                                                                                                                                                                                         |
| WS25 c1          | chr4        | 43394110        | 43666139        | 22         | 272030         | Heterozygous        | Duplication     | rs671254           | rs13137462            | -                                                                                                                                                                                                                            |
| WS25 c1          | chr16       | 89115822        | 89261482        | 16         | 145661         | Heterozygous        | Deletion        | rs7198060          | rs2270416             | ACSF3,CDH15,LINC00304,LOC400558                                                                                                                                                                                              |
| WS25 c1          | chr17       | 44187257        | 44293020        | 10         | 105764         | Heterozygous        | Duplication     | rs9303525          | rs2668692             | KANSL1,KANSL1-AS1                                                                                                                                                                                                            |
| <b>WS25 c3</b>   | <b>chr7</b> | <b>72718035</b> | <b>74211785</b> | <b>118</b> | <b>1493751</b> | <b>Heterozygous</b> | <b>Deletion</b> | <b>indel.95994</b> | <b>indel.96097</b>    | <b>ABHD11, ABHD11-AS1,BAZ1B,BCL7B,CLDN3,CLDN4,CLIP2,DNAJ C30,EIF4H,ELN,FKBP6,FZD9,GTF2I,GTF2IRD1,GTF2IRD2,LAT2,LIMK1,LOC101926943,MIR4284,MIR590,MLXIPL,NCF1,NSUN5,RFC2,STX1A,TBL2,TRIM50,VPS37D,WBSCR22,WBSCR27,WBSCR28</b> |
| WS25 c3          | chr13       | 41383712        | 41494967        | 10         | 111256         | Heterozygous        | Duplication     | news121908535      | rs12857052            | MIR621,SLC25A15,SUGT1P3,TPT2P5                                                                                                                                                                                               |
| WS25 c3          | chr14       | 32204263        | 32353250        | 14         | 148988         | Heterozygous        | Deletion        | rs11846852         | rs2039485             | NUBPL                                                                                                                                                                                                                        |
| WS25 c3          | chr10       | 107572386       | 107682005       | 11         | 109620         | Heterozygous        | Deletion        | rs12250871         | rs1496078             | LOC101927549                                                                                                                                                                                                                 |
| WS25 c3          | chr21       | 46936423        | 47049185        | 14         | 112763         | Heterozygous        | Deletion        | rs1888530          | rs8128681             | SLC19A1                                                                                                                                                                                                                      |
| WS25 c3          | chr16       | 27322095        | 27378249        | 10         | 56155          | Heterozygous        | Deletion        | rs2057768          | rs4787956             | IL4R                                                                                                                                                                                                                         |
| WS25 c3          | chr8        | 63278209        | 63428793        | 15         | 150585         | Heterozygous        | Deletion        | rs2351667          | rs1451859             | NKAIN3,NM_001304533,NR_130764                                                                                                                                                                                                |
| WS25 c3          | chr4        | 43394110        | 43666139        | 22         | 272030         | Heterozygous        | Duplication     | rs671254           | rs13137462            | -                                                                                                                                                                                                                            |
| WS25 c3          | chr5        | 37472247        | 37591118        | 10         | 118872         | Heterozygous        | Deletion        | rs6869205          | rs10063001            | WDR70                                                                                                                                                                                                                        |
| WS25 c3          | chr16       | 89167094        | 89261482        | 13         | 94389          | Heterozygous        | Deletion        | rs7188200          | rs2270416             | ACSF3,CDH15,LINC00304,LOC400558                                                                                                                                                                                              |
| WS25 c3          | chr17       | 44187257        | 44293020        | 10         | 105764         | Heterozygous        | Duplication     | rs9303525          | rs2668692             | KANSL1,KANSL1-AS1                                                                                                                                                                                                            |
| <b>WS77 c5</b>   | <b>chr7</b> | <b>72718035</b> | <b>74211785</b> | <b>118</b> | <b>1493751</b> | <b>Heterozygous</b> | <b>Deletion</b> | <b>indel.95994</b> | <b>indel.96097</b>    | <b>ABHD11, ABHD11-AS1,BAZ1B,BCL7B,CLDN3,CLDN4,CLIP2,DNAJ C30,EIF4H,ELN,FKBP6,FZD9,GTF2I,GTF2IRD1,GTF2IRD2,LAT2,LIMK1,LOC101926943,MIR4284,MIR590,MLXIPL,NCF1,NSUN5,RFC2,STX1A,TBL2,TRIM50,VPS37D,WBSCR22,WBSCR27,WBSCR28</b> |
| WS77 c5          | chr12       | 37990350        | 38361657        | 14         | 371308         | Heterozygous        | Deletion        | kgp11472027        | rs1607882             | -                                                                                                                                                                                                                            |
| WS77 c5          | chr13       | 41383712        | 41494967        | 10         | 111256         | Heterozygous        | Duplication     | news121908535      | rs12857052            | MIR621,SLC25A15,SUGT1P3,TPT2P5                                                                                                                                                                                               |
| WS77 c5          | chr11       | 50417549        | 50682188        | 14         | 264640         | Heterozygous        | Deletion        | rs490842           | kgp12942313           | -                                                                                                                                                                                                                            |
| WS77 c5          | chr14       | 103222398       | 103455008       | 17         | 232611         | Heterozygous        | Deletion        | rs747164           | rs10140685            | AMN,CDC42BPB,TRAF3                                                                                                                                                                                                           |
| WS77 c5          | chr12       | 34362752        | 34801271        | 19         | 438520         | Heterozygous        | Deletion        | rs7977995          | rs9705446             | -                                                                                                                                                                                                                            |
| pWS88 c15        | chr12       | 8003758         | 8130958         | 21         | 127201         | Heterozygous        | Duplication     | rs4883452          | rs7964540             | SLC2A14,SLC2A3                                                                                                                                                                                                               |
| <b>pWS88 c15</b> | <b>chr7</b> | <b>73150511</b> | <b>73653319</b> | <b>34</b>  | <b>502809</b>  | <b>Heterozygous</b> | <b>Deletion</b> | <b>rs1059779</b>   | <b>var_7_73653319</b> | <b>ABHD11,CLDN3,CLDN4,EIF4H,ELN,LAT2,LIMK1,MIR590,RFC2,WBSCR27,WBSCR28</b>                                                                                                                                                   |

|                 |             |                 |                 |           |               |                     |                 |                   |                       |                                                                                              |
|-----------------|-------------|-----------------|-----------------|-----------|---------------|---------------------|-----------------|-------------------|-----------------------|----------------------------------------------------------------------------------------------|
| pWS88 c15       | chr14       | 46781200        | 46920762        | 16        | 139563        | Heterozygous        | Deletion        | rs12147827        | rs1612831             | LINC00871                                                                                    |
| pWS88 c15       | chr7        | 1507011         | 1602673         | 13        | 95663         | Heterozygous        | Deletion        | rs6962610         | rs2033572             | INTS1,MAFK,TMEM184A                                                                          |
| pWS88 c15       | chr7        | 57621951        | 57934758        | 12        | 312808        | Heterozygous        | Duplication     | rs4556041         | kgp10491              | -                                                                                            |
| pWS88 c1        | chr12       | 8003758         | 8130958         | 21        | 127201        | Heterozygous        | Duplication     | rs4883452         | rs7964540             | SLC2A14,SLC2A3                                                                               |
| <b>pWS88 c1</b> | <b>chr7</b> | <b>73150511</b> | <b>73653319</b> | <b>34</b> | <b>502809</b> | <b>Heterozygous</b> | <b>Deletion</b> | <b>rs1059779</b>  | <b>var_7_73653319</b> | <b>ABHD11,CLDN3,CLDN4,EIF4H,ELN,LAT2,LIMK1,<br/>MIR590,RFC2,WBSCR27,WBSCR28</b><br>LINC00871 |
| pWS88 c1        | chr14       | 46781200        | 46920762        | 16        | 139563        | Heterozygous        | Deletion        | rs12147827        | rs1612831             | LINC00871                                                                                    |
| pWS88 c1        | chr7        | 1507011         | 1602673         | 13        | 95663         | Heterozygous        | Deletion        | rs6962610         | rs2033572             | INTS1,MAFK,TMEM184A                                                                          |
| pWS88 c2        | chr12       | 8003758         | 8130958         | 21        | 127201        | Heterozygous        | Duplication     | rs4883452         | rs7964540             | SLC2A14,SLC2A3                                                                               |
| pWS88 c2        | chr14       | 32204263        | 32343671        | 13        | 139409        | Heterozygous        | Deletion        | rs11846852        | rs2184307             | NUBPL                                                                                        |
| pWS88 c2        | chr14       | 46781200        | 46920762        | 16        | 139563        | Heterozygous        | Deletion        | rs12147827        | rs1612831             | LINC00871                                                                                    |
| pWS88 c2        | chr7        | 1507011         | 1604320         | 14        | 97310         | Heterozygous        | Deletion        | rs6962610         | rs12702933            | INTS1,MAFK,TMEM184A                                                                          |
| pWS88 c2        | chr7        | 57621951        | 57934758        | 12        | 312808        | Heterozygous        | Duplication     | rs4556041         | kgp10491              | -                                                                                            |
| <b>pWS88 c2</b> | <b>chr7</b> | <b>73182017</b> | <b>73653319</b> | <b>33</b> | <b>471303</b> | <b>Heterozygous</b> | <b>Deletion</b> | <b>rs12536661</b> | <b>var_7_73653319</b> | <b>CLDN3,CLDN4,EIF4H,ELN,LAT2,LIMK1,MIR590,<br/>RFC2,WBSCR27,WBSCR28</b>                     |

**Supplementary Table 3. Per sample expression of WS-related genes in iPSCs, NPCs and neurons (NE) in TD, WS and pWS88.**

| ENSEMBL<br>Accession ID | Gene name | iPSC             |                     |                  | NPC              |                     |                  | NE               |                     |                  |
|-------------------------|-----------|------------------|---------------------|------------------|------------------|---------------------|------------------|------------------|---------------------|------------------|
|                         |           | Expression<br>TD | Expression<br>pWS88 | Expression<br>WS | Expression<br>TD | Expression<br>pWS88 | Expression<br>WS | Expression<br>TD | Expression<br>pWS88 | Expression<br>WS |
| ENSG00000158517         | NCF1      | 1.291541755      | 4.28017161          | 1.384563585      | 0.10178143       | 0.313658293         | 0.160666978      | 2.475282923      | 2.170883243         | 7.901160783      |
| ENSG00000009950         | MLXIPL    | 272.6517748      | 454.5197027         | 143.8180197      | 6.638716725      | 2.983311822         | 6.105788756      | 150.9733365      | 108.4390019         | 66.13408404      |
| ENSG00000106089         | STX1A     | 160.7290634      | 221.728405          | 88.68956424      | 247.200747       | 278.371276          | 90.59887955      | 1627.443428      | 1671.7453           | 864.603219       |
| ENSG00000077800         | FKBP6     | 2.164766112      | 2.937905873         | 2.157084202      | 2.818707507      | 1.308095567         | 3.789990468      | 17.7779627       | 11.50793709         | 18.60697145      |
| ENSG00000176428         | VPS37D    | 189.7940625      | 354.7092978         | 66.42469206      | 282.8060798      | 526.5388469         | 118.3596269      | 1550.792715      | 1820.924787         | 1020.035156      |
| ENSG00000229018         | PMS2P7    | 54.60230338      | 67.30336356         | 52.3656643       | 50.09829845      | 60.62855952         | 41.83344897      | 271.9830678      | 232.240916          | 230.2972479      |
| ENSG00000146755         | TRIM50    | 1.853696515      | 9.630136034         | 1.164769165      | 1.013603182      | 0.627316587         | 1.227135758      | 5.374180583      | 6.491617668         | 4.39505318       |
| ENSG00000165215         | CLDN3     | 576.4932004      | 442.5418061         | 322.1131317      | 0.814249537      | 0.627316587         | 0.542963519      | 4.31526384       | 1.454266183         | 2.269057864      |
| ENSG00000196275         | GTF2IRD2  | 35.98404925      | 34.42135424         | 25.12229061      | 200.2630646      | 238.8255167         | 138.3904395      | 680.0846227      | 634.5858574         | 694.2252314      |
| ENSG00000174368         | PMS2P2    | 46.42503532      | 40.35246085         | 42.2161215       | 46.78018943      | 46.23239221         | 40.28223012      | 126.3635015      | 125.6362844         | 124.5228688      |
| ENSG00000123965         | PMS2P5    | 104.3237263      | 103.3032601         | 103.0938109      | 116.9841525      | 101.2008703         | 95.58019325      | 301.3085225      | 330.4369584         | 328.8024581      |
| ENSG00000106665         | CLIP2     | 5785.009222      | 4619.900899         | 3065.473982      | 5554.340604      | 5766.114961         | 2836.086922      | 11186.19603      | 11866.94115         | 6526.690272      |
| ENSG00000233369         | GTF2IP4   | 1819.545342      | 1864.594561         | 1081.599178      | 1893.663604      | 2099.86652          | 1262.231429      | 3513.225872      | 2470.249885         | 3154.660344      |
| ENSG00000174353         | STAG3L3   | 205.3121677      | 177.0595762         | 230.4226157      | 284.1393772      | 168.0312513         | 225.9450889      | 424.0458742      | 409.1355888         | 527.9817973      |
| ENSG00000086730         | LAT2      | 54.42574511      | 33.78691789         | 30.59613536      | 77.70265236      | 36.76206495         | 43.58599859      | 94.87711827      | 63.1028385          | 42.60374912      |
| ENSG00000049540         | ELN       | 562.8473587      | 376.0739595         | 248.1656541      | 163.8159153      | 132.7343866         | 82.40533624      | 183.9955415      | 122.0952632         | 62.8005506       |
| ENSG00000006704         | GTF2IRD1  | 2401.430609      | 3356.870304         | 1542.908503      | 2453.889488      | 2523.4238           | 1560.12189       | 2732.396365      | 2774.20255          | 1744.397638      |
| ENSG00000165171         | WBSCR27   | 173.0802339      | 199.4437376         | 209.9301962      | 31.09500056      | 20.56240839         | 40.17227043      | 22.98498103      | 29.90710104         | 14.43977475      |
| ENSG00000176410         | DNAJC30   | 184.8637584      | 229.3134477         | 96.03232284      | 162.298981       | 221.317397          | 88.02121469      | 116.1961333      | 158.178501          | 78.78005519      |
| ENSG00000106638         | TBL2      | 1212.977279      | 1644.289818         | 572.1228225      | 1715.973697      | 1668.339668         | 833.8821712      | 1178.698133      | 1381.851904         | 606.4164112      |
| ENSG00000130305         | NSUN5     | 2189.449876      | 2515.638102         | 1486.294058      | 1154.464188      | 1166.524184         | 692.4937306      | 723.0827052      | 791.5670577         | 383.7788576      |
| ENSG00000106077         | ABHD11    | 435.8875348      | 251.8192945         | 209.5679573      | 288.0290297      | 139.4741144         | 147.3770814      | 153.1729386      | 117.164599          | 102.9860823      |
| ENSG00000009954         | BAZ1B     | 9809.651218      | 8592.754962         | 4066.182821      | 14958.56537      | 13759.29385         | 7971.287562      | 7622.322759      | 7320.174853         | 3559.214892      |
| ENSG00000188763         | FZD9      | 180.6470581      | 267.6892064         | 94.59071882      | 301.5210402      | 301.0898784         | 171.8367807      | 145.1550327      | 273.4876976         | 84.05395531      |

|                 |         |             |             |             |             |             |             |             |             |             |
|-----------------|---------|-------------|-------------|-------------|-------------|-------------|-------------|-------------|-------------|-------------|
| ENSG00000189143 | CLDN4   | 1107.293588 | 610.22262   | 599.0244269 | 27.65030865 | 19.17585231 | 79.79640324 | 12.38334413 | 23.81661949 | 16.25712131 |
| ENSG00000106683 | LIMK1   | 7657.21693  | 5203.844249 | 4137.404023 | 5858.784903 | 3462.970689 | 3822.780647 | 2568.691985 | 1671.010705 | 1571.273401 |
| ENSG00000106682 | EIF4H   | 8702.135717 | 4015.882134 | 4915.308569 | 6841.541846 | 3532.226205 | 3997.808091 | 2895.768903 | 1579.438235 | 1437.642825 |
| ENSG00000071462 | WBSCR22 | 3015.76683  | 3345.7985   | 2051.493136 | 2502.432339 | 2469.84096  | 1298.684615 | 920.8589712 | 1213.346315 | 499.3650937 |
| ENSG00000106635 | BCL7B   | 1358.387859 | 1557.433611 | 877.1930429 | 1844.668945 | 2218.078279 | 989.3251936 | 560.8661307 | 807.0351303 | 338.7094951 |
| ENSG00000049541 | RFC2    | 4283.996389 | 2153.729825 | 2567.502984 | 2905.848211 | 1544.131351 | 1838.954971 | 721.787514  | 398.3442687 | 387.5855542 |
| ENSG00000263001 | GTF2I   | 0           | 0           | 0           | 0           | 0           | 0           | 0           | 0           | 0           |
| ENSG00000175877 | WBSCR28 | 1.390248739 | 0           | 0.672773964 | 0           | 0           | 0           | 4.67816763  | 0           | 0           |

**Supplementary Table 4. Expression profile of downstream genes at deleted genomic region of WS (typical).**

| Gene description |                      | IPSC       |            |             |                    |         | NPC        |            |             |                    |         | NE         |            |             |                    |         |
|------------------|----------------------|------------|------------|-------------|--------------------|---------|------------|------------|-------------|--------------------|---------|------------|------------|-------------|--------------------|---------|
| Ensembl Gene ID  | Associated Gene Name | Express TD | Express WS | Fold-change | Log2 (Fold-change) | P-value | Express TD | Express WS | Fold-change | Log2 (Fold-change) | P-value | Express TD | Express WS | Fold-change | Log2 (Fold-change) | P-value |
| ENSG00000005486  | RHBDD2               | 1643.26    | 1689.11    | 1.0279      | 0.0397             | 0.9152  | 4214.65    | 4099.53    | 0.9727      | -0.0400            | 1.0000  | 3554.50    | 4213.17    | 1.1853      | 0.2453             | 0.6060  |
| ENSG00000006606  | CCL26                | 95.0481    | 168.341    | 1.7711      | 0.8247             | 0.1898  | 0.0000     | 0.0000     | NA          | NA                 | NA      | 0.0000     | 0.0000     | NA          | NA                 | NA      |
| ENSG00000106178  | CCL24                | 0.0000     | 0.0000     | NA          | NA                 | NA      | 0.6107     | 0.0000     | 0.0000      | NA                 | 0.8538  | 0.0000     | 0.0000     | NA          | NA                 | NA      |
| ENSG00000127946  | HIP1                 | 14095.1    | 13822.8    | 0.9807      | -0.0282            | 0.8650  | 10650.7    | 14159.0    | 1.3294      | 0.4108             | 0.3755  | 5234.80    | 5028.63    | 0.9606      | -0.0580            | 0.8926  |
| ENSG00000127948  | POR                  | 5288.53    | 7069.56    | 1.3368      | 0.4188             | 0.4337  | 4096.97    | 4357.64    | 1.0636      | 0.0890             | 0.8239  | 3325.77    | 3913.80    | 1.1768      | 0.2349             | 0.6475  |
| ENSG00000127952  | STYXL1               | 1344.28    | 1516.95    | 1.1284      | 0.1743             | 0.8676  | 622.793    | 773.069    | 1.2413      | 0.3118             | 0.5465  | 429.555    | 453.508    | 1.0558      | 0.0783             | 0.8661  |
| ENSG00000127957  | PMS2P3               | 143.181    | 143.136    | 0.9997      | -0.0005            | 0.9504  | 206.816    | 172.488    | 0.8340      | -0.2618            | 0.5274  | 432.930    | 433.425    | 1.0011      | 0.0016             | 0.9990  |
| ENSG00000146701  | MDH2                 | 11642.3    | 15067.4    | 1.2942      | 0.3721             | 0.5426  | 6740.34    | 7571.87    | 1.1234      | 0.1678             | 0.7473  | 2892.23    | 3887.48    | 1.3441      | 0.4267             | 0.3476  |
| ENSG00000146722  | AC006014.8           | 4.7717     | 3.2423     | 0.6795      | -0.5575            | 0.6320  | 11.7952    | 8.6600     | 0.7342      | -0.4458            | 0.5089  | 37.7930    | 47.3211    | 1.2521      | 0.3244             | 0.6100  |
| ENSG00000170092  | SPDYE5               | 17.8463    | 24.8859    | 1.3945      | 0.4797             | 0.4838  | 72.2981    | 60.6330    | 0.8387      | -0.2539            | 0.6112  | 99.0228    | 119.715    | 1.2090      | 0.2738             | 0.6221  |
| ENSG00000177679  | SRRM3                | 1090.66    | 1603.67    | 1.4704      | 0.5562             | 0.3072  | 218.409    | 241.579    | 1.1061      | 0.1455             | 0.7425  | 2260.08    | 2741.32    | 1.2129      | 0.2785             | 0.5459  |
| ENSG00000178809  | TRIM73               | 7.0498     | 5.4804     | 0.7774      | -0.3633            | 0.8168  | 30.2264    | 22.7363    | 0.7522      | -0.4108            | 0.4237  | 162.746    | 166.100    | 1.0206      | 0.0294             | 0.9323  |
| ENSG00000189077  | TMEM120A             | 717.904    | 950.566    | 1.3241      | 0.4050             | 0.4571  | 966.064    | 1135.12    | 1.1750      | 0.2327             | 0.5667  | 628.292    | 738.672    | 1.1757      | 0.2335             | 0.6127  |
| ENSG00000199870  | Y_RNA                | 0.0000     | 0.0000     | NA          | NA                 | NA      | 0.0000     | 0.0000     | NA          | NA                 | NA      | 0.4969     | 2.0298     | 4.0849      | 2.0303             | 0.7816  |
| ENSG00000200874  | Y_RNA                | 0.0000     | 0.0000     | NA          | NA                 | NA      | 0.0000     | 0.0000     | NA          | NA                 | NA      | 1.2520     | 2.1736     | 1.7361      | 0.7958             | 0.8883  |
| ENSG00000201643  | SNORA14A             | 1.4115     | 0.9678     | 0.6856      | -0.5445            | 0.7655  | 0.5025     | 0.9419     | 1.8747      | 0.9066             | 0.8047  | 5.1089     | 6.6995     | 1.3113      | 0.3910             | 0.8396  |
| ENSG00000205583  | STAG3L1              | 242.096    | 295.407    | 1.2202      | 0.2871             | 0.5188  | 321.948    | 298.475    | 0.9271      | -0.1092            | 0.6797  | 582.106    | 622.290    | 1.0690      | 0.0963             | 0.8603  |
| ENSG00000213549  | AC005077.8           | 2.6547     | 2.6018     | 0.9801      | -0.0290            | 0.9990  | 0.1287     | 0.0000     | 0.0000      | NA                 | 1.0000  | 1.9876     | 3.0777     | 1.5484      | 0.6308             | 0.8683  |
| ENSG00000219039  | AC005102.1           | 9.8319     | 8.2404     | 0.8381      | -0.2548            | 0.7998  | 4.8733     | 8.9745     | 1.8415      | 0.8809             | 0.5315  | 0.0000     | 0.0000     | NA          | NA                 | NA      |
| ENSG00000223705  | NSUN5P1              | 1143.65    | 1175.51    | 1.0279      | 0.0396             | 0.8463  | 973.001    | 720.035    | 0.7400      | -0.4344            | 0.2635  | 615.933    | 542.491    | 0.8808      | -0.1832            | 0.6875  |
| ENSG00000224273  | AC005077.7           | 58.0177    | 68.8604    | 1.1869      | 0.2472             | 0.6314  | 41.9880    | 57.3660    | 1.3662      | 0.4502             | 0.4000  | 4.2529     | 3.9549     | 0.9299      | -0.1048            | 11.0000 |
| ENSG00000227038  | GTF2IP7              | 24.7582    | 30.5565    | 1.2342      | 0.3036             | 0.7353  | 2.1811     | 2.0570     | 0.9431      | -0.0845            | 0.9200  | 7.5483     | 19.0476    | 2.5234      | 1.3354             | 0.1200  |
| ENSG00000228829  | AC005077.5           | 0.5023     | 0.3455     | 0.6878      | -0.5399            | NA      | 0.3220     | 0.1486     | 0.4615      | -1.1156            | 1.0000  | 3.8911     | 5.0013     | 1.2853      | 0.3621             | 11.0000 |

|                 |             |         |         |        |         |        |        |        |        |         |        |         |         |        |         |        |
|-----------------|-------------|---------|---------|--------|---------|--------|--------|--------|--------|---------|--------|---------|---------|--------|---------|--------|
| ENSG00000230882 | AC005077.14 | 112.615 | 78.3775 | 0.6960 | -0.5229 | 0.2715 | 1.7842 | 1.8578 | 1.0412 | 0.0583  | 0.8156 | 1.4907  | 0.4756  | 0.3191 | -1.6481 | 0.7129 |
| ENSG00000235090 | RPL7L1P3    | 0.0000  | 0.1728  | Inf    | Inf     | 0.9462 | 0.2036 | 0.1557 | 0.7647 | -0.3871 | -      | 48.5094 | 44.3403 | 0.9141 | -0.1296 | 0.8433 |
| ENSG00000241778 | AC005077.9  | 0.0000  | 0.0000  | NA     | NA      | NA     | 0.0000 | 0.0000 | NA     | NA      | NA     | 0.0000  | 0.0000  | NA     | NA      | NA     |
| ENSG00000242073 | AC006014.7  | 0.0000  | 0.0000  | NA     | NA      | NA     | 0.0000 | 0.0000 | NA     | NA      | NA     | 0.0000  | 0.0000  | NA     | NA      | NA     |
| ENSG00000251798 | RNU6-863P   | 0.2074  | 0.1545  | 0.7448 | -0.4251 | -      | 0.0000 | 0.1911 | Inf    | Inf     | 1.0000 | 0.4969  | 1.0693  | 2.1519 | 1.1056  | 0.9881 |

**Supplementary Table 5. Expression profile of upstream genes at deleted genomic region of WS (typical).**

| Gene description |                      | IPSC       |            |             |                    |         | NPC        |            |             |                    |         | NE         |            |             |                    |         |
|------------------|----------------------|------------|------------|-------------|--------------------|---------|------------|------------|-------------|--------------------|---------|------------|------------|-------------|--------------------|---------|
| Ensembl Gene ID  | Associated Gene Name | Express TD | Express WS | Fold-change | Log2 (Fold-change) | P-value | Express TD | Express WS | Fold-change | Log2 (Fold-change) | P-value | Express TD | Express WS | Fold-change | Log2 (Fold-change) | P-value |
| ENSG00000225648  | SBDSP1               | 688.060    | 606.038    | 0.8808      | -0.1831            | 0.6906  | 1191.03    | 1375.45    | 1.1548      | 0.2077             | 0.7368  | 1363.58    | 1233.93    | 0.9049      | -0.1441            | 0.7497  |
| ENSG00000183166  | CALN1                | 1306.93    | 1132.72    | 0.8667      | -0.2064            | 0.7305  | 21.1985    | 30.3939    | 1.4338      | 0.5198             | 0.2135  | 1747.11    | 2045.51    | 1.1708      | 0.2275             | 0.6313  |
| ENSG00000266569  | RN7SL377P            | 0.0000     | 0.0000     | NA          | NA                 | NA      | 0.0000     | 0.0000     | NA          | NA                 | NA      | 1.3676     | 2.7325     | 1.9981      | 0.9986             | 0.8473  |
| ENSG00000228769  | ABCF2P2              | 0.0000     | 0.0000     | NA          | NA                 | NA      | 0.0000     | 0.0000     | NA          | NA                 | NA      | 0.8419     | 4.5145     | 5.3623      | 2.4228             | 0.5450  |
| ENSG00000179994  | SPDYE7P              | 10.3540    | 13.3021    | 1.2847      | 0.3615             | 0.7921  | 26.1142    | 19.9423    | 0.7637      | -0.3890            | 0.5413  | 36.2426    | 24.1711    | 0.6669      | -0.5844            | 0.4657  |
| ENSG00000266772  | AC211469.1           | 0.0000     | 0.0000     | NA          | NA                 | NA      | 0.0000     | 0.0000     | NA          | NA                 | NA      | 1.4180     | 2.1850     | 1.5409      | 0.6238             | 0.9167  |
| ENSG00000155428  | TRIM74               | 5.5448     | 2.2218     | 0.4007      | -1.3194            | 0.1341  | 21.0952    | 12.7058    | 0.6023      | -0.7314            | 0.2874  | 87.4799    | 108.185    | 1.2367      | 0.3065             | 0.6402  |
| ENSG00000196313  | POM121               | 4080.96    | 5051.63    | 1.2379      | 0.3078             | 0.6189  | 5669.32    | 5309.26    | 0.9365      | -0.0947            | 0.8298  | 1642.62    | 2104.65    | 1.2813      | 0.3576             | 0.4051  |
| ENSG00000106133  | NSUN5P2              | 81.5119    | 111.023    | 1.3621      | 0.4458             | 0.3177  | 86.4611    | 61.4677    | 0.7109      | -0.4922            | 0.2530  | 98.8522    | 106.080    | 1.0731      | 0.1018             | 0.8243  |



**Supplementary Table 6. Expression analysis of OCT4-related pseudogenes in iPSCs, NPCs and neurons (NE) of TD and WS samples.**

| Pseudogene Description |                 |          | iPSC       |            |             |                    |         | NPC        |            |             |                    |         | NE         |            |             |                    |         |
|------------------------|-----------------|----------|------------|------------|-------------|--------------------|---------|------------|------------|-------------|--------------------|---------|------------|------------|-------------|--------------------|---------|
| Pseudo gene            | ENSEMBL gene ID | Chr band | Express TD | Express WS | Fold-change | Log2 (Fold-change) | P-value | Express TD | Express WS | Fold-change | Log2 (Fold-change) | P-value | Express TD | Express WS | Fold-change | Log2 (Fold-change) | P-value |
| POU5F1P1               | 00000212993     | 8q24.21  | 18622.7    | 23277.65   | 1.2500      | 0.3219             | 0.635   | 1070.11    | 71.8047    | 0.0671      | -3.8975            | 1.8E-16 | 135.578    | 113.260    | 0.8354      | -0.2595            | 0.4585  |
| POU5F1P2               | 00000253382     | 8q22.2   | 0.0000     | 0.0000     | NA          | NA                 | NA      | 0.0000     | 0.0000     | NA          | NA                 | NA      | 0.0000     | 0.0000     | NA          | NA                 | NA      |
| POU5F1P3               | 00000235602     | 12p13.31 | 23049.8    | 27352.05   | 1.1866      | 0.2469             | 0.757   | 1191.27    | 84.6285    | 0.0710      | -3.8152            | 4.3E-16 | 140.093    | 39.4680    | 0.2817      | -1.8276            | 1.3E-04 |
| POU5F1P4               | 00000237872     | 1q22     | 21157.5    | 25177.83   | 1.1900      | 0.2510             | 0.750   | 1180.68    | 84.3851    | 0.0715      | -3.8065            | 4.4E-16 | 135.930    | 51.2107    | 0.3767      | -1.4084            | 1.8E-03 |
| POU5F1P5               | 00000236375     | 10q21.3  | 5.6599     | 3.6691     | 0.6483      | -0.6253            | 0.657   | 0.2203     | 0.0000     | 0.0000      | NA                 | 1.0000  | 36.5873    | 30.6088    | 0.8366      | -0.2574            | 0.8230  |
| POU5F1P6               | 00000242551     | 3q21.3   | 0.5708     | 1.3865     | 2.4291      | 1.2804             | 0.676   | 3.4374     | 1.5496     | 0.4508      | -1.1495            | 4.6E-01 | 70.3261    | 50.7826    | 0.7221      | -0.4697            | 0.7409  |
| POU5F1P7               | 00000248365     | 3q11.2   | 0.0000     | 0.0000     | NA          | NA                 | NA      | 0.0000     | 0.0000     | NA          | NA                 | NA      | 0.0000     | 0.0000     | NA          | NA                 | NA      |

**Supplementary Table 7. FZD9 normalized expression with statistical significance in iPSCs, NPCs and NE cells of TD and WS samples.**

| Cell type | TD          | WS          | log2 (Fold-Change) | p-value     |
|-----------|-------------|-------------|--------------------|-------------|
| IPSC      | 180.6470581 | 94.59071882 | -0.933403221       | 0.065858777 |
| NPC       | 301.5210402 | 171.8367807 | -0.811219807       | 0.074936343 |
| NE        | 145.1550327 | 84.05395531 | -0.788206978       | 0.103120197 |

**Supplementary Table 8. Differentially expressed genes in WS compared to TD in NPCs.**

| ENSEMBL ID      | Expression TD | Expression WS | Fold-change | Log2(Fold-change) | p-value  |
|-----------------|---------------|---------------|-------------|-------------------|----------|
| ENSG00000212993 | 1070.111029   | 71.80473343   | 0.067100265 | -3.89753773       | 1.84E-16 |
| ENSG00000204531 | 1323.528711   | 90.42209467   | 0.068318952 | -3.871570342      | 2.00E-16 |
| ENSG00000235602 | 1191.272874   | 84.62846518   | 0.07104037  | -3.815217103      | 4.31E-16 |
| ENSG00000237872 | 1180.687451   | 84.3850718    | 0.071471135 | -3.806495497      | 4.48E-16 |
| ENSG00000173698 | 122.6894464   | 8.733242334   | 0.071181692 | -3.812349972      | 1.09E-14 |
| ENSG00000106018 | 41.59837519   | 0.964001871   | 0.023174027 | -5.431347422      | 2.36E-13 |
| ENSG0000013293  | 85.36489993   | 5.386276885   | 0.063097091 | -3.986282689      | 4.57E-13 |
| ENSG00000118160 | 548.1647229   | 32.55416913   | 0.059387567 | -4.073695264      | 1.96E-12 |
| ENSG00000173068 | 640.0959607   | 80.36155645   | 0.125546108 | -2.993710793      | 1.75E-10 |
| ENSG00000162670 | 42.01907483   | 1.578013325   | 0.03755469  | -4.734863105      | 2.27E-10 |
| ENSG00000155886 | 27.01999639   | 2.038607859   | 0.075448117 | -3.728371288      | 2.37E-10 |
| ENSG00000007314 | 19.58528038   | 1.642600937   | 0.083869156 | -3.575715851      | 4.45E-10 |
| ENSG00000166825 | 61.61493016   | 2.547306118   | 0.041342352 | -4.59623573       | 1.42E-09 |
| ENSG00000115194 | 3.061910651   | 31.46776784   | 10.27716724 | 3.361370755       | 3.80E-09 |
| ENSG00000107562 | 135.6770605   | 18.05696687   | 0.13308784  | -2.909549338      | 4.33E-09 |
| ENSG00000017483 | 66.37450737   | 7.800500499   | 0.117522537 | -3.08899065       | 7.54E-09 |
| ENSG00000261425 | 31.96280968   | 1.363708988   | 0.042665492 | -4.550786519      | 3.06E-08 |
| ENSG00000135312 | 37.72171364   | 3.440418992   | 0.091205268 | -3.454739037      | 3.06E-08 |
| ENSG00000071909 | 15.08639433   | 0.304280796   | 0.020169219 | -5.631700944      | 3.18E-08 |
| ENSG00000105143 | 21.34862206   | 171.5307555   | 8.034745989 | 3.006252415       | 4.97E-08 |
| ENSG00000141013 | 158.2049126   | 26.84874896   | 0.169708693 | -2.558867628      | 6.40E-08 |
| ENSG00000185046 | 764.470329    | 132.6041855   | 0.173458904 | -2.527334194      | 7.47E-08 |
| ENSG00000101311 | 46.64311676   | 8.290477318   | 0.177742782 | -2.492137123      | 7.47E-08 |
| ENSG00000161381 | 119.0532977   | 13.91385958   | 0.116870846 | -3.097013013      | 9.15E-08 |
| ENSG00000084636 | 372.3144414   | 4.582941993   | 0.012309332 | -6.344103741      | 9.24E-08 |
| ENSG00000172995 | 34.08147975   | 3.540123387   | 0.10387235  | -3.267116426      | 9.56E-08 |
| ENSG00000020181 | 1420.486116   | 46.57041225   | 0.032784842 | -4.930827267      | 1.16E-07 |
| ENSG00000264443 | 17.15111291   | 1.567557178   | 0.09139682  | -3.451712222      | 1.46E-07 |
| ENSG00000103316 | 20.33298705   | 2.7700323     | 0.136233417 | -2.875847468      | 1.74E-07 |
| ENSG00000111077 | 667.0608534   | 116.1920186   | 0.174185036 | -2.521307408      | 2.11E-07 |
| ENSG00000205035 | 30.23273102   | 2.681719347   | 0.088702517 | -3.494881142      | 2.24E-07 |
| ENSG00000117602 | 62.58834074   | 10.04238727   | 0.160451406 | -2.639791663      | 2.61E-07 |
| ENSG00000117600 | 259.0426888   | 9.786011724   | 0.037777602 | -4.726325044      | 2.75E-07 |
| ENSG00000219438 | 0.660798155   | 60.04956266   | 90.87428927 | 6.505800271       | 2.80E-07 |
| ENSG00000169891 | 131.0405163   | 13.86132122   | 0.105778897 | -3.240876264      | 3.06E-07 |
| ENSG00000087116 | 94.78990873   | 15.08850274   | 0.159178366 | -2.651283827      | 3.93E-07 |
| ENSG00000188674 | 123.6427002   | 26.12016868   | 0.211255243 | -2.242940948      | 4.04E-07 |
| ENSG00000145864 | 50.55675888   | 6.857618006   | 0.135641963 | -2.882124529      | 4.58E-07 |
| ENSG00000204018 | 82.35460652   | 11.98081154   | 0.145478341 | -2.781123715      | 4.66E-07 |

|                 |             |             |             |              |          |
|-----------------|-------------|-------------|-------------|--------------|----------|
| ENSG00000198692 | 630.0153281 | 1.459430937 | 0.002316501 | -8.753837177 | 6.22E-07 |
| ENSG00000129354 | 21.26857078 | 123.7947524 | 5.820548718 | 2.541155166  | 6.30E-07 |
| ENSG00000152580 | 127.4902132 | 3.720519881 | 0.029182788 | -5.098738464 | 6.71E-07 |
| ENSG00000187479 | 37.38395018 | 5.45187496  | 0.145834641 | -2.777594641 | 8.28E-07 |
| ENSG00000135744 | 24.7824169  | 0.651089759 | 0.026272246 | -5.250316636 | 8.72E-07 |
| ENSG00000101460 | 108.2035588 | 5.712036863 | 0.052789732 | -4.24359885  | 9.46E-07 |
| ENSG00000153246 | 105.6843883 | 16.27614888 | 0.154007126 | -2.698930991 | 9.70E-07 |
| ENSG00000164176 | 1010.54488  | 213.1385033 | 0.210914436 | -2.245270253 | 1.25E-06 |
| ENSG00000089327 | 73.42700608 | 16.07055333 | 0.218864341 | -2.191891173 | 1.26E-06 |
| ENSG00000146038 | 57.495856   | 6.308688272 | 0.109724226 | -3.188046007 | 1.44E-06 |
| ENSG00000077274 | 29.41862941 | 6.361094706 | 0.216226753 | -2.209383063 | 1.56E-06 |
| ENSG00000151468 | 441.3206632 | 91.73668165 | 0.207868539 | -2.26625667  | 1.62E-06 |
| ENSG00000151067 | 440.7991219 | 100.1332291 | 0.22716295  | -2.13820054  | 1.89E-06 |
| ENSG00000087510 | 72.55535701 | 14.71307056 | 0.20278407  | -2.301983775 | 2.46E-06 |
| ENSG00000185742 | 103.392935  | 19.71296978 | 0.190660704 | -2.390920567 | 2.63E-06 |
| ENSG00000234261 | 4.495086114 | 0.19114827  | 0.042523828 | -4.555584706 | 2.85E-06 |
| ENSG00000260244 | 26.04804552 | 2.021554698 | 0.07760869  | -3.687637981 | 3.28E-06 |
| ENSG00000135547 | 69.6363272  | 15.29117311 | 0.219586152 | -2.187141022 | 3.29E-06 |
| ENSG00000151834 | 54.50613575 | 14.35855135 | 0.26343     | -1.924508442 | 3.45E-06 |
| ENSG00000163814 | 35.3310373  | 7.946441861 | 0.224913913 | -2.152555185 | 4.03E-06 |
| ENSG00000159167 | 306.0785597 | 65.81915294 | 0.215040064 | -2.217322625 | 4.25E-06 |
| ENSG00000134533 | 79.7697288  | 9.510005601 | 0.119218227 | -3.068323277 | 4.35E-06 |
| ENSG00000239389 | 16.34048538 | 2.642163165 | 0.161694289 | -2.62865937  | 4.45E-06 |
| ENSG00000145681 | 16.46096095 | 1.238529587 | 0.075240418 | -3.732348321 | 4.74E-06 |
| ENSG00000171992 | 729.8309356 | 46.918962   | 0.064287439 | -3.959319302 | 4.80E-06 |
| ENSG00000172403 | 142.5945728 | 9.826556121 | 0.068912553 | -3.859089375 | 4.80E-06 |
| ENSG00000145242 | 170.165165  | 9.167463721 | 0.053873916 | -4.214269267 | 6.34E-06 |
| ENSG00000102007 | 29.53424861 | 5.05066566  | 0.171010467 | -2.547843461 | 7.69E-06 |
| ENSG00000124749 | 165.604314  | 1.640566635 | 0.009906545 | -6.657402252 | 7.72E-06 |
| ENSG00000042832 | 20.94487034 | 1.779544962 | 0.084963284 | -3.557016664 | 8.01E-06 |
| ENSG00000107317 | 61.65847089 | 3.971617886 | 0.064413175 | -3.95650038  | 8.14E-06 |
| ENSG00000170190 | 84.16883117 | 18.52632532 | 0.220109096 | -2.183709331 | 9.05E-06 |
| ENSG00000126803 | 1731.004563 | 77.64920188 | 0.044857884 | -4.478494622 | 9.67E-06 |
| ENSG00000169851 | 1625.967822 | 431.2802046 | 0.265245227 | -1.914601303 | 1.02E-05 |
| ENSG00000263571 | 5.215338986 | 0           | 0           | -Inf         | 1.06E-05 |
| ENSG00000222019 | 8.662349443 | 0.644049171 | 0.074350403 | -3.749515631 | 1.09E-05 |
| ENSG00000184515 | 2.64169488  | 19.06256783 | 7.216036939 | 2.851206724  | 1.28E-05 |
| ENSG00000101336 | 11.16566216 | 0.464947775 | 0.04164086  | -4.585856325 | 1.33E-05 |
| ENSG00000106333 | 1079.284272 | 229.9094265 | 0.21302027  | -2.230937381 | 1.63E-05 |
| ENSG00000163689 | 89.71579429 | 16.58230113 | 0.184831459 | -2.435717768 | 1.65E-05 |
| ENSG00000186642 | 364.4990659 | 58.80390913 | 0.16132801  | -2.631931148 | 1.67E-05 |
| ENSG00000169116 | 1289.092598 | 240.0171457 | 0.186190772 | -2.425146525 | 1.76E-05 |
| ENSG00000197859 | 48.15930885 | 2.220965875 | 0.046117063 | -4.438555556 | 1.79E-05 |

|                 |             |             |             |              |             |
|-----------------|-------------|-------------|-------------|--------------|-------------|
| ENSG00000094755 | 51.61318418 | 4.30072303  | 0.083326055 | -3.585088509 | 2.16E-05    |
| ENSG00000095596 | 2200.951427 | 164.5781802 | 0.074775926 | -3.741282326 | 2.69E-05    |
| ENSG00000221869 | 88.18665484 | 9.749195809 | 0.110551827 | -3.177205227 | 2.84E-05    |
| ENSG00000002745 | 7.626332309 | 0           | 0           | -Inf         | 3.24E-05    |
| ENSG00000081985 | 17.40846618 | 3.893481217 | 0.223654467 | -2.160656525 | 3.32E-05    |
| ENSG00000173918 | 135.9819946 | 9.475246235 | 0.069680153 | -3.843108391 | 3.37E-05    |
| ENSG00000140563 | 19.96700506 | 4.017835256 | 0.201223731 | -2.313127638 | 3.43E-05    |
| ENSG00000110675 | 642.5832409 | 124.024488  | 0.193009217 | -2.373258354 | 4.06E-05    |
| ENSG00000096696 | 394.8849108 | 111.7364769 | 0.282959601 | -1.821332004 | 4.16E-05    |
| ENSG00000176092 | 32.07593    | 126.6936605 | 3.949804745 | 1.981781337  | 4.19E-05    |
| ENSG00000170955 | 24.24068354 | 3.109145242 | 0.128261451 | -2.962840463 | 4.29E-05    |
| ENSG00000120820 | 153.1708587 | 44.27846288 | 0.289078897 | -1.7904648   | 4.38E-05    |
| ENSG00000198959 | 99.00907537 | 6.126542113 | 0.061878591 | -4.014415836 | 4.50E-05    |
| ENSG00000078596 | 10.76329307 | 2.339757733 | 0.217383074 | -2.201688483 | 4.56E-05    |
| ENSG00000183873 | 80.01196823 | 23.23021764 | 0.290334286 | -1.784213145 | 4.71E-05    |
| ENSG00000203805 | 65.16430827 | 2.826923893 | 0.043381476 | -4.526777041 | 4.94E-05    |
| ENSG00000058404 | 33.5775371  | 6.914364039 | 0.205922311 | -2.279827945 | 5.10E-05    |
| ENSG00000103710 | 41.15845112 | 12.67358271 | 0.30792176  | -1.699364272 | 5.19E-05    |
| ENSG00000145832 | 5.057219789 | 0.155660692 | 0.030779895 | -5.021867896 | 5.35E-05    |
| ENSG00000165025 | 17.51157599 | 3.63868063  | 0.207787159 | -2.266821593 | 5.61E-05    |
| ENSG00000227533 | 26.10901273 | 145.808584  | 5.584607337 | 2.481455846  | 5.82E-05    |
| ENSG00000157227 | 4648.244624 | 1432.123349 | 0.308099824 | -1.698530238 | 6.52E-05    |
| ENSG00000014257 | 7.409130083 | 0.321333957 | 0.043369998 | -4.527158813 | 6.97E-05    |
| ENSG00000164116 | 138.2384518 | 15.05994131 | 0.108941768 | -3.198370913 | 7.32E-05    |
| ENSG00000140459 | 0.220266052 | 3.939707192 | 17.88612981 | 4.160769347  | 7.52E-05    |
| ENSG00000155926 | 12.48763462 | 0.941289379 | 0.075377716 | -3.729718104 | 7.85E-05    |
| ENSG00000127824 | 38.09712197 | 8.95274018  | 0.234997809 | -2.089280791 | 7.96E-05    |
| ENSG00000081923 | 42.91465932 | 11.10729387 | 0.258822837 | -1.949963177 | 8.22E-05    |
| ENSG00000183715 | 565.3978543 | 99.31345821 | 0.175652344 | -2.509205269 | 8.54E-05    |
| ENSG00000024422 | 475.852664  | 95.05537052 | 0.199757988 | -2.323674903 | 8.88E-05    |
| ENSG00000231689 | 20.12283635 | 140.36035   | 6.975177233 | 2.802229875  | 9.41E-05    |
| ENSG00000120675 | 76.54860535 | 15.70023088 | 0.205101462 | -2.285590318 | 9.48E-05    |
| ENSG00000130720 | 102.5164638 | 20.57680535 | 0.200717081 | -2.316764701 | 9.69E-05    |
| ENSG00000101417 | 61.10694975 | 8.806646099 | 0.144118568 | -2.794671872 | 9.88E-05    |
| ENSG00000185436 | 10.15366428 | 1.866831688 | 0.183857929 | -2.443336698 | 1.02E-04    |
| ENSG00000228592 | 3.810990905 | 222.9892862 | 58.51215387 | 5.870664421  | 0.000107755 |
| ENSG00000169129 | 1036.496755 | 201.6944584 | 0.194592465 | -2.361472249 | 0.000117612 |
| ENSG00000179057 | 48.04175028 | 8.21140058  | 0.170922178 | -2.548588491 | 0.000118579 |
| ENSG00000248746 | 36.37277296 | 2.433888955 | 0.066915133 | -3.901523664 | 0.000121682 |
| ENSG00000008516 | 276.8475657 | 51.69087029 | 0.186712389 | -2.421110439 | 0.000123853 |
| ENSG00000175874 | 2.207337845 | 11.54567471 | 5.230587942 | 2.386973121  | 0.000131701 |
| ENSG00000079102 | 552.0130693 | 132.1285548 | 0.239357657 | -2.062760138 | 0.000132631 |
| ENSG00000119681 | 690.1775161 | 119.3662488 | 0.172950069 | -2.531572508 | 1.36E-04    |

|                 |             |             |             |              |             |
|-----------------|-------------|-------------|-------------|--------------|-------------|
| ENSG00000136153 | 364.415901  | 104.9651444 | 0.288036675 | -1.795675577 | 0.00013908  |
| ENSG00000160801 | 70.83558886 | 8.938374367 | 0.126184797 | -2.986389998 | 0.000139827 |
| ENSG00000205517 | 14.47657965 | 54.77628799 | 3.783786593 | 1.919830722  | 0.000156461 |
| ENSG00000132386 | 940.8518896 | 301.9954343 | 0.320980845 | -1.639440891 | 0.000156889 |
| ENSG00000198502 | 2.544535751 | 0           | 0           | -Inf         | 0.000166835 |
| ENSG00000142273 | 0.814249537 | 5.545269365 | 6.810282487 | 2.767714642  | 0.000166932 |
| ENSG00000225548 | 3.215177141 | 0           | 0           | -Inf         | 0.000168557 |
| ENSG00000184254 | 11.76972185 | 0.833816184 | 0.070844171 | -3.819207041 | 0.000177929 |
| ENSG00000204959 | 3.518138687 | 0           | 0           | -Inf         | 0.000197325 |
| ENSG00000074370 | 74.616738   | 18.64897392 | 0.249930169 | -2.000403037 | 0.00019964  |
| ENSG00000198203 | 20.71242382 | 3.51573401  | 0.169740347 | -2.558598562 | 0.00021209  |
| ENSG00000168843 | 96.87129834 | 12.96903133 | 0.133878987 | -2.900998551 | 0.000212845 |
| ENSG00000185652 | 157.3723772 | 13.9588784  | 0.088699673 | -3.494927403 | 0.000220786 |
| ENSG00000249158 | 300.3810102 | 86.38553538 | 0.28758654  | -1.797931941 | 0.000230873 |
| ENSG00000259370 | 22.09717936 | 3.534834851 | 0.159967695 | -2.644147507 | 0.000238689 |
| ENSG00000164418 | 294.5399029 | 90.18533668 | 0.306190556 | -1.707498309 | 0.00024672  |
| ENSG00000223509 | 59.58994619 | 16.4963948  | 0.276831846 | -1.852918179 | 0.000253736 |
| ENSG00000156049 | 35.34548404 | 9.888886582 | 0.279777936 | -1.837645901 | 0.000272781 |
| ENSG00000140470 | 14.5438488  | 0.960376841 | 0.066033198 | -3.920664681 | 0.000288592 |
| ENSG00000135636 | 576.9475113 | 176.6694217 | 0.306214029 | -1.707387716 | 0.000290502 |
| ENSG00000204335 | 91.68374108 | 1.70356352  | 0.018580868 | -5.750038266 | 0.000306155 |
| ENSG00000163827 | 6.916918513 | 49.41557141 | 7.144159833 | 2.836764358  | 0.000320263 |
| ENSG00000203685 | 86.64117296 | 22.69369391 | 0.261927362 | -1.932761315 | 0.000325342 |
| ENSG00000013297 | 71.28691158 | 11.16225309 | 0.156582083 | -2.675008956 | 0.000333325 |
| ENSG00000189143 | 27.65030865 | 79.79640324 | 2.885913653 | 1.529028135  | 0.000342345 |
| ENSG00000170961 | 380.2073301 | 25.87957582 | 0.068067009 | -3.87690047  | 0.0003455   |
| ENSG00000234779 | 7.535811305 | 0.941289379 | 0.124908831 | -3.001052619 | 0.000361664 |
| ENSG00000166482 | 411.1743846 | 43.75917714 | 0.106424862 | -3.232092875 | 0.000363444 |
| ENSG00000213120 | 18.69377402 | 72.16927881 | 3.860605072 | 1.948826979  | 0.000363604 |
| ENSG00000143768 | 5.57020058  | 0.622642769 | 0.111781032 | -3.161252695 | 0.000367124 |
| ENSG00000121898 | 13.08994361 | 2.888084954 | 0.220633873 | -2.180273797 | 0.000376977 |
| ENSG00000131914 | 4900.496649 | 17147.13422 | 3.499060494 | 1.806967607  | 0.000379513 |
| ENSG00000180938 | 41.96838063 | 143.5249073 | 3.419834294 | 1.773926422  | 0.000381202 |
| ENSG00000127152 | 34.04001906 | 1.427358918 | 0.04193179  | -4.575811785 | 0.000386434 |
| ENSG00000167941 | 14.8092756  | 0.620608467 | 0.04190674  | -4.576673882 | 0.000394297 |
| ENSG00000127083 | 4.939193766 | 0.155660692 | 0.031515405 | -4.987798983 | 0.00039515  |
| ENSG00000163131 | 13.69413697 | 2.519512174 | 0.183984736 | -2.442342015 | 0.000404117 |
| ENSG00000204963 | 52.17732017 | 14.09543885 | 0.270144937 | -1.888194453 | 4.16E-04    |
| ENSG00000164692 | 22666.63738 | 75.64050675 | 0.003337085 | -8.227195638 | 0.000429199 |
| ENSG00000152969 | 1.085776262 | 6.687434949 | 6.159127976 | 2.622726105  | 0.000439773 |
| ENSG00000138316 | 364.1865686 | 29.5288175  | 0.081081567 | -3.624482227 | 0.00044642  |
| ENSG00000256043 | 143.2249963 | 14.50852244 | 0.101298815 | -3.303310794 | 0.000449047 |
| ENSG00000064270 | 43.49871799 | 10.46459741 | 0.240572548 | -2.055456072 | 0.000453642 |

|                 |             |             |             |              |             |
|-----------------|-------------|-------------|-------------|--------------|-------------|
| ENSG00000054179 | 36.14380177 | 1.236210648 | 0.034202563 | -4.869751761 | 0.000454066 |
| ENSG00000184599 | 8.991311908 | 0.977430002 | 0.108708274 | -3.201466339 | 4.57E-04    |
| ENSG00000164488 | 140.3867498 | 17.86546119 | 0.127258885 | -2.974161714 | 0.000466373 |
| ENSG00000070886 | 5.392402834 | 0.542963519 | 0.100690459 | -3.312001103 | 0.000472617 |
| ENSG00000130540 | 176.6121856 | 53.14383143 | 0.300906935 | -1.732610739 | 0.000518881 |
| ENSG00000102452 | 200.2210544 | 61.50451908 | 0.307183074 | -1.702829368 | 0.000518932 |
| ENSG00000113209 | 1615.788913 | 152.2131504 | 0.094203611 | -3.408073826 | 0.00052175  |
| ENSG00000120251 | 269.0256463 | 109.9669226 | 0.408759998 | -1.290674077 | 0.000526701 |
| ENSG00000164344 | 15.10846195 | 3.452982221 | 0.228546243 | -2.12944199  | 5.43E-04    |
| ENSG00000184564 | 61.67831306 | 4.764276169 | 0.077243944 | -3.694434358 | 0.000543703 |
| ENSG00000154262 | 3.352334612 | 0.316327671 | 0.094360411 | -3.405674492 | 0.000543785 |
| ENSG00000050555 | 3233.722533 | 184.1966531 | 0.056961181 | -4.133877142 | 0.000567039 |
| ENSG00000006071 | 28.7003408  | 4.762129547 | 0.165925888 | -2.591389096 | 0.000571315 |
| ENSG00000112164 | 10.83993765 | 39.93906145 | 3.684436454 | 1.881443972  | 0.000588267 |
| ENSG00000137460 | 175.7900988 | 740.0888452 | 4.210071274 | 2.073844657  | 0.000591331 |
| ENSG00000065717 | 80.46814397 | 10.94390213 | 0.136002915 | -2.878290523 | 0.000626265 |
| ENSG00000184584 | 168.6842147 | 2.5790935   | 0.015289477 | -6.031317087 | 0.000640343 |
| ENSG00000006638 | 13.16521336 | 1.23714833  | 0.093971005 | -3.411640512 | 0.00064327  |
| ENSG00000184363 | 4.992855744 | 0.512482227 | 0.102643107 | -3.284291347 | 0.000666168 |
| ENSG00000186369 | 21.1586994  | 2.806898748 | 0.132659323 | -2.914202021 | 0.000667731 |
| ENSG00000170577 | 81.19572818 | 5.964569044 | 0.073459148 | -3.766914019 | 0.000675423 |
| ENSG00000199916 | 20.91442596 | 5.067917299 | 0.242316825 | -2.045033514 | 6.76E-04    |
| ENSG00000146477 | 104.3567062 | 4.853202627 | 0.046505901 | -4.426442409 | 6.80E-04    |
| ENSG00000183117 | 673.9928511 | 10.12206891 | 0.015018066 | -6.057157183 | 0.000697582 |
| ENSG00000182326 | 146.2934455 | 47.94950818 | 0.327762519 | -1.60927721  | 0.000719316 |
| ENSG00000232729 | 29.56663519 | 8.031116406 | 0.271627676 | -1.880297612 | 0.000722906 |
| ENSG00000162496 | 78.51222654 | 29.01629343 | 0.369576749 | -1.436054099 | 0.000728282 |
| ENSG00000147394 | 265.8258693 | 687.2531793 | 2.585351009 | 1.370360166  | 0.000742001 |
| ENSG00000228974 | 24.47925649 | 4.859269907 | 0.198505617 | -2.332748265 | 0.000755967 |
| ENSG00000255043 | 4.50112751  | 0.537957232 | 0.119516106 | -3.064723046 | 0.000787051 |
| ENSG00000182674 | 21.03774429 | 64.0682074  | 3.045393389 | 1.606628601  | 0.000801973 |
| ENSG00000189127 | 10.63603162 | 1.942813129 | 0.182663347 | -2.452740924 | 8.57E-04    |
| ENSG00000129270 | 12.34168638 | 0.502469655 | 0.040713209 | -4.618359257 | 0.000866534 |
| ENSG00000196126 | 11.37860586 | 1.078515654 | 0.094784516 | -3.399204783 | 0.000893299 |
| ENSG00000119866 | 290.4247095 | 65.41889818 | 0.225252522 | -2.150384838 | 0.000926003 |
| ENSG00000013588 | 33.38619975 | 6.220093069 | 0.18630731  | -2.424243813 | 0.000948187 |
| ENSG00000185681 | 5.01313829  | 0.160666978 | 0.032049181 | -4.963568682 | 0.000992999 |
| ENSG00000127507 | 26.70618055 | 5.210306411 | 0.195097401 | -2.357733537 | 0.001017882 |
| ENSG00000228960 | 1.79023712  | 0           | 0           | -Inf         | 0.001043749 |
| ENSG00000020633 | 8.031486468 | 1.055445746 | 0.1314135   | -2.927814607 | 0.001059687 |
| ENSG00000116983 | 171.2404067 | 602.5609346 | 3.518801118 | 1.815083975  | 0.001098921 |
| ENSG00000114757 | 176.5705691 | 74.36579249 | 0.421167541 | -1.24753384  | 0.001136442 |
| ENSG00000147246 | 57.33421282 | 2.849638771 | 0.049702239 | -4.330545334 | 0.001139989 |

|                 |             |             |             |              |             |
|-----------------|-------------|-------------|-------------|--------------|-------------|
| ENSG00000165816 | 6.49831434  | 0.960376841 | 0.14778861  | -2.758393012 | 0.001175251 |
| ENSG00000121691 | 892.8628253 | 286.2385831 | 0.320585173 | -1.641220393 | 0.001179252 |
| ENSG00000115380 | 742.6353274 | 156.200186  | 0.210332286 | -2.249257775 | 0.001213416 |
| ENSG00000099337 | 31.90146711 | 7.587217616 | 0.237832874 | -2.071979951 | 1.22E-03    |
| ENSG00000168016 | 252.9070292 | 81.14180023 | 0.320836477 | -1.640089919 | 1.24E-03    |
| ENSG00000239828 | 12.6227257  | 3.59098724  | 0.284485881 | -1.813571042 | 0.00125658  |
| ENSG00000231672 | 113.3023166 | 7.619362414 | 0.067248073 | -3.894363271 | 0.00129638  |
| ENSG00000158816 | 2.329622402 | 10.59762938 | 4.549076011 | 2.185573541  | 0.001339971 |
| ENSG00000138964 | 2.629612087 | 33.91353218 | 12.89678137 | 3.688939154  | 0.001342899 |
| ENSG00000260359 | 3.888195566 | 0.148620104 | 0.038223413 | -4.709399594 | 0.001356289 |
| ENSG00000204252 | 8.361480462 | 25.75997266 | 3.080790869 | 1.623300752  | 0.001387458 |
| ENSG00000185338 | 96.24137159 | 35.68108696 | 0.370745828 | -1.431497638 | 1.41E-03    |
| ENSG00000112343 | 94.51353592 | 25.29440422 | 0.267627319 | -1.901702704 | 0.001435752 |
| ENSG00000204965 | 26.36805118 | 7.389558491 | 0.280246668 | -1.835230874 | 0.001436086 |
| ENSG00000172986 | 112.9611439 | 8.319136164 | 0.073645998 | -3.763249063 | 0.001453161 |
| ENSG00000186377 | 2.8365637   | 0.321333957 | 0.113282828 | -3.141998912 | 0.001455491 |
| ENSG00000120328 | 146.8349498 | 44.28126134 | 0.301571672 | -1.729427178 | 0.001457597 |
| ENSG00000202198 | 26.4222534  | 6.030328442 | 0.22822915  | -2.131445025 | 0.00146515  |
| ENSG00000076641 | 795.9592007 | 280.669271  | 0.35261766  | -1.503823364 | 0.001486451 |
| ENSG00000255373 | 12.86116492 | 1.170612574 | 0.091019171 | -3.457685737 | 0.001492725 |
| ENSG00000106089 | 247.200747  | 90.59887955 | 0.366499214 | -1.44811799  | 0.001514085 |
| ENSG00000143341 | 2253.429192 | 472.7426511 | 0.20978811  | -2.252995181 | 0.001514674 |
| ENSG00000000005 | 87.81961498 | 0.835197441 | 0.009510375 | -6.716282108 | 0.001541797 |
| ENSG00000127951 | 12.64858724 | 2.99100643  | 0.236469605 | -2.080273338 | 0.001564763 |
| ENSG00000251896 | 4.281727434 | 0.507475941 | 0.118521309 | -3.076781628 | 0.001580934 |
| ENSG00000229327 | 1.844557814 | 0           | 0           | -Inf         | 0.001587925 |
| ENSG00000177234 | 2.896790215 | 0.155660692 | 0.053735577 | -4.217978625 | 0.001605234 |
| ENSG00000125851 | 1761.234936 | 367.7883596 | 0.208824134 | -2.259639642 | 0.001605828 |
| ENSG00000187210 | 35.42937401 | 116.7057454 | 3.294039159 | 1.719857706  | 0.00161389  |
| ENSG00000156687 | 249.7499859 | 111.2082995 | 0.445278501 | -1.167220136 | 0.001614409 |
| ENSG00000145861 | 56.69120736 | 18.39583148 | 0.324491792 | -1.623746108 | 0.001632384 |
| ENSG00000111321 | 6.397766459 | 1.897683774 | 0.296616606 | -1.753328725 | 0.001692902 |
| ENSG00000167994 | 216.4653098 | 75.91470925 | 0.350701502 | -1.511684486 | 0.001698218 |
| ENSG00000223599 | 10.7215829  | 38.64743599 | 3.604639013 | 1.849854788  | 0.001786437 |
| ENSG00000139508 | 24.78075152 | 7.870672276 | 0.317612332 | -1.654661166 | 0.001790238 |
| ENSG00000172782 | 0           | 2.385419208 | Inf         | Inf          | 1.80E-03    |
| ENSG00000134917 | 18.23827542 | 7.088693253 | 0.388671247 | -1.36337771  | 0.001805828 |
| ENSG00000259153 | 32.70064296 | 91.67379967 | 2.80342499  | 1.487190469  | 0.001837678 |
| ENSG00000236670 | 6.446831184 | 0.781275446 | 0.121187514 | -3.044687027 | 0.001885632 |
| ENSG00000065361 | 63.82041011 | 163.5899544 | 2.563285854 | 1.357994375  | 0.001897395 |
| ENSG00000237515 | 17.42103184 | 136.2339366 | 7.820084245 | 2.96718415   | 0.001903971 |
| ENSG00000268747 | 3.674382094 | 0           | 0           | -Inf         | 0.001904333 |
| ENSG00000132681 | 16.27089106 | 3.017617596 | 0.185461115 | -2.430811363 | 1.92E-03    |



|                 |             |             |             |              |             |
|-----------------|-------------|-------------|-------------|--------------|-------------|
| ENSG00000154783 | 53.6689109  | 8.975748564 | 0.167242979 | -2.579982444 | 0.001938352 |
| ENSG00000146070 | 17.9833319  | 5.248754981 | 0.29186777  | -1.776613187 | 0.00196247  |
| ENSG00000169403 | 23.30294809 | 8.112686786 | 0.348139933 | -1.522260789 | 0.001969734 |
| ENSG00000050628 | 53.95410357 | 2.778736395 | 0.051501855 | -4.279231806 | 0.002018247 |
| ENSG00000170743 | 16.26011666 | 50.57222116 | 3.11020039  | 1.637007536  | 0.002036461 |
| ENSG00000207971 | 3.321160175 | 0.155660692 | 0.046869372 | -4.41521072  | 0.00208357  |
| ENSG00000148942 | 8.945417258 | 0.304280796 | 0.034015271 | -4.877673587 | 0.002143586 |
| ENSG00000250846 | 10.02518812 | 0.755147395 | 0.07532501  | -3.730727231 | 0.002156582 |
| ENSG00000253477 | 68.00375916 | 26.93721872 | 0.396113672 | -1.336013599 | 0.002156609 |
| ENSG00000196090 | 0.322047482 | 120.3334112 | 373.6511479 | 8.545548144  | 0.002183489 |
| ENSG00000164695 | 1.543424642 | 0           | 0           | -Inf         | 0.002209347 |
| ENSG00000130032 | 13.09081483 | 32.05350854 | 2.448549534 | 1.291927382  | 0.002235862 |
| ENSG00000101425 | 14.91033936 | 0.297240208 | 0.019935174 | -5.648539998 | 2.25E-03    |
| ENSG00000135525 | 101.7453778 | 314.3434694 | 3.089511053 | 1.627378535  | 0.002278528 |
| ENSG00000147872 | 1049.495942 | 3438.586885 | 3.276417515 | 1.712119212  | 0.002302471 |
| ENSG00000171385 | 565.4557462 | 161.775298  | 0.286097186 | -1.805422785 | 0.002312643 |
| ENSG00000163251 | 851.9446447 | 363.5400228 | 0.426717892 | -1.228645492 | 0.002334253 |
| ENSG00000116194 | 158.4769747 | 38.22863784 | 0.241225187 | -2.051547545 | 0.00237651  |
| ENSG00000028116 | 139.1978084 | 46.24015273 | 0.332190235 | -1.589918428 | 0.002452857 |
| ENSG00000254154 | 5.043081082 | 0           | 0           | -Inf         | 0.002516325 |
| ENSG00000133048 | 2.050360231 | 9.957348498 | 4.856389793 | 2.279884223  | 0.002533053 |
| ENSG00000163191 | 1611.850009 | 488.6778967 | 0.30317827  | -1.721761743 | 0.002549247 |
| ENSG00000104324 | 85.66502432 | 20.20364072 | 0.235844686 | -2.084091003 | 0.002613611 |
| ENSG00000103196 | 49.75497592 | 13.74615201 | 0.27627693  | -1.855812996 | 0.002659542 |
| ENSG00000165621 | 0.681303185 | 5.782275201 | 8.487080831 | 3.085268418  | 0.002664763 |
| ENSG00000133256 | 24.23793656 | 65.55274879 | 2.704551545 | 1.435389394  | 0.002710405 |
| ENSG00000203635 | 1.675961715 | 0           | 0           | -Inf         | 0.002715093 |
| ENSG00000171522 | 84.6348654  | 4.341375831 | 0.051295359 | -4.285027879 | 0.002740339 |
| ENSG00000260838 | 5.247873684 | 22.55709604 | 4.2983306   | 2.10377645   | 0.002783012 |
| ENSG00000011465 | 5529.003973 | 44.8738284  | 0.008116078 | -6.945001526 | 0.002851433 |
| ENSG00000178860 | 51.29967102 | 6.52573612  | 0.127208148 | -2.974737018 | 0.002932742 |
| ENSG00000187720 | 518.1816133 | 190.1258504 | 0.366909681 | -1.446503124 | 0.002942316 |
| ENSG00000182050 | 14.52289278 | 6.111260864 | 0.420801899 | -1.248786879 | 0.002956637 |
| ENSG00000105048 | 123.0625876 | 42.13464843 | 0.342383898 | -1.54631324  | 0.002975777 |
| ENSG00000198542 | 7.815559497 | 1.661035354 | 0.212529296 | -2.234266375 | 0.002977543 |
| ENSG00000170356 | 2.27822996  | 0.148620104 | 0.0652349   | -3.938212187 | 0.00301568  |
| ENSG00000104689 | 4.827244827 | 27.83875651 | 5.767007373 | 2.527822867  | 0.003073506 |
| ENSG00000223503 | 21.1648527  | 50.98586516 | 2.408987479 | 1.268426895  | 0.003123669 |
| ENSG00000234165 | 3.667925709 | 0.502469655 | 0.13699014  | -2.867856042 | 0.003143498 |
| ENSG00000183801 | 101.5560059 | 2.748824377 | 0.027067078 | -5.207317015 | 0.003146452 |
| ENSG00000155846 | 412.7003571 | 164.2346253 | 0.397951256 | -1.329336367 | 0.003216518 |
| ENSG00000156076 | 13.87660318 | 5.037597332 | 0.363028132 | -1.461846744 | 0.003231338 |
| ENSG00000185053 | 7.176368153 | 1.094631132 | 0.152532745 | -2.71280911  | 0.003234383 |

|                 |             |             |             |              |             |
|-----------------|-------------|-------------|-------------|--------------|-------------|
| ENSG00000177374 | 172.1991728 | 39.13380653 | 0.227258969 | -2.13759086  | 0.003266387 |
| ENSG00000198842 | 23.41289489 | 0.507475941 | 0.021675062 | -5.527820091 | 0.003271255 |
| ENSG00000007944 | 631.2702799 | 262.9566084 | 0.416551542 | -1.263433077 | 0.00328001  |
| ENSG00000118515 | 449.2395673 | 191.4273447 | 0.426114168 | -1.230688072 | 0.003292414 |
| ENSG00000156925 | 1496.948617 | 523.894134  | 0.349974694 | -1.514677488 | 0.003322458 |
| ENSG00000161243 | 7.665496868 | 23.67424299 | 3.088415976 | 1.626867081  | 0.003338592 |
| ENSG00000102349 | 17.4109168  | 5.531430898 | 0.317699002 | -1.654267535 | 0.003370804 |
| ENSG00000197635 | 38.72630852 | 104.7650005 | 2.705266898 | 1.435770935  | 0.00342225  |
| ENSG00000250120 | 50.90670827 | 17.043374   | 0.33479623  | -1.578644813 | 0.00342274  |
| ENSG00000254967 | 9.082167662 | 1.187012689 | 0.130697069 | -2.935701312 | 0.003449317 |
| ENSG00000189269 | 17.6073679  | 4.89259987  | 0.277872303 | -1.847506053 | 0.003471012 |
| ENSG00000110786 | 28.54850482 | 89.35014099 | 3.129766043 | 1.646054817  | 0.003527402 |
| ENSG00000165568 | 9.664781319 | 1.270316969 | 0.131437735 | -2.927548567 | 0.003549355 |
| ENSG00000177106 | 24.63282345 | 9.783092659 | 0.397156772 | -1.33221949  | 0.003576422 |
| ENSG00000267605 | 15.78576509 | 3.579026524 | 0.226724933 | -2.140985045 | 0.003591578 |
| ENSG00000242639 | 4.416234164 | 0.19114827  | 0.043283092 | -4.530052622 | 0.003595828 |
| ENSG00000140937 | 6797.031057 | 2549.211785 | 0.375047835 | -1.41485348  | 0.003650125 |
| ENSG00000163435 | 16.23222472 | 4.261164461 | 0.262512658 | -1.929541104 | 0.003669757 |
| ENSG00000140519 | 0.10178143  | 2.731771217 | 26.83958376 | 4.746290393  | 3.68E-03    |
| ENSG00000261553 | 3.250553182 | 0.622642769 | 0.191549787 | -2.384208674 | 0.003714346 |
| ENSG00000239800 | 0           | 2.354567121 | Inf         | Inf          | 0.003719512 |
| ENSG00000150556 | 14.44513721 | 3.843751138 | 0.266093086 | -1.90999707  | 0.003743535 |
| ENSG00000224237 | 10.91949002 | 119.1484028 | 10.91153548 | 3.447782228  | 0.003782421 |
| ENSG00000213115 | 12.30909618 | 175.5051492 | 14.25816702 | 3.833716621  | 0.003823289 |
| ENSG00000224940 | 49.2182299  | 19.27903456 | 0.391705159 | -1.352159966 | 0.003894986 |
| ENSG00000122641 | 203.4620573 | 20.26012026 | 0.099576897 | -3.328045135 | 0.003977683 |
| ENSG00000125878 | 15.07124581 | 3.93795514  | 0.261289292 | -1.936280095 | 0.003996444 |
| ENSG00000168743 | 16.27299343 | 2.538599637 | 0.156000778 | -2.68037487  | 0.003998689 |
| ENSG00000102575 | 9.051941994 | 2.205218805 | 0.243618309 | -2.03730553  | 0.004043056 |
| ENSG00000073350 | 78.9201297  | 214.2026038 | 2.714169434 | 1.440510785  | 0.004053053 |
| ENSG00000183379 | 20.55205063 | 3.376769061 | 0.164303267 | -2.605566928 | 0.004110844 |
| ENSG00000169242 | 125.5041287 | 39.82903179 | 0.317352363 | -1.655842511 | 0.004143682 |
| ENSG00000004948 | 73.11345768 | 18.76254116 | 0.256622266 | -1.962281745 | 4.16E-03    |
| ENSG00000182771 | 195.646346  | 72.54839227 | 0.370813939 | -1.431232618 | 4.19E-03    |
| ENSG00000144406 | 1285.238744 | 463.2996385 | 0.360477492 | -1.472018915 | 0.004200807 |
| ENSG00000174482 | 31.61721535 | 94.90862593 | 3.001802179 | 1.585828905  | 0.004316825 |
| ENSG00000110090 | 1275.738795 | 340.1532968 | 0.2666324   | -1.907075993 | 0.00432497  |
| ENSG00000143502 | 44.33464129 | 17.49451655 | 0.394601513 | -1.341531606 | 0.004499987 |
| ENSG00000125845 | 114.9484399 | 36.17704295 | 0.314724088 | -1.667840491 | 0.00450446  |
| ENSG00000149451 | 31.15696649 | 3.624440515 | 0.116328415 | -3.103724559 | 0.004545774 |
| ENSG00000259498 | 152.0901999 | 56.45475427 | 0.371192584 | -1.429760209 | 0.004557099 |
| ENSG00000172935 | 8.516551056 | 49.0252653  | 5.756469371 | 2.525184231  | 0.004563371 |
| ENSG00000216901 | 0.66235663  | 4.746296319 | 7.165771585 | 2.841122057  | 0.004597063 |

|                 |             |             |             |              |             |
|-----------------|-------------|-------------|-------------|--------------|-------------|
| ENSG00000155052 | 114.7961836 | 39.24490902 | 0.341865973 | -1.548497261 | 0.004623737 |
| ENSG00000138379 | 9.439170177 | 1.865894006 | 0.19767564  | -2.338792999 | 0.004629133 |
| ENSG00000197479 | 204.5984946 | 79.24530034 | 0.387321033 | -1.368398246 | 0.004652765 |
| ENSG00000176956 | 132.7407452 | 37.85838279 | 0.285205441 | -1.809926589 | 0.004726531 |
| ENSG00000223814 | 12.92646697 | 1.879816244 | 0.145423823 | -2.781664467 | 4.80E-03    |
| ENSG00000182179 | 126.7821765 | 35.4100469  | 0.279298304 | -1.840121281 | 0.004854866 |
| ENSG00000228956 | 9.216251482 | 31.0976305  | 3.37421679  | 1.754552668  | 0.004894709 |
| ENSG00000250522 | 3.185431313 | 0.19114827  | 0.060007029 | -4.058724681 | 0.004970684 |
| ENSG00000186288 | 0           | 1.948916036 | Inf         | Inf          | 0.004974475 |
| ENSG00000005187 | 122.8089519 | 24.31016449 | 0.197951079 | -2.336784167 | 0.005002867 |
| ENSG00000151617 | 1772.567228 | 73.57919091 | 0.041509958 | -4.590398723 | 0.005018335 |
| ENSG00000125816 | 14.14761878 | 0           | 0           | -Inf         | 0.005055156 |
| ENSG00000082482 | 338.1692179 | 120.7052609 | 0.356937458 | -1.486256786 | 0.005096451 |
| ENSG00000221819 | 5.812471304 | 0.542963519 | 0.09341354  | -3.420224516 | 0.00511746  |
| ENSG00000249803 | 43.10060675 | 0           | 0           | -Inf         | 0.005126359 |
| ENSG00000107859 | 9.525214621 | 0.972423716 | 0.102089428 | -3.292094616 | 0.005177929 |
| ENSG00000159403 | 63.33883039 | 25.25059996 | 0.398659082 | -1.32677256  | 0.005193602 |
| ENSG00000179520 | 175.6341011 | 20.34089614 | 0.115814048 | -3.11011784  | 0.005205039 |
| ENSG00000268913 | 5.213859808 | 0.668142919 | 0.128147465 | -2.964123151 | 5.21E-03    |
| ENSG00000111907 | 115.6722888 | 54.54802416 | 0.471573829 | -1.084444439 | 0.005280522 |
| ENSG00000207949 | 30.86229035 | 0           | 0           | -Inf         | 0.005294787 |
| ENSG00000216775 | 188.2328205 | 66.45751421 | 0.353060184 | -1.502013964 | 0.005307841 |
| ENSG00000150672 | 110.5503081 | 341.7008767 | 3.090908407 | 1.628030904  | 0.005318077 |
| ENSG00000103175 | 90.81723116 | 2.907468046 | 0.032014498 | -4.965130812 | 0.005351889 |
| ENSG00000126778 | 137.7971307 | 2.088832045 | 0.015158748 | -6.043705542 | 0.005388591 |
| ENSG00000189120 | 17.42668043 | 3.656956109 | 0.209848119 | -2.252582563 | 0.005402128 |
| ENSG00000115896 | 148.4367471 | 63.4968535  | 0.427770446 | -1.225091283 | 5.42E-03    |
| ENSG00000187595 | 130.491954  | 58.48330261 | 0.448175545 | -1.157864165 | 0.005478085 |
| ENSG00000115138 | 4.543188439 | 0.627649055 | 0.138151667 | -2.855675126 | 0.005479038 |
| ENSG00000135925 | 2.544535751 | 0           | 0           | -Inf         | 0.005614214 |
| ENSG00000070601 | 11.25920054 | 1.652613509 | 0.146778939 | -2.768283121 | 0.005627379 |
| ENSG00000182667 | 890.7863313 | 340.6064259 | 0.382366022 | -1.386973768 | 0.005697241 |
| ENSG00000116703 | 8.367999486 | 2.149423833 | 0.256862328 | -1.960932775 | 0.005715657 |
| ENSG00000250284 | 39.7409926  | 0.693617925 | 0.017453463 | -5.840342915 | 0.005730519 |
| ENSG00000118194 | 64.10659454 | 17.48506267 | 0.272749829 | -1.874349805 | 0.005732446 |
| ENSG00000161921 | 24.09734751 | 7.057324812 | 0.292867288 | -1.771681036 | 5.78E-03    |
| ENSG00000123610 | 35.91636327 | 1.252610764 | 0.034875768 | -4.84163119  | 0.005824839 |
| ENSG00000136842 | 2.775054318 | 18.40344927 | 6.631743802 | 2.729388274  | 0.005827329 |
| ENSG00000237172 | 109.5863317 | 45.28688643 | 0.413253056 | -1.274902608 | 0.005974256 |
| ENSG00000164438 | 84.20102969 | 10.99118671 | 0.130535063 | -2.937490714 | 0.005998176 |
| ENSG00000222040 | 10.92759828 | 21.0688982  | 1.928044722 | 0.947138516  | 0.006010208 |
| ENSG00000091664 | 157.8879334 | 58.94935698 | 0.373362015 | -1.421352936 | 0.006016432 |
| ENSG00000182310 | 312.9235969 | 129.5821816 | 0.414101662 | -1.271943101 | 0.006018328 |

|                 |             |             |             |              |             |
|-----------------|-------------|-------------|-------------|--------------|-------------|
| ENSG00000204103 | 55.03880201 | 24.85932586 | 0.451669094 | -1.146661895 | 0.006079272 |
| ENSG00000178814 | 98.1166637  | 239.1143824 | 2.437041512 | 1.285130826  | 0.006097859 |
| ENSG00000142173 | 8597.803312 | 2832.399109 | 0.32943288  | -1.601943539 | 0.006106122 |
| ENSG00000170382 | 517.0232327 | 171.7525498 | 0.332195033 | -1.589897593 | 0.006186822 |
| ENSG00000151572 | 355.8673258 | 128.0763248 | 0.359899085 | -1.474335662 | 0.006210418 |
| ENSG00000131203 | 5.443703001 | 1.42939322  | 0.262577371 | -1.929185507 | 0.006271358 |
| ENSG00000105976 | 169.9476643 | 69.39067313 | 0.40830613  | -1.292276867 | 0.006290811 |
| ENSG00000170017 | 4841.127457 | 2010.320557 | 0.415258754 | -1.267917513 | 0.006307881 |
| ENSG00000231806 | 7.88549302  | 51.11289106 | 6.481889076 | 2.696414332  | 0.006308863 |
| ENSG00000231711 | 4.888754209 | 0.686577337 | 0.140440142 | -2.831972732 | 6.33E-03    |
| ENSG00000003249 | 614.4477877 | 252.2542766 | 0.41053818  | -1.284411695 | 0.006366726 |
| ENSG00000200312 | 38.90464044 | 8.846033209 | 0.227377328 | -2.136839683 | 0.006516866 |
| ENSG00000175471 | 571.0579384 | 1374.04749  | 2.406143751 | 1.266722836  | 6.57E-03    |
| ENSG00000158156 | 259.8883354 | 623.9365596 | 2.400787087 | 1.263507464  | 0.00656974  |
| ENSG00000121904 | 16.2539094  | 159.5142466 | 9.813900315 | 3.294826617  | 0.006678982 |
| ENSG00000126947 | 1035.237581 | 376.9878818 | 0.364155909 | -1.457371842 | 0.006731716 |
| ENSG00000145536 | 569.7276193 | 250.0002684 | 0.438806651 | -1.188342703 | 0.006732219 |
| ENSG00000155792 | 37.97847401 | 260.9218044 | 6.870255092 | 2.780363667  | 0.00673813  |
| ENSG00000181195 | 89.72312531 | 2.349929243 | 0.026190898 | -5.254790652 | 0.006757227 |
| ENSG00000100678 | 255.4611379 | 106.6336237 | 0.417416225 | -1.260441417 | 0.006806223 |
| ENSG00000267053 | 15.11133583 | 3.952691748 | 0.261571299 | -1.934723844 | 0.006821547 |
| ENSG00000112619 | 4.054552107 | 0.19114827  | 0.047144115 | -4.406778505 | 0.006821945 |
| ENSG00000177409 | 20.7135892  | 2.16008945  | 0.104283687 | -3.261414601 | 0.006865012 |
| ENSG00000139629 | 21.73161582 | 7.767108748 | 0.357410549 | -1.484345877 | 0.006930653 |
| ENSG00000147255 | 57.04834565 | 23.16399268 | 0.406041445 | -1.300301104 | 0.006953586 |
| ENSG00000109193 | 16.68570195 | 0           | 0           | -Inf         | 0.006975765 |
| ENSG00000158747 | 797.6019052 | 330.0689614 | 0.413826696 | -1.272901377 | 0.006996978 |
| ENSG00000181804 | 97.62991966 | 33.80155057 | 0.346221227 | -1.530233915 | 0.007072698 |
| ENSG00000110719 | 91.10523755 | 42.81900551 | 0.469994993 | -1.089282707 | 0.007151933 |
| ENSG00000188659 | 92.72037842 | 27.59932027 | 0.29766186  | -1.748253719 | 0.007169913 |
| ENSG00000172987 | 2.377494322 | 0           | 0           | -Inf         | 0.007239458 |
| ENSG00000170430 | 69.90568974 | 9.937258916 | 0.142152362 | -2.814490024 | 0.007298322 |
| ENSG00000118946 | 4042.51566  | 1606.033532 | 0.397285668 | -1.331751347 | 0.007397365 |
| ENSG00000187566 | 13.71725817 | 1.280329542 | 0.093337132 | -3.421405047 | 0.007408085 |
| ENSG00000229427 | 11.33745071 | 2.558415311 | 0.225660545 | -2.147773895 | 0.007410129 |
| ENSG00000132854 | 193.1032192 | 14.8870819  | 0.077093908 | -3.697239319 | 0.00741079  |
| ENSG00000172985 | 340.5244031 | 124.3808618 | 0.365262697 | -1.452993672 | 0.007444068 |
| ENSG00000184697 | 206.5254896 | 511.5832861 | 2.477095138 | 1.308649279  | 7.52E-03    |
| ENSG00000171243 | 705.2663287 | 281.3202698 | 0.398885156 | -1.325954657 | 0.007527007 |
| ENSG00000144339 | 1925.734177 | 532.716184  | 0.276630176 | -1.853969555 | 0.007582588 |
| ENSG00000141668 | 257.3693712 | 94.242744   | 0.366176999 | -1.449386922 | 0.007606315 |
| ENSG00000101955 | 769.634873  | 264.097636  | 0.34314666  | -1.543102783 | 7.61E-03    |
| ENSG00000200488 | 22.98812686 | 4.613511829 | 0.200691072 | -2.316951655 | 0.007796104 |

|                 |             |             |             |              |             |
|-----------------|-------------|-------------|-------------|--------------|-------------|
| ENSG00000255874 | 8.56712684  | 1.211106438 | 0.141366699 | -2.822485787 | 0.007827825 |
| ENSG00000176463 | 1813.073685 | 737.3415818 | 0.406680428 | -1.298032535 | 0.0080328   |
| ENSG00000196569 | 2082.876106 | 206.8150457 | 0.099293014 | -3.332163977 | 0.008055591 |
| ENSG00000198682 | 658.9788671 | 290.0130084 | 0.440094551 | -1.184114587 | 0.008100103 |
| ENSG00000113396 | 7.33007992  | 1.911394156 | 0.260760343 | -1.939203616 | 8.12E-03    |
| ENSG00000225032 | 18.66503735 | 5.467917658 | 0.29294973  | -1.771274973 | 0.008205004 |
| ENSG00000230630 | 145.8486459 | 1.125397061 | 0.007716198 | -7.017894081 | 0.008235084 |
| ENSG00000176438 | 158.315201  | 38.2701315  | 0.241733777 | -2.048509022 | 0.008268044 |
| ENSG00000172830 | 34.95240626 | 15.61182555 | 0.446659536 | -1.162752532 | 0.008280957 |
| ENSG00000158764 | 7.62049056  | 15.32169394 | 2.010591552 | 1.00762003   | 0.0082911   |
| ENSG00000125347 | 344.9578352 | 140.1513945 | 0.406285581 | -1.299433931 | 0.008426699 |
| ENSG00000136237 | 1955.410636 | 836.0957359 | 0.427580642 | -1.225731555 | 0.008444458 |
| ENSG00000169594 | 26.57503421 | 5.483452871 | 0.206338507 | -2.276915015 | 0.008617781 |
| ENSG00000182511 | 41.0590133  | 18.05834165 | 0.439814311 | -1.185033546 | 0.008709801 |
| ENSG00000130208 | 53.67901136 | 106.5592605 | 1.985119654 | 0.989225969  | 0.008824707 |
| ENSG00000229645 | 74.39713471 | 11.47341315 | 0.154218482 | -2.696952426 | 0.008848903 |
| ENSG00000198821 | 6.012972241 | 22.57808624 | 3.754896137 | 1.908773002  | 0.008864452 |
| ENSG00000229915 | 2.934545194 | 0.304280796 | 0.103689252 | -3.269661735 | 0.008983429 |
| ENSG00000104213 | 83.32101569 | 35.78676021 | 0.429504608 | -1.219254484 | 0.008996931 |
| ENSG00000214711 | 4.627259419 | 0.816763023 | 0.176511181 | -2.502168524 | 0.009148657 |
| ENSG00000160219 | 28.27156787 | 8.579543164 | 0.303468955 | -1.720379158 | 0.009154384 |
| ENSG00000161905 | 1.950548459 | 0.148620104 | 0.076194008 | -3.714178651 | 0.009212355 |
| ENSG00000148600 | 188.0281355 | 623.500992  | 3.315998375 | 1.7294433    | 9.23E-03    |
| ENSG00000147256 | 0.61068858  | 4.818440874 | 7.890176809 | 2.98005763   | 0.009247418 |
| ENSG00000174473 | 63.13204081 | 23.66752113 | 0.374889214 | -1.415463779 | 0.009276847 |
| ENSG00000158089 | 13.19246527 | 32.71515808 | 2.47983659  | 1.310245057  | 0.009326442 |
| ENSG00000166265 | 779.2745975 | 1767.489165 | 2.26812111  | 1.181497678  | 0.009385259 |
| ENSG00000073756 | 46.57795415 | 5.115699234 | 0.109830913 | -3.186643922 | 0.009425607 |
| ENSG00000250608 | 8.960605584 | 2.165168516 | 0.241631941 | -2.049116922 | 0.009434367 |
| ENSG00000180269 | 2.494011188 | 0           | 0           | -Inf         | 0.009436735 |
| ENSG00000242574 | 1.067514595 | 5.161591568 | 4.835148477 | 2.273560192  | 0.009445925 |
| ENSG00000261189 | 6.937840435 | 2.489474457 | 0.358825557 | -1.478645447 | 0.00949958  |
| ENSG00000109854 | 42.78935728 | 100.4899805 | 2.348480717 | 1.231727748  | 0.009523587 |
| ENSG00000116819 | 70.54917017 | 25.41912811 | 0.360303715 | -1.472714567 | 0.009531035 |
| ENSG00000006747 | 10.18995019 | 1.63214479  | 0.160172009 | -2.642306047 | 0.009536892 |
| ENSG00000145819 | 2298.418803 | 1182.438741 | 0.514457478 | -0.958876257 | 0.009630613 |
| ENSG00000205086 | 13.27302792 | 1.556606923 | 0.117275947 | -3.092020941 | 0.009732241 |
| ENSG00000163909 | 345.4394836 | 73.33316977 | 0.212289484 | -2.235895186 | 0.009800261 |
| ENSG00000158286 | 115.4282729 | 50.94640327 | 0.441368497 | -1.179944436 | 0.009834914 |
| ENSG00000162804 | 189.4912919 | 85.05801065 | 0.448875565 | -1.155612532 | 0.009879668 |
| ENSG00000164099 | 377.0425496 | 142.3233931 | 0.377473029 | -1.40555453  | 0.009915971 |
| ENSG00000139194 | 18.68146207 | 6.981859725 | 0.373731975 | -1.419924093 | 0.009961814 |
| ENSG00000228495 | 23.59217719 | 5.935837417 | 0.251601934 | -1.990785081 | 0.009971667 |

|                 |             |             |             |              |             |
|-----------------|-------------|-------------|-------------|--------------|-------------|
| ENSG00000124225 | 944.2177366 | 431.8827462 | 0.457397409 | -1.128479901 | 0.009996687 |
| ENSG00000124313 | 190.8064344 | 79.85822385 | 0.418530036 | -1.256596933 | 0.010057882 |
| ENSG00000011677 | 8.444653584 | 24.39567318 | 2.88888975  | 1.530515147  | 0.010060839 |
| ENSG00000166816 | 12.52717961 | 3.709212211 | 0.296093161 | -1.755876926 | 0.010073731 |
| ENSG00000160255 | 18.35306065 | 4.817469953 | 0.262488641 | -1.929673101 | 0.010320814 |
| ENSG00000172497 | 1.030306373 | 5.319829674 | 5.163347342 | 2.368306652  | 1.04E-02    |
| ENSG00000248905 | 865.952572  | 176.623005  | 0.203963832 | -2.293614746 | 1.04E-02    |
| ENSG00000168062 | 21.82444776 | 5.353108246 | 0.245280353 | -2.027496417 | 0.010376107 |
| ENSG00000226674 | 7.826963111 | 0.500435353 | 0.063937359 | -3.96719703  | 0.010510968 |
| ENSG00000185761 | 9.122227866 | 32.64285779 | 3.578386582 | 1.839309254  | 0.010530078 |
| ENSG00000176428 | 282.8060798 | 118.3596269 | 0.418518679 | -1.256636082 | 0.010578066 |
| ENSG00000137474 | 30.09173125 | 12.63074315 | 0.419741325 | -1.252427586 | 0.010608209 |
| ENSG00000174607 | 132.9228053 | 276.0557718 | 2.076812712 | 1.054371119  | 0.010676606 |
| ENSG00000198221 | 353.1791501 | 151.1122448 | 0.42786287  | -1.224779608 | 0.010854793 |
| ENSG00000126860 | 7.440155625 | 1.738680303 | 0.233688701 | -2.097340114 | 0.010928678 |
| ENSG00000241544 | 0.170154574 | 2.202531458 | 12.94429767 | 3.694244784  | 1.09E-02    |
| ENSG00000261064 | 6.65460326  | 0.912842389 | 0.137174577 | -2.865914964 | 0.011015762 |
| ENSG00000173040 | 108.6939169 | 13.4594455  | 0.123828876 | -3.013580321 | 0.011062084 |
| ENSG00000240184 | 1679.907131 | 202.020487  | 0.120256938 | -3.05580797  | 0.011083628 |
| ENSG00000106078 | 72.61657924 | 26.94563553 | 0.371067266 | -1.430247356 | 0.011096928 |
| ENSG00000164100 | 145.0779447 | 45.93998298 | 0.31665725  | -1.659005985 | 0.011148159 |
| ENSG00000134330 | 240.2916621 | 52.97789876 | 0.220473313 | -2.18132406  | 0.011158258 |
| ENSG00000185532 | 404.7256304 | 194.7638961 | 0.481224517 | -1.055217949 | 0.011194131 |
| ENSG00000124772 | 58.0520157  | 24.13345541 | 0.415721231 | -1.266311667 | 0.011222072 |
| ENSG00000111331 | 35.23970725 | 2.737726177 | 0.077688675 | -3.686151877 | 0.011223029 |
| ENSG00000151025 | 80.20338254 | 230.7221242 | 2.876713136 | 1.524421364  | 0.011233633 |
| ENSG00000188921 | 40.82070111 | 17.68311894 | 0.433189986 | -1.206928203 | 0.011240575 |
| ENSG00000265293 | 2.253242009 | 0.297240208 | 0.131916681 | -2.922301084 | 0.011338029 |
| ENSG00000186340 | 1725.03034  | 691.9764466 | 0.401138711 | -1.317826899 | 0.011353293 |
| ENSG00000143387 | 246.1253655 | 98.50983187 | 0.400242501 | -1.321053722 | 0.011367086 |
| ENSG00000185862 | 1.682414294 | 0.155660692 | 0.092522212 | -3.434056429 | 0.011389548 |
| ENSG00000170891 | 31.87115862 | 3.996649317 | 0.125400189 | -2.995388572 | 0.011495112 |
| ENSG00000042062 | 94.89187781 | 25.64659324 | 0.270271743 | -1.887517408 | 0.011523416 |
| ENSG00000182601 | 145.0356029 | 57.76520788 | 0.398282951 | -1.328134372 | 0.01158359  |
| ENSG00000250107 | 5.400453383 | 1.161537684 | 0.215081513 | -2.21704457  | 0.0115964   |
| ENSG00000163536 | 176.3806115 | 89.15895622 | 0.505491819 | -0.98424035  | 1.16E-02    |
| ENSG00000180660 | 46.90828636 | 5.841865133 | 0.124538021 | -3.00534184  | 0.011627885 |
| ENSG00000111452 | 11.78462409 | 2.019520396 | 0.171369098 | -2.544821118 | 0.011631203 |
| ENSG00000174600 | 622.6398151 | 6.9733651   | 0.011199677 | -6.480399006 | 1.16E-02    |
| ENSG00000213071 | 12.27065869 | 4.055440907 | 0.330499039 | -1.597282017 | 0.011666057 |
| ENSG00000164093 | 64.01873664 | 0           | 0           | -Inf         | 0.011758882 |
| ENSG00000108439 | 69.44636396 | 14.68710748 | 0.211488502 | -2.241348864 | 0.011830226 |
| ENSG00000255248 | 2174.102739 | 703.4260715 | 0.32354776  | -1.627949405 | 0.011857089 |

|                 |             |             |             |              |             |
|-----------------|-------------|-------------|-------------|--------------|-------------|
| ENSG00000130226 | 403.6326312 | 54.80112854 | 0.135769817 | -2.880765304 | 0.011884545 |
| ENSG00000164398 | 43.93257334 | 17.38657992 | 0.39575601  | -1.337316837 | 0.011911354 |
| ENSG00000132359 | 250.6212254 | 110.2278604 | 0.439818536 | -1.185019689 | 0.012014339 |
| ENSG00000248479 | 6.331214078 | 0.859291189 | 0.135722972 | -2.881263171 | 0.012064517 |
| ENSG00000187513 | 132.1992047 | 3.069022173 | 0.023215133 | -5.428790618 | 0.012119122 |
| ENSG00000179564 | 3.42674725  | 0.476994649 | 0.1391975   | -2.844794798 | 0.012136784 |
| ENSG00000164078 | 13.28943379 | 4.409290458 | 0.331789189 | -1.591661217 | 1.22E-02    |
| ENSG00000261292 | 10.17804979 | 2.786999302 | 0.273824491 | -1.868676608 | 0.012188051 |
| ENSG00000250519 | 0.20356286  | 2.666256914 | 13.09795369 | 3.71126953   | 0.01222091  |
| ENSG00000147606 | 31.177426   | 0.311321385 | 0.009985474 | -6.645953336 | 0.012251342 |
| ENSG00000254768 | 8.662992934 | 2.232728113 | 0.257731725 | -1.956057961 | 0.012304353 |
| ENSG00000166510 | 4.476820641 | 0.642667914 | 0.143554537 | -2.800329169 | 0.012464468 |
| ENSG00000155761 | 118.6034159 | 29.5520449  | 0.249166895 | -2.004815693 | 0.012504314 |
| ENSG00000172819 | 412.5812513 | 167.1848706 | 0.405216839 | -1.303233967 | 1.25E-02    |
| ENSG00000142303 | 753.1430949 | 338.9599161 | 0.450060445 | -1.151809322 | 0.012544734 |
| ENSG00000148386 | 3.428716908 | 0.155660692 | 0.045399109 | -4.461192209 | 0.012660724 |
| ENSG00000204860 | 27.85622034 | 11.32384437 | 0.406510439 | -1.298635693 | 0.012687404 |
| ENSG00000143318 | 31.0819193  | 9.992869052 | 0.321501029 | -1.637104738 | 0.012694039 |
| ENSG00000256746 | 7.638135687 | 1.95188802  | 0.255545083 | -1.968350261 | 0.012738368 |
| ENSG00000255622 | 20.13606643 | 4.813931082 | 0.239070083 | -2.064494489 | 0.012752482 |
| ENSG00000168032 | 6.49849733  | 1.406890199 | 0.216494695 | -2.20759642  | 0.012833451 |
| ENSG00000261126 | 52.92531177 | 16.48320316 | 0.311442722 | -1.682961236 | 0.012850786 |
| ENSG00000077092 | 684.21114   | 170.092119  | 0.248595951 | -2.008125296 | 0.01285869  |
| ENSG00000254343 | 5.921356417 | 26.37885448 | 4.454866862 | 2.155382316  | 0.012874484 |
| ENSG00000240720 | 9.917593487 | 2.474826394 | 0.249539003 | -2.002662767 | 0.012879396 |
| ENSG00000163145 | 10.22130256 | 1.089624846 | 0.106603326 | -3.229675648 | 0.012900584 |
| ENSG00000108821 | 36841.33148 | 7519.687707 | 0.204110096 | -2.292580549 | 0.012900929 |
| ENSG00000144331 | 208.2370091 | 44.91179988 | 0.215676359 | -2.21306005  | 0.012917285 |
| ENSG00000257467 | 10.17466229 | 2.970169302 | 0.29191822  | -1.776363837 | 0.01296975  |
| ENSG00000187957 | 1147.928157 | 556.3043246 | 0.484615976 | -1.045086128 | 0.01305868  |
| ENSG00000169908 | 22.16913947 | 5.13115928  | 0.23145505  | -2.111196056 | 0.013077996 |
| ENSG00000253537 | 132.9898616 | 5.932814901 | 0.044611031 | -4.486455685 | 0.013100164 |
| ENSG00000051523 | 199.2094629 | 80.18493492 | 0.402515693 | -1.312883065 | 0.013118947 |
| ENSG00000182759 | 0.359255703 | 5.267041453 | 14.66098215 | 3.873909848  | 1.32E-02    |
| ENSG00000073282 | 7.958345279 | 0.79332232  | 0.09968433  | -3.326489448 | 0.013274208 |
| ENSG00000008323 | 71.30754158 | 147.4969722 | 2.06846245  | 1.048558768  | 0.013275807 |
| ENSG00000135917 | 5.663693444 | 1.971260119 | 0.348052051 | -1.522625019 | 0.013342575 |
| ENSG00000100628 | 9.110262739 | 2.115526982 | 0.232213608 | -2.106475575 | 0.013515437 |
| ENSG00000228868 | 17.23326861 | 74.47134021 | 4.321370595 | 2.11148896   | 0.013538127 |
| ENSG00000153898 | 9.068797886 | 3.779322464 | 0.416739077 | -1.262783708 | 0.013661297 |
| ENSG00000188580 | 74.57870841 | 37.38553848 | 0.501289702 | -0.996283499 | 0.013683263 |
| ENSG00000248663 | 1.769730187 | 0           | 0           | -Inf         | 0.013692494 |
| ENSG00000137965 | 102.4503067 | 3.210158115 | 0.031333807 | -4.996136135 | 0.013723838 |

|                 |             |             |             |              |             |
|-----------------|-------------|-------------|-------------|--------------|-------------|
| ENSG00000203279 | 1.593532314 | 4.421535811 | 2.774675966 | 1.472319299  | 1.38E-02    |
| ENSG00000250682 | 3.50422752  | 0.786281732 | 0.224380902 | -2.155978207 | 0.013873911 |
| ENSG00000169181 | 3.42633797  | 0.771262873 | 0.225098306 | -2.151372894 | 0.013988767 |
| ENSG00000106823 | 43.57276024 | 3.419740802 | 0.078483456 | -3.671467622 | 0.014029028 |
| ENSG00000050327 | 10.10972721 | 3.319383361 | 0.328335601 | -1.606756907 | 0.014062338 |
| ENSG00000167157 | 15.37323544 | 5.643396411 | 0.367092304 | -1.445785228 | 0.014063782 |
| ENSG00000205111 | 8.884776407 | 2.229756129 | 0.250963674 | -1.994449541 | 1.41E-02    |
| ENSG00000178222 | 2.255894653 | 0.155660692 | 0.069001756 | -3.857223113 | 0.014142732 |
| ENSG00000228613 | 1.28132997  | 0           | 0           | -Inf         | 0.014160443 |
| ENSG00000205221 | 6.479039053 | 0.321333957 | 0.049595928 | -4.333634503 | 0.014161808 |
| ENSG00000172348 | 231.8018562 | 495.2651423 | 2.136588336 | 1.095308966  | 0.014183604 |
| ENSG00000228656 | 4.713789884 | 0.316327671 | 0.067106867 | -3.897395786 | 0.014271159 |
| ENSG00000233165 | 1.933847171 | 0.160666978 | 0.083081528 | -3.589328435 | 0.01427577  |
| ENSG00000106789 | 69.74545943 | 162.9028343 | 2.335676554 | 1.223840503  | 0.014305153 |
| ENSG00000215302 | 31.52688304 | 13.03937721 | 0.413595508 | -1.273707578 | 0.01443291  |
| ENSG00000146166 | 28.46787859 | 2.958331898 | 0.103918242 | -3.266479164 | 0.014487951 |
| ENSG00000173093 | 3.138789136 | 12.92754515 | 4.118640849 | 2.042168327  | 0.014517637 |
| ENSG00000254352 | 13.49413222 | 5.131564843 | 0.380281204 | -1.394861463 | 0.01462174  |
| ENSG00000229989 | 6.637433858 | 1.712552252 | 0.25801421  | -1.954477572 | 0.014715313 |
| ENSG00000197822 | 94.17150013 | 195.4562392 | 2.075534944 | 1.053483221  | 0.014747097 |
| ENSG00000074416 | 189.2644456 | 30.82243848 | 0.162853823 | -2.618350509 | 0.014777792 |
| ENSG00000204175 | 38.98437537 | 70.74715798 | 1.814756741 | 0.859776175  | 0.014937614 |
| ENSG00000159871 | 2.075948064 | 0.160666978 | 0.077394508 | -3.691625001 | 0.014961127 |
| ENSG00000188000 | 24.74827952 | 1.126050106 | 0.045500137 | -4.457985304 | 0.015014445 |
| ENSG00000269793 | 66.59814352 | 6.849070462 | 0.102841763 | -3.281501854 | 0.015033948 |
| ENSG00000264462 | 3.977256731 | 0.542963519 | 0.136517091 | -2.872846518 | 0.01510225  |
| ENSG00000078725 | 112.1298458 | 54.68966258 | 0.487735109 | -1.035830268 | 0.015161845 |
| ENSG00000117598 | 92.02056276 | 46.07367285 | 0.500688884 | -0.99801367  | 0.015185556 |
| ENSG00000231205 | 197.3510934 | 83.30231273 | 0.422102109 | -1.244336058 | 0.015276496 |
| ENSG00000129467 | 5.387140847 | 1.107615689 | 0.205603625 | -2.282062391 | 0.01534371  |
| ENSG00000011347 | 313.1557015 | 139.5308268 | 0.445563744 | -1.166296251 | 0.01543139  |
| ENSG00000100336 | 48.66883527 | 1.620541491 | 0.033297314 | -4.908450385 | 0.015494166 |
| ENSG00000254319 | 4.939420056 | 0           | 0           | -Inf         | 0.015538988 |
| ENSG00000257139 | 3.528941766 | 0.464947775 | 0.131752748 | -2.924095043 | 1.56E-02    |
| ENSG00000088543 | 225.1800296 | 488.7437828 | 2.170457939 | 1.117999465  | 0.015647546 |
| ENSG00000180176 | 54.09827136 | 3.663268486 | 0.067715075 | -3.884379148 | 0.015667652 |
| ENSG00000230712 | 1.503563777 | 0           | 0           | -Inf         | 0.015688309 |
| ENSG00000240668 | 3.976936263 | 0.946295665 | 0.237945897 | -2.071294519 | 0.015840413 |
| ENSG00000100985 | 66.26890531 | 16.4612141  | 0.248400272 | -2.009261341 | 0.01603291  |
| ENSG00000104419 | 448.1198342 | 235.0207755 | 0.524459659 | -0.931096288 | 0.016050858 |
| ENSG00000231437 | 3.877944954 | 0.622642769 | 0.160559981 | -2.638815741 | 1.61E-02    |
| ENSG00000198108 | 195.4411666 | 96.89881992 | 0.495795341 | -1.012183379 | 0.016152858 |
| ENSG00000246379 | 7.76544802  | 20.33858453 | 2.619112829 | 1.389078211  | 0.016159967 |



|                 |             |             |             |              |             |
|-----------------|-------------|-------------|-------------|--------------|-------------|
| ENSG00000229590 | 6.505961628 | 1.541429127 | 0.236925641 | -2.077493756 | 1.62E-02    |
| ENSG00000134853 | 409.8555575 | 26.25224311 | 0.064052427 | -3.964602957 | 0.016322311 |
| ENSG00000203727 | 577.8309073 | 189.3884625 | 0.327757585 | -1.609298928 | 0.016380227 |
| ENSG00000183087 | 908.6475004 | 381.8374003 | 0.420226105 | -1.250762307 | 0.016400308 |
| ENSG00000253348 | 17.24781422 | 3.305140861 | 0.19162665  | -2.38362988  | 0.016486446 |
| ENSG00000147402 | 27.65507098 | 53.0976931  | 1.919998438 | 0.941105138  | 0.01658039  |
| ENSG00000198028 | 127.3428618 | 12.53108299 | 0.098404283 | -3.345135083 | 1.67E-02    |
| ENSG00000157766 | 4.614029333 | 20.09457526 | 4.355103492 | 2.122707003  | 0.016654025 |
| ENSG00000171227 | 30.7089454  | 72.78642032 | 2.370202538 | 1.245010345  | 0.016692576 |
| ENSG00000029559 | 2.205783175 | 0           | 0           | -Inf         | 0.016693998 |
| ENSG00000066185 | 3.5706272   | 15.1205204  | 4.234695909 | 2.082258374  | 0.016717256 |
| ENSG00000164588 | 341.3680202 | 78.4964716  | 0.229946764 | -2.1206282   | 0.016762265 |
| ENSG00000196811 | 15.02566467 | 5.224389974 | 0.347697762 | -1.524094315 | 0.016867554 |
| ENSG00000267909 | 88.68126591 | 38.6584171  | 0.435925409 | -1.197846798 | 0.016956436 |
| ENSG00000100285 | 224.9542869 | 103.5333999 | 0.460241951 | -1.119535603 | 0.016996566 |
| ENSG00000254896 | 2.166196015 | 0.148620104 | 0.068608798 | -3.865462605 | 0.017068662 |
| ENSG00000122121 | 77.99450172 | 10.16854628 | 0.130375168 | -2.939258981 | 0.017150127 |
| ENSG00000129009 | 384.3811584 | 10.86145586 | 0.028256993 | -5.145248221 | 1.72E-02    |
| ENSG00000120937 | 2.129174589 | 33.05748185 | 15.5259611  | 3.956610673  | 0.017348284 |
| ENSG00000111424 | 9.220463254 | 2.740204054 | 0.297187243 | -1.750555907 | 0.017686666 |
| ENSG00000165929 | 5.102707062 | 1.597100787 | 0.312990883 | -1.675807462 | 0.01784839  |
| ENSG00000164129 | 124.9154692 | 18.51483213 | 0.14821889  | -2.754198773 | 0.017880137 |
| ENSG00000123146 | 82.56643843 | 34.72589169 | 0.420581199 | -1.249543735 | 0.018136749 |
| ENSG00000152467 | 16.67793796 | 4.117515876 | 0.24688399  | -2.018094809 | 0.018171998 |
| ENSG00000131187 | 13.41019937 | 43.41127633 | 3.237183515 | 1.694739154  | 0.018195715 |
| ENSG00000141965 | 10.88534373 | 3.642678841 | 0.334640681 | -1.579315255 | 0.018236342 |
| ENSG00000099994 | 72.89311652 | 20.83192142 | 0.285787224 | -1.806986672 | 0.018254283 |
| ENSG00000168631 | 0.10178143  | 2.926063787 | 28.7485034  | 4.845414948  | 0.018294155 |
| ENSG00000171608 | 241.3122337 | 465.0032735 | 1.926977619 | 0.946339815  | 0.018309931 |
| ENSG00000221963 | 42.12886896 | 4.421546803 | 0.104952896 | -3.252186119 | 0.018345321 |
| ENSG00000116132 | 2103.056623 | 76.69662967 | 0.036469123 | -4.777180702 | 1.84E-02    |
| ENSG00000185614 | 103.7109401 | 38.54561172 | 0.371663893 | -1.427929558 | 0.018590713 |
| ENSG00000073331 | 148.037011  | 50.48284935 | 0.341015054 | -1.552092666 | 0.0186056   |
| ENSG00000127329 | 245.9792622 | 89.07540003 | 0.362125649 | -1.465437729 | 0.018791491 |
| ENSG00000261770 | 42.96159563 | 13.10647423 | 0.305074196 | -1.712767938 | 0.018800599 |
| ENSG00000174332 | 4.847204349 | 0.500435353 | 0.103242058 | -3.27589729  | 0.018845137 |
| ENSG00000117115 | 20.23830503 | 62.03514246 | 3.065234088 | 1.615997255  | 0.018871996 |
| ENSG00000138080 | 3311.44916  | 321.2414244 | 0.097009318 | -3.365732862 | 0.018918845 |
| ENSG00000127903 | 113.3549122 | 14.19153569 | 0.125195595 | -2.997744291 | 1.91E-02    |
| ENSG00000169418 | 30.54287346 | 12.83702558 | 0.420295281 | -1.250524837 | 1.91E-02    |
| ENSG00000054356 | 136.4678568 | 355.1742683 | 2.602622161 | 1.379965882  | 0.019097228 |
| ENSG00000265095 | 6.169938436 | 17.9448431  | 2.908431467 | 1.54024131   | 0.019156305 |
| ENSG00000127528 | 21.20720499 | 3.683454955 | 0.173688846 | -2.525422988 | 0.019260814 |

|                 |             |             |             |              |             |
|-----------------|-------------|-------------|-------------|--------------|-------------|
| ENSG00000201428 | 25.20191157 | 7.115145481 | 0.282325627 | -1.824568006 | 0.019566975 |
| ENSG00000160180 | 5.970785562 | 0.155660692 | 0.026070387 | -5.261444172 | 0.019609432 |
| ENSG00000102755 | 21.5547738  | 10.4198166  | 0.483411086 | -1.048677537 | 0.01961819  |
| ENSG00000149573 | 0.322047482 | 1.993676982 | 6.190630562 | 2.630086366  | 0.019803375 |
| ENSG00000196218 | 105.1270668 | 34.82928111 | 0.331306505 | -1.593761563 | 0.019821928 |
| ENSG00000065534 | 1940.71527  | 6043.766466 | 3.114195349 | 1.638859445  | 0.019896525 |
| ENSG00000185924 | 149.1676533 | 44.27633858 | 0.296822653 | -1.752326895 | 0.019995656 |
| ENSG00000237632 | 12.85320162 | 2.518206084 | 0.195920531 | -2.351659507 | 0.020068798 |
| ENSG00000055732 | 14.27213718 | 3.029022417 | 0.212233275 | -2.236277227 | 0.02013981  |
| ENSG00000140323 | 274.2059519 | 124.902156  | 0.455504905 | -1.134461506 | 0.020197646 |
| ENSG00000170703 | 4.797089066 | 17.78036293 | 3.706490057 | 1.890053641  | 0.020272853 |
| ENSG00000102048 | 9.014337813 | 2.346145276 | 0.260268178 | -1.941929167 | 0.020586318 |
| ENSG00000213188 | 2.384220606 | 0.311321385 | 0.130575746 | -2.937041147 | 0.020612733 |
| ENSG00000224382 | 15.82898918 | 0.798328606 | 0.050434592 | -4.309442612 | 0.020714559 |
| ENSG00000227467 | 4.005991494 | 0.155660692 | 0.03885697  | -4.685682774 | 2.09E-02    |
| ENSG00000171840 | 3.513520191 | 0.321333957 | 0.091456414 | -3.450771839 | 0.020940291 |
| ENSG00000137727 | 28.58310055 | 10.82260172 | 0.37863638  | -1.40111506  | 0.020970392 |
| ENSG00000101977 | 20.04338642 | 5.109223146 | 0.25490818  | -1.971950427 | 0.021053574 |
| ENSG00000162267 | 10.83405117 | 2.309720016 | 0.213190798 | -2.229782926 | 0.021115219 |
| ENSG00000111181 | 2.195991161 | 9.78379385  | 4.455297463 | 2.155521758  | 0.021189355 |
| ENSG00000269349 | 3.433934036 | 0.297240208 | 0.086559673 | -3.530161136 | 0.021198794 |
| ENSG00000177406 | 3.482628321 | 12.4228555  | 3.567091965 | 1.834748411  | 0.021217567 |
| ENSG00000180440 | 30.70371842 | 92.87134356 | 3.024758835 | 1.596820121  | 0.021331404 |
| ENSG00000233295 | 1.493313165 | 0           | 0           | -Inf         | 2.14E-02    |
| ENSG00000116147 | 6.054393484 | 17.56963317 | 2.901964204 | 1.537029724  | 0.02142576  |
| ENSG00000247970 | 4.474626596 | 0.955370555 | 0.213508443 | -2.227634977 | 0.021436373 |
| ENSG00000130045 | 2.209581208 | 0.346808962 | 0.156956875 | -2.671559868 | 2.14E-02    |
| ENSG00000213035 | 0.128737137 | 2.423432808 | 18.82465985 | 4.234551892  | 0.021623674 |
| ENSG00000106004 | 29.22797362 | 4.202838693 | 0.143795076 | -2.797913819 | 0.021705825 |
| ENSG00000184160 | 20.52538338 | 44.76419401 | 2.180918777 | 1.124936041  | 2.18E-02    |
| ENSG00000137959 | 214.3032734 | 28.34034549 | 0.132244109 | -2.918724636 | 0.021798745 |
| ENSG00000129910 | 30.04446271 | 1.466471525 | 0.048810043 | -4.356678159 | 0.021837105 |
| ENSG00000100652 | 4.480398093 | 1.241216934 | 0.277032734 | -1.851871639 | 0.021912716 |
| ENSG00000208024 | 3.209135745 | 0           | 0           | -Inf         | 2.20E-02    |
| ENSG00000171345 | 6.430807172 | 14.35372539 | 2.232025468 | 1.158353489  | 0.022009288 |
| ENSG00000120156 | 145.907776  | 523.1992975 | 3.585821892 | 1.842303831  | 0.022025468 |
| ENSG00000172752 | 6.208030413 | 0.778303462 | 0.125370433 | -2.995730946 | 0.022032505 |
| ENSG00000257818 | 11.08158423 | 4.130484667 | 0.372734131 | -1.423781163 | 0.022136254 |
| ENSG00000188393 | 2.748098611 | 0           | 0           | -Inf         | 2.22E-02    |
| ENSG00000204540 | 4.540900216 | 0.309287083 | 0.068111403 | -3.875959849 | 0.022246786 |
| ENSG00000173546 | 645.7826797 | 292.2803724 | 0.452598655 | -1.143695797 | 0.022370578 |
| ENSG00000163631 | 13.6669063  | 3.625537136 | 0.265278554 | -1.914420049 | 0.022457395 |
| ENSG00000233670 | 20.3244343  | 1.188960833 | 0.058499086 | -4.095442102 | 0.022500271 |

|                 |             |             |             |              |             |
|-----------------|-------------|-------------|-------------|--------------|-------------|
| ENSG00000146147 | 107.166139  | 5.331986482 | 0.049754396 | -4.3290322   | 0.02250744  |
| ENSG00000233672 | 1.577978318 | 8.50717576  | 5.391186726 | 2.430602879  | 0.022527451 |
| ENSG00000181790 | 165.4871375 | 82.07052221 | 0.495932937 | -1.01178305  | 0.022653722 |
| ENSG00000248050 | 1.682414294 | 0.311321385 | 0.185044424 | -2.434056429 | 0.022721668 |
| ENSG00000198774 | 6.303996084 | 0.339768374 | 0.053897301 | -4.213643161 | 0.022729162 |
| ENSG00000224729 | 8.8505432   | 2.181495852 | 0.246481578 | -2.020448273 | 0.022790648 |
| ENSG00000138639 | 378.585628  | 149.0228652 | 0.39363054  | -1.345085938 | 0.022806667 |
| ENSG00000008394 | 2213.424086 | 4357.66316  | 1.968742993 | 0.977274789  | 0.022901285 |
| ENSG00000172137 | 99.36737782 | 9.38191574  | 0.094416457 | -3.404817846 | 0.022933658 |
| ENSG00000243955 | 4.639015382 | 0.160666978 | 0.034633853 | -4.851673279 | 0.02293658  |
| ENSG00000213640 | 5.485577134 | 1.23714833  | 0.22552747  | -2.148624928 | 2.30E-02    |
| ENSG00000010610 | 373.7398373 | 135.5110658 | 0.362581273 | -1.463623683 | 0.022996541 |
| ENSG00000206702 | 1.766803838 | 0           | 0           | -Inf         | 0.023066993 |
| ENSG00000229048 | 3.099339454 | 0.311321385 | 0.100447656 | -3.31548419  | 0.023116098 |
| ENSG00000145247 | 42.00797396 | 152.6860566 | 3.634692232 | 1.861833209  | 0.023133938 |
| ENSG00000168490 | 40.66075968 | 81.70716277 | 2.009484412 | 1.006825386  | 0.023203568 |
| ENSG00000259715 | 186.9167956 | 86.11889474 | 0.460733849 | -1.117994501 | 0.023308014 |
| ENSG00000120498 | 2.005882773 | 0.148620104 | 0.074092118 | -3.754536105 | 0.023373356 |
| ENSG00000151062 | 16.32447659 | 3.451885601 | 0.211454596 | -2.241580177 | 0.023390928 |
| ENSG00000187773 | 3.88302841  | 0.346808962 | 0.089314042 | -3.484969176 | 0.023391698 |
| ENSG00000213014 | 1.44699972  | 0           | 0           | -Inf         | 0.023403079 |
| ENSG00000235310 | 8.324295385 | 1.305804547 | 0.156866676 | -2.672389189 | 0.023502652 |
| ENSG00000160862 | 1.119595731 | 0           | 0           | -Inf         | 0.023771278 |
| ENSG00000133055 | 28.95759418 | 0.849278617 | 0.029328356 | -5.09156001  | 0.023835064 |
| ENSG00000231307 | 4.564598938 | 0.816763023 | 0.178934236 | -2.482498646 | 0.023887087 |
| ENSG00000136542 | 19.34602132 | 4.52679199  | 0.233990851 | -2.095475974 | 0.023890405 |
| ENSG00000184058 | 7.55388362  | 1.13011871  | 0.149607641 | -2.740744232 | 0.023895725 |
| ENSG00000182578 | 8.490053948 | 2.737887501 | 0.322481756 | -1.632710553 | 0.024005405 |
| ENSG00000142748 | 9.037631061 | 1.881197501 | 0.208151615 | -2.264293343 | 0.024087771 |
| ENSG00000226686 | 112.3287003 | 25.36651937 | 0.225824026 | -2.146729107 | 2.42E-02    |
| ENSG00000259006 | 0.502454571 | 4.584038613 | 9.123289702 | 3.189554129  | 0.024286383 |
| ENSG00000261728 | 2.102218883 | 0.155660692 | 0.074045901 | -3.755436306 | 2.44E-02    |
| ENSG00000155897 | 19.94425542 | 76.29673637 | 3.825499361 | 1.935648082  | 0.024470612 |
| ENSG00000242086 | 975.5466444 | 496.6866172 | 0.509136718 | -0.97387498  | 0.024539891 |
| ENSG00000163453 | 74.87233141 | 2.427219162 | 0.032418106 | -4.947056393 | 0.024574291 |
| ENSG00000091136 | 12610.66883 | 6511.174051 | 0.516322658 | -0.953655184 | 0.024614662 |
| ENSG00000121310 | 89.35931995 | 29.49756615 | 0.330100611 | -1.599022284 | 0.024623506 |
| ENSG00000170624 | 175.088625  | 18.28854483 | 0.104453072 | -3.259073166 | 0.024687592 |
| ENSG00000256720 | 1.763281414 | 0.155660692 | 0.088278984 | -3.501786158 | 0.024761403 |
| ENSG00000241213 | 1.044358824 | 0           | 0           | -Inf         | 2.48E-02    |
| ENSG00000224677 | 143.3984777 | 70.09674767 | 0.488824908 | -1.032610296 | 0.024827977 |
| ENSG00000214872 | 84.60891077 | 35.96240796 | 0.425042795 | -1.234319988 | 0.024863884 |
| ENSG00000269483 | 8.19606205  | 2.597885334 | 0.316967504 | -1.657593152 | 0.025108742 |

|                 |             |             |             |              |             |
|-----------------|-------------|-------------|-------------|--------------|-------------|
| ENSG00000138650 | 935.6210921 | 273.2296737 | 0.292030263 | -1.775810211 | 0.02514284  |
| ENSG00000162542 | 9.197720569 | 4.271991403 | 0.464461969 | -1.106367625 | 0.025501348 |
| ENSG00000205683 | 356.5821722 | 136.7460447 | 0.383490975 | -1.382735471 | 0.02551763  |
| ENSG00000099984 | 9.534046139 | 2.917480618 | 0.306006555 | -1.708365536 | 0.025571056 |
| ENSG00000237732 | 149.133593  | 26.62042258 | 0.178500511 | -2.48599989  | 0.025639784 |
| ENSG00000158769 | 1394.399996 | 2390.068651 | 1.714048091 | 0.777407587  | 0.02571782  |
| ENSG00000254535 | 123.2815049 | 39.09152107 | 0.317091531 | -1.657028751 | 2.57E-02    |
| ENSG00000082497 | 723.8723567 | 309.1571774 | 0.427087973 | -1.227394824 | 0.025740228 |
| ENSG00000139330 | 11.555586   | 0           | 0           | -Inf         | 0.025895889 |
| ENSG00000169122 | 1062.829293 | 480.9384984 | 0.452507756 | -1.143985574 | 0.025904113 |
| ENSG00000196116 | 144.9166283 | 81.14462237 | 0.559940038 | -0.836655752 | 0.025957951 |
| ENSG00000144645 | 160.4359786 | 92.21887581 | 0.574801716 | -0.798863726 | 2.60E-02    |
| ENSG00000188452 | 268.8976161 | 68.98036217 | 0.256530211 | -1.962799356 | 0.026132959 |
| ENSG00000186088 | 19.10580907 | 6.299278213 | 0.329704866 | -1.600752917 | 0.026133983 |
| ENSG00000064763 | 260.6935818 | 126.9776168 | 0.487076114 | -1.037780859 | 2.62E-02    |
| ENSG00000184674 | 507.4560674 | 1185.968776 | 2.337086602 | 1.224711195  | 0.026260731 |
| ENSG00000100033 | 142.9328626 | 40.13955696 | 0.280828049 | -1.832241056 | 0.026282019 |
| ENSG00000253830 | 20.01614909 | 3.240924043 | 0.161915463 | -2.626687326 | 0.026517003 |
| ENSG00000233523 | 3.530087155 | 0.311321385 | 0.088190849 | -3.503227219 | 0.026561555 |
| ENSG00000248909 | 1.603377452 | 0           | 0           | -Inf         | 0.02656924  |
| ENSG00000069399 | 188.7152149 | 89.0123064  | 0.471675304 | -1.084134028 | 0.026606085 |
| ENSG00000177839 | 108.6626163 | 53.6011398  | 0.493280409 | -1.019520104 | 0.026751841 |
| ENSG00000230552 | 2.876835748 | 0.155660692 | 0.0541083   | -4.208006269 | 0.026948018 |
| ENSG00000248596 | 23.71932983 | 7.540779784 | 0.317917068 | -1.653277625 | 0.026959037 |
| ENSG00000186867 | 8.524613985 | 2.477798378 | 0.290663997 | -1.782575709 | 2.70E-02    |
| ENSG00000188522 | 66.8804076  | 145.5788738 | 2.176704345 | 1.122145464  | 0.027045637 |
| ENSG00000260799 | 1.674401336 | 5.723209966 | 3.418063425 | 1.773179167  | 2.72E-02    |
| ENSG00000106638 | 1715.973697 | 833.8821712 | 0.48595277  | -1.04111199  | 0.02719998  |
| ENSG00000077009 | 15.02373291 | 31.03735443 | 2.065888326 | 1.04676227   | 0.02722263  |
| ENSG00000249239 | 0.271936004 | 2.54238599  | 9.349206985 | 3.224843998  | 0.027227521 |
| ENSG00000115414 | 58926.67374 | 16123.43095 | 0.273618549 | -1.869762061 | 0.02725803  |
| ENSG00000196542 | 8.000232733 | 29.08881441 | 3.635996024 | 1.862350622  | 0.027266013 |
| ENSG00000176399 | 21.60570069 | 55.08806846 | 2.549700621 | 1.35032786   | 2.75E-02    |
| ENSG00000120658 | 447.4263088 | 209.2730836 | 0.467726371 | -1.096263324 | 0.027489303 |
| ENSG00000149571 | 72.55873192 | 132.4425101 | 1.825314564 | 0.868145111  | 0.027544161 |
| ENSG00000102383 | 170.3738698 | 368.9291685 | 2.165409337 | 1.11463977   | 0.027860732 |
| ENSG00000018625 | 2512.360113 | 853.5135943 | 0.339725818 | -1.557557233 | 0.02790665  |
| ENSG00000008196 | 6101.089774 | 720.5790466 | 0.118106613 | -3.081838353 | 0.027925708 |
| ENSG00000158815 | 29.16814402 | 9.696440827 | 0.332432561 | -1.588866396 | 0.027937515 |
| ENSG00000264840 | 1.100237993 | 9.74477627  | 8.856971251 | 3.146813436  | 0.028045028 |
| ENSG00000267034 | 148.9528844 | 40.86846849 | 0.274371783 | -1.865795975 | 0.028094489 |
| ENSG00000123609 | 18.60714492 | 3.069516281 | 0.164964388 | -2.599773478 | 0.028096037 |
| ENSG00000021300 | 309.298145  | 863.4464738 | 2.791631595 | 1.481108565  | 0.028339834 |

|                 |             |             |             |              |             |
|-----------------|-------------|-------------|-------------|--------------|-------------|
| ENSG00000112852 | 1777.463477 | 855.7463294 | 0.481442427 | -1.054564812 | 0.02840508  |
| ENSG00000259520 | 14.21361139 | 2.759648933 | 0.194155367 | -2.364716509 | 2.84E-02    |
| ENSG00000212916 | 30.90423112 | 10.79127521 | 0.349184394 | -1.517939013 | 0.028511351 |
| ENSG00000173210 | 12.91066859 | 4.200005786 | 0.325312803 | -1.620100493 | 0.028512821 |
| ENSG00000241622 | 5.301315082 | 0.828809898 | 0.156340433 | -2.677237152 | 0.028518488 |
| ENSG00000228065 | 126.6793721 | 44.16052494 | 0.348600756 | -1.520352395 | 0.028572927 |
| ENSG00000157388 | 49.76606789 | 23.68275423 | 0.475881564 | -1.07132553  | 0.028592225 |
| ENSG00000112796 | 8.753918161 | 16.37001745 | 1.87002176  | 0.903055058  | 0.028625381 |
| ENSG00000183317 | 2.522932747 | 6.307415421 | 2.500033118 | 1.321947206  | 0.028671665 |
| ENSG00000186676 | 46.20415394 | 103.9173149 | 2.24909031  | 1.169341592  | 0.028722791 |
| ENSG00000251229 | 9.553308105 | 3.339690756 | 0.349584743 | -1.516285874 | 0.028809476 |
| ENSG00000261303 | 5.749007797 | 0           | 0           | -Inf         | 0.028874044 |
| ENSG00000261925 | 0.91603287  | 0           | 0           | -Inf         | 0.028888972 |
| ENSG00000214533 | 1.86927206  | 0.304280796 | 0.162780369 | -2.619001367 | 0.028973458 |
| ENSG00000230310 | 3.309819201 | 0.309287083 | 0.09344531  | -3.419733926 | 0.029047628 |
| ENSG00000267586 | 33.78869465 | 6.781279148 | 0.200696689 | -2.316911278 | 0.029124154 |
| ENSG00000185215 | 220.9905008 | 115.6167532 | 0.523175217 | -0.934633893 | 0.029277365 |
| ENSG00000154485 | 3.503131449 | 0.651089759 | 0.185859357 | -2.427716772 | 0.029408091 |
| ENSG00000180318 | 9.611163294 | 74.92738389 | 7.795870447 | 2.962710116  | 2.95E-02    |
| ENSG00000227195 | 103.0807467 | 39.72131589 | 0.385341755 | -1.375789571 | 0.029535827 |
| ENSG00000261211 | 3.528941766 | 0.979464304 | 0.277551847 | -1.849170803 | 0.029634223 |
| ENSG00000135111 | 42.19142345 | 1.598409264 | 0.037884696 | -4.722241007 | 0.02969303  |
| ENSG00000200087 | 33.61446166 | 16.62027757 | 0.494438309 | -1.016137569 | 0.029697038 |
| ENSG00000215018 | 8.261450012 | 3.108048622 | 0.376211031 | -1.410385946 | 0.029727209 |
| ENSG00000229404 | 12.81700892 | 0           | 0           | -Inf         | 0.029749623 |
| ENSG00000143333 | 240.1887092 | 40.28357048 | 0.167716337 | -2.575904869 | 0.029921058 |
| ENSG00000258670 | 0           | 1.606831109 | Inf         | Inf          | 0.029970997 |
| ENSG00000188730 | 95.6822872  | 28.46397489 | 0.297484265 | -1.749114733 | 0.029989908 |
| ENSG00000241484 | 11.97169292 | 4.491868913 | 0.375207495 | -1.414239447 | 0.030230607 |
| ENSG00000142959 | 4.127593066 | 1.102609403 | 0.267131325 | -1.904378935 | 0.030244187 |
| ENSG00000134463 | 5.893747704 | 1.567557178 | 0.265969508 | -1.910667237 | 0.030260976 |
| ENSG00000254133 | 8.186590503 | 2.35021388  | 0.287080913 | -1.800470678 | 0.030345286 |
| ENSG00000071462 | 2502.432339 | 1298.684615 | 0.518968923 | -0.946279946 | 0.030362836 |
| ENSG00000112379 | 87.13414732 | 51.84933254 | 0.595051815 | -0.748912795 | 0.030456091 |
| ENSG00000176293 | 35.0495467  | 17.92770438 | 0.511496041 | -0.967205021 | 0.030485426 |
| ENSG00000154153 | 76.30017494 | 42.81686623 | 0.561163408 | -0.833507156 | 0.030526783 |
| ENSG00000225889 | 79.62040512 | 42.64291702 | 0.535577745 | -0.900832082 | 0.030622207 |
| ENSG00000228601 | 9.288613914 | 0.321333957 | 0.034594393 | -4.853317977 | 0.030768534 |
| ENSG00000179909 | 684.767858  | 267.8884902 | 0.391210667 | -1.353982388 | 0.030806319 |
| ENSG00000128849 | 2050.36313  | 964.3579167 | 0.470335182 | -1.088238841 | 0.031040523 |
| ENSG00000171954 | 0.220266052 | 1.908422172 | 8.664168437 | 3.11506129   | 0.031096961 |
| ENSG00000119714 | 32.96860175 | 15.40051996 | 0.467126877 | -1.098113641 | 0.031144091 |
| ENSG00000249678 | 1.339861782 | 0           | 0           | -Inf         | 0.03137314  |

|                 |             |             |             |              |             |
|-----------------|-------------|-------------|-------------|--------------|-------------|
| ENSG00000203472 | 6.425865652 | 18.65046836 | 2.902405585 | 1.537249137  | 3.15E-02    |
| ENSG00000249395 | 65.34924047 | 23.14733964 | 0.354209773 | -1.497324076 | 0.031489227 |
| ENSG00000137225 | 5.676181711 | 20.41352593 | 3.596348208 | 1.846532713  | 0.031557831 |
| ENSG00000162620 | 5.556793523 | 18.6362648  | 3.353780328 | 1.745788196  | 0.031577496 |
| ENSG00000112319 | 507.9283713 | 39.6100531  | 0.077983541 | -3.68068652  | 0.0315919   |
| ENSG00000196549 | 335.3452333 | 115.7071306 | 0.345038841 | -1.53516932  | 0.031611294 |
| ENSG00000137393 | 42.45964455 | 133.8935635 | 3.153431097 | 1.656922411  | 3.18E-02    |
| ENSG00000229108 | 3.158337476 | 0.155660692 | 0.049285643 | -4.342688751 | 0.031770817 |
| ENSG00000165617 | 962.3293262 | 417.9290848 | 0.434289046 | -1.203272531 | 0.031792076 |
| ENSG00000251868 | 1.769047202 | 0.148620104 | 0.084011384 | -3.573271352 | 3.18E-02    |
| ENSG00000160867 | 276.1923135 | 166.5197179 | 0.602912209 | -0.72998015  | 0.031908931 |
| ENSG00000142233 | 18.97484869 | 4.793091567 | 0.25260236  | -1.985059975 | 0.031956764 |
| ENSG00000236166 | 15.40237443 | 5.137299341 | 0.33353944  | -1.58407073  | 0.032045616 |
| ENSG00000251002 | 50.57436662 | 12.60901496 | 0.24931632  | -2.003950773 | 3.21E-02    |
| ENSG00000144671 | 2.263492621 | 0.309287083 | 0.136641525 | -2.871532118 | 0.032138693 |
| ENSG00000213958 | 3.691087188 | 0.910808087 | 0.246758757 | -2.01882681  | 0.032205016 |
| ENSG00000196139 | 17.28814813 | 8.352165726 | 0.483115118 | -1.049561095 | 0.032260738 |
| ENSG00000163219 | 8.57545646  | 1.717273902 | 0.200254518 | -2.320093301 | 0.032311645 |
| ENSG00000175701 | 191.7145157 | 84.39911998 | 0.440233332 | -1.183659714 | 0.032320324 |
| ENSG00000170909 | 4.646565935 | 14.11610843 | 3.037965808 | 1.603105632  | 0.032511127 |
| ENSG00000169508 | 13.27122192 | 3.329393547 | 0.250873173 | -1.994969892 | 0.032529981 |
| ENSG00000138135 | 32.01171817 | 0.803334892 | 0.025095026 | -5.316454762 | 0.032541313 |
| ENSG00000268705 | 4.588034123 | 0.958342539 | 0.208878686 | -2.259262807 | 0.032566712 |
| ENSG00000121871 | 192.7213028 | 88.12968869 | 0.457290852 | -1.128816037 | 0.032728473 |
| ENSG00000157111 | 1.004909142 | 0           | 0           | -Inf         | 0.032765015 |
| ENSG00000112561 | 96.68815386 | 42.84038106 | 0.443077868 | -1.17436783  | 0.032777711 |
| ENSG00000229151 | 4.850536172 | 0.476994649 | 0.098338541 | -3.346099242 | 3.28E-02    |
| ENSG00000120279 | 3.894650048 | 0.803334892 | 0.206266258 | -2.277420256 | 0.032832354 |
| ENSG00000128040 | 0.230518567 | 2.179249693 | 9.453684029 | 3.240876646  | 0.032941914 |
| ENSG00000120327 | 436.8759628 | 225.7158741 | 0.516658945 | -0.952715846 | 0.033016675 |
| ENSG00000186326 | 1.135887739 | 6.445350047 | 5.674284372 | 2.504438454  | 0.033018136 |
| ENSG00000123500 | 92.39049462 | 2.572214237 | 0.02784068  | -5.166661718 | 0.033165882 |
| ENSG00000052850 | 554.4504486 | 14.21257436 | 0.025633624 | -5.28581873  | 0.033168028 |
| ENSG00000134716 | 2.484849035 | 6.020957923 | 2.423067896 | 1.276834831  | 0.033284389 |
| ENSG00000225492 | 20.18435032 | 0.842238029 | 0.04172728  | -4.582865323 | 0.033334221 |
| ENSG00000267454 | 77.25659838 | 34.49167804 | 0.44645608  | -1.163409839 | 3.34E-02    |
| ENSG00000201793 | 3.559469215 | 0.469954061 | 0.132029253 | -2.921070481 | 0.033471872 |
| ENSG00000162882 | 7.21233902  | 2.817195957 | 0.390607811 | -1.356207296 | 0.033491983 |
| ENSG00000138134 | 165.2418961 | 89.86165585 | 0.543818837 | -0.878801969 | 0.03370193  |
| ENSG00000124145 | 997.3256081 | 1794.570167 | 1.799382421 | 0.847501834  | 0.033714344 |
| ENSG00000201451 | 3.197785255 | 0.316327671 | 0.098920861 | -3.337581393 | 0.033758995 |
| ENSG00000205890 | 6.996744589 | 2.596590236 | 0.371114052 | -1.430065466 | 0.033925884 |
| ENSG00000085741 | 32.26641535 | 1.01291758  | 0.031392318 | -4.993444617 | 0.033952803 |

|                 |             |             |             |              |             |
|-----------------|-------------|-------------|-------------|--------------|-------------|
| ENSG00000236998 | 10.87156498 | 3.395647053 | 0.312342065 | -1.678801217 | 0.034003238 |
| ENSG00000259619 | 0           | 1.203042009 | Inf         | Inf          | 0.034149765 |
| ENSG00000106077 | 288.0290297 | 147.3770814 | 0.511674402 | -0.966702036 | 0.034287504 |
| ENSG00000115107 | 130.9654479 | 76.35981861 | 0.583053163 | -0.778300661 | 0.034341268 |
| ENSG00000106066 | 399.6590839 | 785.6091486 | 1.965698217 | 0.97504185   | 0.034402915 |
| ENSG00000177459 | 4.443872856 | 11.97449354 | 2.694607592 | 1.430075193  | 0.034482646 |
| ENSG00000243910 | 5.005549836 | 1.879249357 | 0.375433153 | -1.413372041 | 0.034518257 |
| ENSG00000119943 | 92.84872787 | 34.72110613 | 0.373953493 | -1.419069235 | 0.034539084 |
| ENSG00000164171 | 644.9711706 | 314.4764232 | 0.487582139 | -1.036282815 | 0.034697387 |
| ENSG00000205929 | 1082.655129 | 364.5524917 | 0.336720791 | -1.570375289 | 0.034761403 |
| ENSG00000211445 | 373.6144263 | 688.6372018 | 1.843176155 | 0.882193958  | 0.034778429 |
| ENSG00000069667 | 436.6177494 | 217.5563607 | 0.498276493 | -1.004981582 | 0.034940753 |
| ENSG00000118640 | 48.24488501 | 24.99019296 | 0.517986372 | -0.949013953 | 0.035089842 |
| ENSG00000070729 | 23.68944587 | 9.045657952 | 0.381843374 | -1.388947104 | 0.035102982 |
| ENSG00000225490 | 4.087960393 | 0.346808962 | 0.084836674 | -3.559168132 | 3.53E-02    |
| ENSG00000054219 | 2.249442073 | 0.649055457 | 0.288540641 | -1.79315356  | 3.56E-02    |
| ENSG00000152208 | 63.46015698 | 202.2245687 | 3.186638331 | 1.672035289  | 0.035591046 |
| ENSG00000248334 | 67.1702299  | 30.03245015 | 0.447109533 | -1.161299787 | 3.56E-02    |
| ENSG00000163359 | 33086.62516 | 523.5399959 | 0.015823312 | -5.981804578 | 0.035614853 |
| ENSG00000076356 | 5219.678974 | 2440.913753 | 0.467636758 | -1.09653976  | 0.035752058 |
| ENSG00000148123 | 136.0895722 | 280.7270352 | 2.06281077  | 1.044611483  | 0.035845319 |
| ENSG00000256682 | 2.490213155 | 0.466982077 | 0.18752695  | -2.414830153 | 0.035963508 |
| ENSG00000008441 | 331.7753171 | 61.91876091 | 0.186628594 | -2.421758053 | 0.036001537 |
| ENSG00000133800 | 18.13377028 | 0.608561593 | 0.033559573 | -4.897131818 | 0.036050514 |
| ENSG00000244588 | 2.562795515 | 0           | 0           | -Inf         | 0.036157877 |
| ENSG00000236754 | 5.562646221 | 0.920253773 | 0.165434532 | -2.59566769  | 3.62E-02    |
| ENSG00000103723 | 860.0995689 | 469.2176065 | 0.545538707 | -0.874246533 | 0.036278868 |
| ENSG00000082781 | 4038.77169  | 8622.213688 | 2.134860386 | 1.094141725  | 0.03640474  |
| ENSG00000125462 | 3.502444657 | 14.67992417 | 4.19133651  | 2.067410356  | 0.036515007 |
| ENSG00000182472 | 1.98441915  | 6.652031143 | 3.35213009  | 1.745078139  | 0.036559304 |
| ENSG00000242020 | 4.095552653 | 0.495429067 | 0.120967573 | -3.047307724 | 0.03656703  |
| ENSG00000266918 | 13.92396874 | 35.1372778  | 2.523510247 | 1.335431945  | 0.036567809 |
| ENSG00000077713 | 167.116804  | 86.33379333 | 0.516607494 | -0.952859523 | 0.036651496 |
| ENSG00000258323 | 2.862372114 | 0.651089759 | 0.2274651   | -2.136282886 | 0.036852838 |
| ENSG00000100767 | 155.3991306 | 41.85124722 | 0.269314552 | -1.892635909 | 0.036912682 |
| ENSG00000196960 | 3.508027456 | 1.160600002 | 0.330841197 | -1.595789203 | 0.036943602 |
| ENSG00000101333 | 754.0835828 | 375.9752502 | 0.498585646 | -1.004086746 | 3.71E-02    |
| ENSG00000182901 | 35.02976169 | 16.40351522 | 0.468273674 | -1.094576161 | 0.037151665 |
| ENSG00000188783 | 38.90018514 | 6.785376301 | 0.174430437 | -2.51927629  | 0.03717049  |
| ENSG00000234883 | 5.250394559 | 1.977363025 | 0.376612272 | -1.408848083 | 0.037265728 |
| ENSG00000256232 | 6.517664466 | 16.89228079 | 2.591769012 | 1.373937146  | 0.037496322 |
| ENSG00000138646 | 115.9332898 | 262.6410327 | 2.265449666 | 1.179797437  | 0.037552024 |
| ENSG00000176532 | 3.624270617 | 1.590060199 | 0.438725572 | -1.188609296 | 3.76E-02    |

|                 |             |             |             |              |             |
|-----------------|-------------|-------------|-------------|--------------|-------------|
| ENSG00000106006 | 8.142514404 | 1.245285539 | 0.15293624  | -2.708997783 | 0.03770378  |
| ENSG00000173809 | 3.859270201 | 1.403918215 | 0.363778161 | -1.458869162 | 0.03793488  |
| ENSG00000244642 | 27.19493361 | 49.48331592 | 1.819578479 | 0.863604276  | 0.037978572 |
| ENSG00000169894 | 15.11870418 | 27.68777527 | 1.831359021 | 0.872914646  | 0.038120265 |
| ENSG00000012171 | 107.8687582 | 57.97430982 | 0.537452278 | -0.895791435 | 0.038194251 |
| ENSG00000102683 | 104.3830623 | 40.43911287 | 0.387410677 | -1.368064379 | 0.038203483 |
| ENSG00000238261 | 288.8299857 | 111.2581803 | 0.385203012 | -1.376309112 | 0.038324818 |
| ENSG00000239268 | 21.6930678  | 9.634459176 | 0.444126173 | -1.170958502 | 0.038515914 |
| ENSG00000177992 | 8.142514404 | 0.304280796 | 0.03736939  | -4.741999175 | 0.038534913 |
| ENSG00000228238 | 1.655458587 | 0.148620104 | 0.089775791 | -3.477529731 | 0.038586999 |
| ENSG00000106991 | 915.4538497 | 134.0929215 | 0.146476987 | -2.771254076 | 0.038745058 |
| ENSG00000104953 | 45.36604796 | 13.27510133 | 0.292621948 | -1.772890112 | 0.038757812 |
| ENSG00000149488 | 6.637213277 | 0.799709863 | 0.1204888   | -3.053029048 | 0.038783494 |
| ENSG00000183196 | 62.72112819 | 140.2306125 | 2.235779499 | 1.160777911  | 0.0388144   |
| ENSG00000196104 | 23.57483287 | 13.04660998 | 0.553412618 | -0.853572557 | 3.90E-02    |
| ENSG00000115828 | 15.72512518 | 4.260879824 | 0.270959994 | -1.883848234 | 0.039194154 |
| ENSG00000106665 | 5554.340604 | 2836.086922 | 0.510607311 | -0.969713899 | 0.039229318 |
| ENSG00000145945 | 7.48150852  | 1.446002806 | 0.193276904 | -2.371258843 | 3.93E-02    |
| ENSG00000258405 | 45.86531749 | 7.512988226 | 0.163805434 | -2.60994488  | 0.039294788 |
| ENSG00000237440 | 326.4593148 | 158.0742147 | 0.484208009 | -1.046301154 | 0.039308612 |
| ENSG00000237697 | 28.03025462 | 7.962930521 | 0.284083417 | -1.815613475 | 0.03935149  |
| ENSG00000269396 | 4.425479421 | 0.889772481 | 0.201056744 | -2.314325369 | 0.039572661 |
| ENSG00000160179 | 648.2465618 | 214.3720186 | 0.330695188 | -1.596426042 | 0.039627443 |
| ENSG00000266965 | 0           | 0.919882978 | Inf         | Inf          | 0.039744733 |
| ENSG00000158859 | 79.32701217 | 40.97942578 | 0.516588545 | -0.952912442 | 0.039783912 |
| ENSG00000260661 | 6.992531567 | 1.765746036 | 0.252518851 | -1.985537004 | 3.98E-02    |
| ENSG00000141934 | 32.01888373 | 132.4096695 | 4.135361827 | 2.048013565  | 0.039863638 |
| ENSG00000214402 | 1.755268456 | 0           | 0           | -Inf         | 3.99E-02    |
| ENSG00000069535 | 6.587952242 | 2.51625794  | 0.381948418 | -1.388550277 | 0.039909208 |
| ENSG00000124205 | 45.61858379 | 1.245285539 | 0.027297768 | -5.19507317  | 0.040157324 |
| ENSG00000167701 | 54.52221731 | 27.21884617 | 0.499224857 | -1.002238324 | 0.040184373 |
| ENSG00000109625 | 2.617578612 | 0.649055457 | 0.247960254 | -2.01181921  | 0.040411669 |
| ENSG00000255150 | 4.536962149 | 1.501959103 | 0.331049511 | -1.594881093 | 0.04046963  |
| ENSG00000264433 | 16.66951144 | 1.225101456 | 0.073493543 | -3.766238687 | 0.040486297 |
| ENSG00000160932 | 457.3909448 | 202.1525305 | 0.441968808 | -1.177983541 | 0.040570343 |
| ENSG00000249487 | 1.725388304 | 0.148620104 | 0.086137192 | -3.537219891 | 4.06E-02    |
| ENSG00000165996 | 335.5346397 | 615.1608933 | 1.833375219 | 0.874502078  | 0.040729636 |
| ENSG00000198585 | 2633.10384  | 1302.23541  | 0.494562877 | -1.015774143 | 0.040836004 |
| ENSG00000269225 | 5.078642016 | 0.466982077 | 0.091950186 | -3.4430037   | 0.040872707 |
| ENSG00000106635 | 1844.668945 | 989.3251936 | 0.53631585  | -0.898845204 | 0.040900695 |
| ENSG00000244731 | 89.96553009 | 46.3689569  | 0.515408033 | -0.956213072 | 4.11E-02    |
| ENSG00000163132 | 146.3132224 | 15.51330546 | 0.106028049 | -3.237482129 | 4.14E-02    |
| ENSG00000133321 | 1.310253432 | 0.160666978 | 0.122622826 | -3.027700537 | 0.041485718 |



|                 |             |             |             |              |             |
|-----------------|-------------|-------------|-------------|--------------|-------------|
| ENSG00000225649 | 53.68668467 | 29.31118146 | 0.545967434 | -0.873113196 | 0.041497219 |
| ENSG00000257831 | 2.491767824 | 0.309287083 | 0.124123556 | -3.010151163 | 0.041512734 |
| ENSG00000166743 | 30.59405888 | 4.962749664 | 0.162212856 | -2.624039933 | 0.041561375 |
| ENSG00000179603 | 24.16524683 | 57.76096509 | 2.390249332 | 1.257161117  | 0.041589023 |
| ENSG00000186815 | 982.5671405 | 541.7747799 | 0.551387033 | -0.858862756 | 4.16E-02    |
| ENSG00000249669 | 13.00226014 | 0           | 0           | -Inf         | 0.041710948 |
| ENSG00000230126 | 0.610686677 | 2.402754618 | 3.934512914 | 1.976185044  | 0.041763968 |
| ENSG00000101638 | 9.876506685 | 28.48314657 | 2.883929255 | 1.528035775  | 0.041821354 |
| ENSG00000265174 | 3.723673108 | 0.148620104 | 0.039912232 | -4.647025238 | 0.041849003 |
| ENSG00000183049 | 1982.464334 | 1053.905801 | 0.531614003 | -0.911548988 | 0.041958593 |
| ENSG00000144771 | 25.22702034 | 1.677064675 | 0.066478904 | -3.910959583 | 0.041968091 |
| ENSG00000136235 | 555.60499   | 1.991728838 | 0.003584793 | -8.123894499 | 4.20E-02    |
| ENSG00000164128 | 196.5246615 | 98.40728216 | 0.500737574 | -0.99787338  | 0.042139213 |
| ENSG00000115594 | 293.1141209 | 41.27626593 | 0.14081978  | -2.828078104 | 4.22E-02    |
| ENSG00000124557 | 0.230518567 | 2.14091583  | 9.287389993 | 3.215273217  | 4.22E-02    |
| ENSG00000263603 | 11.72546432 | 5.080319203 | 0.433272326 | -1.206654002 | 0.042178536 |
| ENSG00000159212 | 56.04911931 | 127.175915  | 2.269008265 | 1.182061864  | 0.04223409  |
| ENSG00000188916 | 142.6671688 | 65.02049392 | 0.455749522 | -1.133686953 | 0.04227369  |
| ENSG00000227321 | 1.979060738 | 0.160666978 | 0.08118345  | -3.622670539 | 0.042317558 |
| ENSG00000243193 | 0           | 0.955370555 | Inf         | Inf          | 0.042599906 |
| ENSG00000155754 | 6.877250152 | 2.565455899 | 0.373035129 | -1.422616598 | 0.042767832 |
| ENSG00000104415 | 102.1323025 | 0.627649055 | 0.006145451 | -7.346265406 | 0.042955981 |
| ENSG00000172209 | 14.28018994 | 5.468804808 | 0.38296443  | -1.384717694 | 0.042957206 |
| ENSG00000176435 | 2.64860796  | 0.148620104 | 0.056112534 | -4.155533125 | 0.04305758  |
| ENSG00000229373 | 5.286093624 | 0.778303462 | 0.147236034 | -2.763797298 | 0.043115049 |
| ENSG00000171951 | 952.2988709 | 475.6116136 | 0.499435238 | -1.001630478 | 0.043204457 |
| ENSG00000133466 | 2009.431438 | 1031.822831 | 0.513489941 | -0.961592079 | 0.043221591 |
| ENSG00000149527 | 47.87300431 | 22.57708191 | 0.471603615 | -1.084353317 | 0.04329377  |
| ENSG00000111262 | 15.10150557 | 2.4423108   | 0.161726312 | -2.628373679 | 0.04334448  |
| ENSG00000064225 | 124.0266794 | 240.4692431 | 1.938850934 | 0.955201888  | 0.043376792 |
| ENSG00000010704 | 44.91114432 | 17.88006741 | 0.398120949 | -1.328721307 | 0.043440942 |
| ENSG00000268442 | 21.39596847 | 9.973289869 | 0.466129396 | -1.101197596 | 0.043471862 |
| ENSG00000075035 | 685.7789927 | 289.2440664 | 0.421774463 | -1.245456347 | 4.35E-02    |
| ENSG00000064201 | 12.12662794 | 3.560296478 | 0.293593281 | -1.768109145 | 0.043539089 |
| ENSG00000218757 | 1.498943378 | 0.160666978 | 0.107186823 | -3.221800537 | 0.043575952 |
| ENSG00000161281 | 4.063293563 | 0.96741743  | 0.238087014 | -2.070439164 | 0.043581356 |
| ENSG00000254238 | 18.65678382 | 4.042950458 | 0.216701362 | -2.206219876 | 0.043607221 |
| ENSG00000126759 | 38.53360264 | 15.76072552 | 0.40901251  | -1.289783126 | 0.043837115 |
| ENSG00000113721 | 4529.154587 | 1687.242576 | 0.372529253 | -1.424574376 | 0.043846554 |
| ENSG00000256913 | 38.92104635 | 71.77923636 | 1.84422679  | 0.883016079  | 0.043967893 |
| ENSG00000145476 | 635.1011293 | 278.2946191 | 0.438189457 | -1.190373321 | 0.044021879 |
| ENSG00000188987 | 1.901584274 | 6.009561708 | 3.160292073 | 1.660057898  | 0.044264726 |
| ENSG00000232564 | 1.359680021 | 0.148620104 | 0.109305206 | -3.193565986 | 0.04431313  |

|                 |             |             |             |              |             |
|-----------------|-------------|-------------|-------------|--------------|-------------|
| ENSG00000204049 | 1.391531735 | 0.155660692 | 0.11186284  | -3.160197227 | 0.044349741 |
| ENSG00000258930 | 1.132087803 | 5.022132512 | 4.43616873  | 2.149314239  | 4.44E-02    |
| ENSG00000248979 | 0.128737137 | 1.96763509  | 15.28412967 | 3.933962497  | 4.44E-02    |
| ENSG00000172889 | 718.8704731 | 1275.157444 | 1.773834776 | 0.826871636  | 0.044410961 |
| ENSG00000168056 | 1659.769625 | 867.2994902 | 0.522542091 | -0.936380843 | 0.044561769 |
| ENSG00000196867 | 813.9585926 | 348.6609312 | 0.428352172 | -1.223130691 | 0.044562029 |
| ENSG00000227486 | 7.910482874 | 2.767344953 | 0.34983262  | -1.515263274 | 0.044582438 |
| ENSG00000255406 | 1.140098858 | 8.709958182 | 7.639651704 | 2.933506866  | 0.044649069 |
| ENSG00000224596 | 3.626970675 | 9.096007837 | 2.507880171 | 1.326468416  | 0.044724509 |
| ENSG00000259964 | 3.399976436 | 0.615602181 | 0.18106072  | -2.465454499 | 0.044775201 |
| ENSG00000167105 | 17.20520922 | 33.72842231 | 1.960361068 | 0.971119401  | 0.04485237  |
| ENSG00000163293 | 8.197152412 | 22.3751285  | 2.729622115 | 1.44870124   | 0.044941619 |
| ENSG00000261970 | 9.592259695 | 2.729538436 | 0.284556353 | -1.813213705 | 0.044944185 |
| ENSG00000143127 | 92.13974291 | 14.94904395 | 0.16224317  | -2.623770351 | 0.044991854 |
| ENSG00000106153 | 2225.483592 | 750.6944676 | 0.337317458 | -1.567821109 | 0.045009504 |
| ENSG00000242602 | 3.367475522 | 0.703630497 | 0.208948957 | -2.25877754  | 0.045071213 |
| ENSG00000171219 | 164.6406504 | 300.0277577 | 1.822318832 | 0.865775394  | 0.045078804 |
| ENSG00000009954 | 14958.56537 | 7971.287562 | 0.532891181 | -0.908087138 | 0.045135761 |
| ENSG00000187258 | 2.951661471 | 0.155660692 | 0.052736635 | -4.245050683 | 0.045213548 |
| ENSG00000140092 | 336.7622203 | 78.74162445 | 0.23381965  | -2.096531917 | 0.045284384 |
| ENSG00000189129 | 22.96126221 | 11.25522352 | 0.490183136 | -1.028607243 | 0.045494478 |
| ENSG00000041982 | 23740.18744 | 2982.356326 | 0.125624801 | -2.992806782 | 0.045515842 |
| ENSG00000184956 | 11.47452763 | 3.393328115 | 0.295727042 | -1.757661922 | 0.045615033 |
| ENSG00000204789 | 42.10306953 | 104.3315267 | 2.478002859 | 1.309177852  | 0.045670966 |
| ENSG00000166888 | 1665.304198 | 849.2113162 | 0.509943659 | -0.971590235 | 0.045688821 |
| ENSG00000159289 | 1.937645204 | 0.160666978 | 0.082918678 | -3.592159077 | 0.045725289 |
| ENSG00000268392 | 11.88694912 | 4.393828025 | 0.369634629 | -1.435828175 | 0.045725725 |
| ENSG00000228809 | 4.352343941 | 0.750141109 | 0.172353362 | -2.536558658 | 0.045848994 |
| ENSG00000236016 | 0.271936004 | 1.702096105 | 6.25917892  | 2.645973417  | 0.04586884  |
| ENSG00000081189 | 408.2316195 | 224.065583  | 0.54886876  | -0.865466866 | 0.045902505 |
| ENSG00000267296 | 1.266592631 | 5.443985234 | 4.298134302 | 2.103710563  | 0.045935549 |
| ENSG00000180875 | 242.2302156 | 59.83647296 | 0.247023159 | -2.017281793 | 4.61E-02    |
| ENSG00000196963 | 164.3719203 | 61.90620705 | 0.376622765 | -1.40880789  | 0.046193253 |
| ENSG00000267838 | 6.745532293 | 2.20566238  | 0.32698122  | -1.612720316 | 0.046203876 |
| ENSG00000111012 | 80.92371134 | 42.28334627 | 0.522508738 | -0.936472932 | 0.046254598 |
| ENSG00000213949 | 2566.41632  | 437.8296249 | 0.170599611 | -2.551313741 | 4.64E-02    |
| ENSG00000239911 | 14.95627631 | 3.800728865 | 0.25412267  | -1.976403014 | 4.64E-02    |
| ENSG00000153802 | 4.135415421 | 0.778303462 | 0.18820442  | -2.409627583 | 0.04656363  |
| ENSG00000247317 | 0.91603287  | 0           | 0           | -Inf         | 0.046591418 |
| ENSG00000198467 | 5780.899561 | 3048.885154 | 0.527406699 | -0.923012199 | 4.68E-02    |
| ENSG00000007402 | 1093.557851 | 538.3315519 | 0.49227533  | -1.022462653 | 0.04695076  |
| ENSG00000248131 | 3.158141165 | 11.55597558 | 3.659106725 | 1.871491495  | 0.047099058 |
| ENSG00000232524 | 3.845866951 | 14.38957489 | 3.741568566 | 1.903643214  | 4.72E-02    |

|                 |             |             |             |              |             |
|-----------------|-------------|-------------|-------------|--------------|-------------|
| ENSG00000133433 | 3.969475772 | 0.798328606 | 0.201116886 | -2.313893878 | 0.047237481 |
| ENSG00000258185 | 0.780843154 | 0           | 0           | -Inf         | 0.047254376 |
| ENSG00000198046 | 686.3442596 | 281.2709136 | 0.409810251 | -1.286972021 | 0.047283413 |
| ENSG00000138315 | 0.99689999  | 0           | 0           | -Inf         | 0.047297882 |
| ENSG00000142156 | 11286.22434 | 6385.137925 | 0.565746146 | -0.821773243 | 0.047313664 |
| ENSG00000128709 | 43.14887376 | 0.627649055 | 0.014546128 | -6.10322098  | 4.75E-02    |
| ENSG00000260910 | 58.68877724 | 14.42445545 | 0.245778769 | -2.024567795 | 0.047554038 |
| ENSG00000118777 | 389.3584751 | 1173.395015 | 3.013662448 | 1.591517834  | 0.047611944 |
| ENSG00000162552 | 79.96810484 | 501.2320672 | 6.267899786 | 2.647982114  | 0.047694929 |
| ENSG00000143669 | 787.5669905 | 1318.796828 | 1.674520192 | 0.743747773  | 0.047936843 |
| ENSG00000225015 | 11.3829099  | 1.941431873 | 0.170556728 | -2.551676425 | 0.048043058 |
| ENSG00000212673 | 13.90898958 | 5.721976655 | 0.41138694  | -1.281432102 | 0.048085443 |
| ENSG00000171408 | 112.1321986 | 42.30371648 | 0.37726645  | -1.406344287 | 0.048164843 |
| ENSG00000267621 | 23.66826453 | 11.0600265  | 0.467293514 | -1.097599082 | 0.048295895 |
| ENSG00000113211 | 39.84562817 | 12.95217187 | 0.325058795 | -1.621227406 | 0.048352867 |
| ENSG00000248174 | 0.89511856  | 5.031209789 | 5.620718877 | 2.49075466   | 0.048395414 |
| ENSG00000134160 | 2.347014287 | 0.148620104 | 0.06332305  | -3.981125434 | 0.048419744 |
| ENSG00000174527 | 28.74682903 | 12.95030367 | 0.450495032 | -1.150416898 | 0.048560588 |
| ENSG00000154237 | 110.7417429 | 58.20991328 | 0.525636601 | -0.927862359 | 0.048568352 |
| ENSG00000133121 | 467.6545984 | 245.1512688 | 0.524214387 | -0.931771145 | 0.048652679 |
| ENSG00000229776 | 17.06994401 | 6.108699216 | 0.357862874 | -1.482521215 | 0.048707308 |
| ENSG00000152953 | 693.1615773 | 298.6610468 | 0.430867862 | -1.214682602 | 0.048878082 |
| ENSG00000259221 | 0.71247001  | 0           | 0           | -Inf         | 0.048937965 |
| ENSG00000197182 | 1.987758584 | 0.311321385 | 0.156619313 | -2.674665966 | 4.91E-02    |
| ENSG00000263612 | 2.56082776  | 0.663136633 | 0.258954016 | -1.949232161 | 0.049289827 |
| ENSG00000108375 | 273.1810211 | 87.48552867 | 0.320247462 | -1.642740958 | 0.04956678  |
| ENSG00000029153 | 555.7650396 | 1121.518671 | 2.017972689 | 1.012906649  | 4.96E-02    |
| ENSG00000255441 | 7.384736958 | 1.993392345 | 0.269934103 | -1.88932084  | 4.96E-02    |
| ENSG00000263146 | 0.271936004 | 1.747755193 | 6.427082718 | 2.68416404   | 0.049728423 |
| ENSG00000222069 | 1.79531802  | 0           | 0           | -Inf         | 0.049845175 |
| ENSG00000225581 | 41.96158374 | 6.753928778 | 0.160955049 | -2.635270259 | 0.049919114 |
| ENSG00000182902 | 155.0371846 | 77.09828696 | 0.497289003 | -1.007843567 | 0.049981907 |

**Supplementary Table 9. Differentially expressed genes in WS compared to TD in neurons.**

| ENSEMBL ID      | Expression TD | Expression WS | Fold-change | Log2(Fold-change) | P-value     |
|-----------------|---------------|---------------|-------------|-------------------|-------------|
| ENSG00000219438 | 0.460544494   | 495.7274727   | 1076.39431  | 10.07199095       | 2.23E-10    |
| ENSG00000268379 | 213.999796    | 20.01062929   | 0.093507703 | -3.418770979      | 8.93E-10    |
| ENSG00000198467 | 1045.214468   | 177.7168664   | 0.170029091 | -2.556146487      | 2.99E-08    |
| ENSG00000007314 | 17.9397565    | 0.391587456   | 0.021827914 | -5.517681949      | 1.63E-07    |
| ENSG00000117154 | 28.92426781   | 237.4575128   | 8.209629171 | 3.037317057       | 2.33E-07    |
| ENSG00000118194 | 94.43004346   | 3.161257285   | 0.033477241 | -4.900675573      | 3.58E-07    |
| ENSG00000231689 | 21.05412242   | 425.6454614   | 20.21672778 | 4.3374776         | 1.37E-06    |
| ENSG00000231205 | 294.0173566   | 59.17038389   | 0.201247928 | -2.312954164      | 2.32E-06    |
| ENSG00000226521 | 18.452828     | 119.492551    | 6.47556846  | 2.695006846       | 2.41E-06    |
| ENSG00000217027 | 0             | 9.673168832   | Inf         | Inf               | 2.91E-05    |
| ENSG00000101417 | 82.71103144   | 11.18271168   | 0.135202179 | -2.886809692      | 3.83E-05    |
| ENSG00000235616 | 0             | 29.3302623    | Inf         | Inf               | 7.83E-05    |
| ENSG00000236330 | 7.674235725   | 0             | 0           | -Inf              | 7.97E-05    |
| ENSG00000213671 | 0.755107481   | 14.05083623   | 18.60773013 | 4.217830173       | 8.16E-05    |
| ENSG00000130182 | 0.381362554   | 13.59382706   | 35.64541644 | 5.155644671       | 9.74E-05    |
| ENSG00000177791 | 51.33556034   | 7.724825111   | 0.150477078 | -2.732384357      | 0.000119159 |
| ENSG00000162761 | 0             | 10.80159677   | Inf         | Inf               | 1.23E-04    |
| ENSG00000235602 | 140.093778    | 39.46797015   | 0.281725361 | -1.827638655      | 0.000132126 |
| ENSG00000265790 | 0.747489854   | 16.39509189   | 21.93353099 | 4.455066179       | 0.000170187 |
| ENSG00000231806 | 10.76795675   | 152.7952521   | 14.18980923 | 3.826783289       | 0.000194114 |
| ENSG00000229231 | 26.03206879   | 3.419524049   | 0.131358137 | -2.928422528      | 0.000199111 |
| ENSG00000259048 | 1.791739754   | 13.957648     | 7.789997386 | 2.961622844       | 0.000211907 |
| ENSG00000159166 | 9.717368105   | 0.391587456   | 0.040297687 | -4.633159167      | 0.000213205 |
| ENSG00000233098 | 103.5320192   | 3469.956799   | 33.51578406 | 5.066768779       | 0.000222008 |
| ENSG00000251441 | 9.131947334   | 0             | 0           | -Inf              | 0.000265233 |
| ENSG00000173868 | 0.373744927   | 12.69167188   | 33.95811141 | 5.08568432        | 0.000266061 |
| ENSG00000228523 | 9.393723057   | 0.463468384   | 0.049338093 | -4.341154228      | 0.000279477 |
| ENSG00000087510 | 3.93888537    | 17.33028661   | 4.399794608 | 2.137436177       | 0.000327829 |
| ENSG00000234643 | 0.957450333   | 10.3447647    | 10.80449224 | 3.433559369       | 0.000371153 |
| ENSG00000159251 | 1193.007745   | 8.932161293   | 0.007487094 | -7.06137839       | 0.000535444 |
| ENSG00000167383 | 1583.970687   | 225.8374441   | 0.142576783 | -2.810189025      | 0.000653915 |
| ENSG00000188488 | 12.48721402   | 0.783174911   | 0.062718146 | -3.994973278      | 0.000685873 |
| ENSG00000180318 | 1.951262012   | 53.36521343   | 27.34907618 | 4.773420196       | 0.000717544 |
| ENSG00000161640 | 0.496905839   | 13.85568477   | 27.88392422 | 4.801361707       | 7.32E-04    |
| ENSG00000234627 | 10.21519212   | 0.86720393    | 0.084893551 | -3.558201232      | 0.000748202 |
| ENSG00000239392 | 2.949335881   | 17.04221447   | 5.7783227   | 2.530650776       | 0.000833034 |
| ENSG00000230832 | 7.41443922    | 28.88613191   | 3.895929422 | 1.961967542       | 0.000916056 |
| ENSG00000130270 | 56.65641754   | 12.56973436   | 0.221858969 | -2.17228522       | 0.000927602 |
| ENSG00000103316 | 6.199693999   | 25.68904438   | 4.143598763 | 2.050884309       | 0.000962997 |

|                 |             |             |             |              |             |
|-----------------|-------------|-------------|-------------|--------------|-------------|
| ENSG00000213115 | 3.813625541 | 126.0553325 | 33.05393546 | 5.046750147  | 0.001140476 |
| ENSG00000268119 | 163.1732868 | 51.07118913 | 0.312987439 | -1.675823336 | 0.001145319 |
| ENSG00000228649 | 12.23547162 | 1.936503937 | 0.15826966  | -2.659543372 | 0.001173282 |
| ENSG00000204252 | 3.573664823 | 15.63131541 | 4.374029514 | 2.128962955  | 0.001194527 |
| ENSG00000159871 | 48.78706661 | 9.490165466 | 0.194522158 | -2.361993595 | 0.001251657 |
| ENSG00000161905 | 12.7418538  | 1.461586772 | 0.114707545 | -3.123967803 | 0.001312344 |
| ENSG00000204860 | 86.73223796 | 25.51333071 | 0.294162025 | -1.765317084 | 0.001536091 |
| ENSG00000229604 | 2.639067371 | 16.08519282 | 6.09502925  | 2.607633144  | 0.001573058 |
| ENSG00000266296 | 6.85229639  | 0.475616475 | 0.069409793 | -3.848716961 | 0.00178891  |
| ENSG00000237872 | 135.9307803 | 51.21072091 | 0.376741168 | -1.408354405 | 0.001869188 |
| ENSG00000250927 | 1.259630948 | 9.074767234 | 7.204306349 | 2.84885953   | 0.001979671 |
| ENSG00000173040 | 393.0192343 | 20.49486335 | 0.052147227 | -4.261265644 | 0.001988445 |
| ENSG00000184254 | 77.19715328 | 12.18463492 | 0.157837879 | -2.663484622 | 0.002044853 |
| ENSG00000112343 | 22.46949464 | 3.5242871   | 0.156847635 | -2.672564316 | 0.002123808 |
| ENSG00000228648 | 32.75956179 | 3.979868853 | 0.121487243 | -3.041123263 | 0.002294537 |
| ENSG00000174343 | 47.22927784 | 9.166682885 | 0.194088991 | -2.365209806 | 2.30E-03    |
| ENSG00000198300 | 23570.53012 | 17.45577715 | 0.000740576 | -10.3990639  | 0.002353445 |
| ENSG00000244280 | 0           | 5.417159443 | Inf         | Inf          | 0.002377809 |
| ENSG00000250268 | 6.010389342 | 0           | 0           | -Inf         | 0.002441347 |
| ENSG00000260442 | 0.921088988 | 8.076406144 | 8.768323421 | 3.132301013  | 0.002533287 |
| ENSG00000249489 | 4.576350649 | 0           | 0           | -Inf         | 0.00277999  |
| ENSG00000253204 | 30.57695337 | 8.206863995 | 0.268400318 | -1.897541716 | 0.002809412 |
| ENSG00000230450 | 2.997577044 | 64.60268285 | 21.55163384 | 4.42972534   | 0.00282004  |
| ENSG00000220685 | 36.04552959 | 8.438217021 | 0.23409885  | -2.094810248 | 0.00282321  |
| ENSG00000227311 | 11.22414091 | 1.937203246 | 0.172592563 | -2.534557796 | 0.002942027 |
| ENSG00000014257 | 9.093039163 | 0.463468384 | 0.05096958  | -4.294219734 | 0.002958788 |
| ENSG00000049540 | 183.9955415 | 62.8005506  | 0.341315611 | -1.550821695 | 0.00305458  |
| ENSG00000204794 | 140.4294248 | 38.09327524 | 0.271262773 | -1.882237021 | 0.003211221 |
| ENSG00000163694 | 33.63951497 | 11.53545121 | 0.34291372  | -1.544082468 | 0.003223687 |
| ENSG00000229106 | 0           | 5.234398779 | Inf         | Inf          | 0.003232471 |
| ENSG00000214121 | 9.474063375 | 1.532768391 | 0.161785744 | -2.627843608 | 0.00328823  |
| ENSG00000188133 | 22.44242477 | 3.456424928 | 0.154012989 | -2.698876063 | 0.003298641 |
| ENSG00000184719 | 72.00329042 | 19.84749806 | 0.275647098 | -1.859105682 | 0.003577776 |
| ENSG00000262179 | 5.979918834 | 0.475616475 | 0.079535607 | -3.652255308 | 0.004426557 |
| ENSG00000235590 | 25.32819431 | 3.132699645 | 0.123684287 | -3.015265869 | 0.00449189  |
| ENSG00000167637 | 825.8293074 | 227.2642174 | 0.275195147 | -1.861473068 | 0.004578788 |
| ENSG00000105122 | 10.09911421 | 41.10809551 | 4.070465454 | 2.025193775  | 0.004615803 |
| ENSG00000260087 | 7.532145779 | 0.534650003 | 0.070982429 | -3.816394245 | 0.004709968 |
| ENSG00000115194 | 80.59125574 | 188.9644199 | 2.344726089 | 1.229419397  | 0.004767256 |
| ENSG00000261116 | 0           | 5.550480134 | Inf         | Inf          | 0.00485875  |
| ENSG00000074370 | 28.35638472 | 8.475423625 | 0.298889429 | -1.742316224 | 0.004872273 |
| ENSG00000170293 | 15.455709   | 48.20485394 | 3.118902792 | 1.641038588  | 0.004900137 |
| ENSG00000006611 | 31.51773479 | 3.052932085 | 0.096863944 | -3.36789645  | 0.00490078  |

|                 |             |             |             |              |             |
|-----------------|-------------|-------------|-------------|--------------|-------------|
| ENSG0000036448  | 531.3471272 | 185.5690475 | 0.349242591 | -1.517698584 | 0.005265463 |
| ENSG00000213333 | 4.907625553 | 0           | 0           | -Inf         | 0.005455927 |
| ENSG00000197320 | 149.9292227 | 53.29906214 | 0.355494821 | -1.492099554 | 0.005456998 |
| ENSG00000215572 | 5.168614221 | 18.49996217 | 3.579288641 | 1.83967289   | 0.005764863 |
| ENSG00000198028 | 611.9459188 | 43.53582918 | 0.071143263 | -3.813129053 | 0.005797368 |
| ENSG00000196126 | 8.719294236 | 0.475616475 | 0.054547589 | -4.19634077  | 0.005944253 |
| ENSG00000250579 | 5.267293605 | 28.69079819 | 5.446971508 | 2.445454321  | 0.005962281 |
| ENSG00000108515 | 206.498553  | 89.10506209 | 0.431504535 | -1.212552373 | 0.006214715 |
| ENSG00000264660 | 3.16355855  | 316.5154029 | 100.050433  | 6.644583601  | 0.006443577 |
| ENSG00000010932 | 14.65709281 | 3.040783994 | 0.207461605 | -2.269083737 | 0.006546474 |
| ENSG00000103710 | 5.100743687 | 15.52399782 | 3.043477339 | 1.605720624  | 0.006610512 |
| ENSG00000123146 | 42.78000905 | 13.69861891 | 0.320210753 | -1.642906339 | 0.006648876 |
| ENSG00000028116 | 33.87969434 | 10.68374104 | 0.31534349  | -1.665003947 | 0.00686951  |
| ENSG00000171517 | 0.921088988 | 7.498889459 | 8.141330055 | 3.025264508  | 0.006944873 |
| ENSG00000226624 | 1.338812887 | 8.611056148 | 6.43185932  | 2.685235852  | 0.006951136 |
| ENSG00000196409 | 261.7811822 | 101.1697317 | 0.386466784 | -1.371583671 | 0.007329037 |
| ENSG00000046889 | 3052.368238 | 1210.153224 | 0.396463706 | -1.334739294 | 0.007379421 |
| ENSG00000138050 | 220.0055526 | 92.09626324 | 0.418608813 | -1.25632541  | 0.007410711 |
| ENSG00000224435 | 0           | 7.767383486 | Inf         | Inf          | 0.007414205 |
| ENSG00000184012 | 2.87661319  | 13.36079849 | 4.644628111 | 2.215563087  | 0.007441228 |
| ENSG00000188171 | 1122.057211 | 441.8617554 | 0.393796102 | -1.344479266 | 0.007512191 |
| ENSG00000113196 | 0.373744927 | 8.675749754 | 23.21302344 | 4.536862537  | 0.007734338 |
| ENSG00000165140 | 2.373248102 | 11.24624937 | 4.738758396 | 2.244509108  | 0.007812606 |
| ENSG00000112499 | 8.775284953 | 0.475616475 | 0.054199548 | -4.205575379 | 0.008039521 |
| ENSG00000262488 | 2.856645477 | 14.56579404 | 5.098915548 | 2.350190443  | 0.0081487   |
| ENSG00000144045 | 9.705718357 | 37.69727148 | 3.884026931 | 1.957553204  | 0.008186138 |
| ENSG00000266441 | 8.60121555  | 0           | 0           | -Inf         | 0.008437583 |
| ENSG00000250917 | 14.11852476 | 1.852474918 | 0.131208816 | -2.930063436 | 0.008617551 |
| ENSG00000185187 | 17.19954593 | 4.951136525 | 0.287864374 | -1.796538842 | 0.008648365 |
| ENSG00000114854 | 66.11984619 | 11.79730892 | 0.178423115 | -2.486625564 | 0.008870023 |
| ENSG00000251107 | 1.683814096 | 8.870264924 | 5.267959774 | 2.397244329  | 0.009004021 |
| ENSG00000230360 | 6.609330002 | 0.926237459 | 0.140140901 | -2.835050022 | 0.009101504 |
| ENSG00000258788 | 22.17992716 | 6.601971973 | 0.297655259 | -1.748285708 | 0.009303327 |
| ENSG00000184811 | 0.762725108 | 13.84609121 | 18.15344882 | 4.182171754  | 0.009406128 |
| ENSG00000153179 | 99.58058457 | 44.15946355 | 0.443454552 | -1.173141838 | 0.009477039 |
| ENSG00000143632 | 232.733734  | 18.06270821 | 0.077611045 | -3.687594217 | 0.009548245 |
| ENSG00000243811 | 2.438921577 | 11.24122558 | 4.609096776 | 2.20448406   | 0.009743418 |
| ENSG00000179750 | 0.841907048 | 6.871930221 | 8.162338393 | 3.028982523  | 0.009895809 |
| ENSG00000249378 | 2.789813623 | 88.36419178 | 31.67386919 | 4.985221209  | 0.009910916 |
| ENSG00000248103 | 35.67488847 | 184.9845479 | 5.185287351 | 2.374423941  | 0.009994209 |
| ENSG00000170421 | 6.737223374 | 33.27442954 | 4.93889362  | 2.304187894  | 0.010152299 |
| ENSG00000261438 | 0.460544494 | 7.72768537  | 16.77945448 | 4.068623908  | 0.010358237 |
| ENSG00000227817 | 5.124635248 | 19.70598243 | 3.845343419 | 1.943112448  | 0.010365914 |

|                 |             |             |             |              |             |
|-----------------|-------------|-------------|-------------|--------------|-------------|
| ENSG00000189171 | 213.02953   | 94.08247349 | 0.441640525 | -1.179055534 | 0.01047221  |
| ENSG00000264714 | 1.8281011   | 11.28028741 | 6.170494295 | 2.625386063  | 0.010560757 |
| ENSG00000100341 | 1.741301533 | 8.74367753  | 5.021346024 | 2.328074145  | 0.010575219 |
| ENSG00000222493 | 0.460544494 | 7.49819015  | 16.28114167 | 4.025129963  | 1.07E-02    |
| ENSG00000198046 | 1703.573048 | 614.641641  | 0.360795589 | -1.470746395 | 0.01068977  |
| ENSG00000197587 | 0.834289421 | 20.75413515 | 24.87642133 | 4.636707052  | 0.010990471 |
| ENSG00000229007 | 5.427974241 | 17.38870611 | 3.20353512  | 1.679664807  | 0.011122461 |
| ENSG00000184898 | 36.05390981 | 13.59818034 | 0.377162433 | -1.406742111 | 0.011633506 |
| ENSG00000118777 | 17.06149953 | 3.860859784 | 0.226290765 | -2.143750385 | 0.011657042 |
| ENSG00000236516 | 0.878268394 | 32.86655716 | 37.42199696 | 5.225814642  | 0.011791567 |
| ENSG00000168306 | 33.43482238 | 11.96466765 | 0.357850492 | -1.48257113  | 0.011844531 |
| ENSG00000228974 | 0.460544494 | 5.082050982 | 11.03487513 | 3.463998399  | 0.011868417 |
| ENSG00000204612 | 1.494979708 | 28.11452924 | 18.80596043 | 4.233118082  | 0.011958233 |
| ENSG00000228236 | 0           | 3.372638612 | Inf         | Inf          | 0.01203505  |
| ENSG00000216522 | 3.015009356 | 15.36671151 | 5.096737588 | 2.349574076  | 0.012036823 |
| ENSG00000187094 | 9.521834269 | 1.318524224 | 0.138473763 | -2.852315442 | 0.012173208 |
| ENSG00000227207 | 4.472152555 | 16.99115285 | 3.799323177 | 1.925742435  | 0.012195747 |
| ENSG00000101470 | 180.1854834 | 17.66439004 | 0.098034479 | -3.350566947 | 0.012311008 |
| ENSG00000196604 | 142.4267523 | 716.7890573 | 5.032685541 | 2.331328456  | 0.01231979  |
| ENSG00000166736 | 0.373744927 | 6.110125628 | 16.34838411 | 4.03107614   | 0.012361953 |
| ENSG00000198161 | 2.339083815 | 9.410883311 | 4.023320264 | 2.008386584  | 0.012403974 |
| ENSG00000229789 | 371.6215299 | 157.1574903 | 0.422896624 | -1.241623053 | 0.012611838 |
| ENSG00000172794 | 1.876342263 | 17.72436558 | 9.44623267  | 3.239739071  | 0.012630579 |
| ENSG00000259803 | 18.88718573 | 5.599072497 | 0.296448215 | -1.754147985 | 0.012779953 |
| ENSG00000250727 | 0           | 4.883274353 | Inf         | Inf          | 0.012918308 |
| ENSG00000258738 | 7.860184944 | 25.32229241 | 3.221589898 | 1.687772853  | 0.013008938 |
| ENSG00000113209 | 1043.861316 | 198.8800991 | 0.190523488 | -2.391959227 | 0.013107267 |
| ENSG00000204099 | 0.381362554 | 10.00983592 | 26.24755842 | 4.714111323  | 0.013258724 |
| ENSG00000184674 | 350.7629795 | 979.6994201 | 2.79305251  | 1.481842697  | 0.013268974 |
| ENSG00000224956 | 10.19027411 | 33.64296458 | 3.301477882 | 1.723111981  | 0.013272911 |
| ENSG00000213774 | 7.548911539 | 0.783174911 | 0.103746733 | -3.268862186 | 0.013385095 |
| ENSG00000187730 | 4.675970571 | 24.01315042 | 5.135436602 | 2.360486936  | 0.013542374 |
| ENSG00000228928 | 13.21139295 | 2.853698849 | 0.216002874 | -2.210877585 | 0.013634672 |
| ENSG00000229593 | 9.240779746 | 30.96070883 | 3.350443326 | 1.744352004  | 0.013722498 |
| ENSG00000111679 | 11.6759094  | 31.67504275 | 2.712854447 | 1.439811645  | 0.013900719 |
| ENSG00000009954 | 7622.322759 | 3559.214892 | 0.466946232 | -1.098671659 | 0.013946599 |
| ENSG00000185201 | 351.0783389 | 72.38440937 | 0.206177372 | -2.278042088 | 0.014533013 |
| ENSG00000163421 | 1.252013321 | 7.803585055 | 6.232829097 | 2.639887155  | 0.014538183 |
| ENSG00000233747 | 4.819787306 | 16.86505086 | 3.499127616 | 1.806995282  | 0.014658951 |
| ENSG00000254389 | 2.368985912 | 9.647017426 | 4.072213928 | 2.025813353  | 0.014690781 |
| ENSG00000196867 | 2643.058716 | 1023.392985 | 0.387200246 | -1.368848225 | 0.014775212 |
| ENSG00000257108 | 6.044685556 | 20.21116416 | 3.3436254   | 1.741413225  | 0.014813558 |
| ENSG00000249176 | 0.841907048 | 5.953208065 | 7.071098976 | 2.821934453  | 0.014974956 |

|                 |             |             |             |              |             |
|-----------------|-------------|-------------|-------------|--------------|-------------|
| ENSG00000234026 | 6.097910803 | 0           | 0           | -Inf         | 0.015018958 |
| ENSG00000204381 | 134.9375882 | 56.06182157 | 0.415464826 | -1.267201755 | 0.015030709 |
| ENSG00000113396 | 25.78983363 | 8.050254738 | 0.312148378 | -1.679696125 | 0.015048388 |
| ENSG00000256843 | 0           | 5.407174884 | Inf         | Inf          | 0.015172417 |
| ENSG00000253869 | 72.06725353 | 31.14629552 | 0.432183745 | -1.210283283 | 0.015250164 |
| ENSG00000168062 | 3.737449271 | 0           | 0           | -Inf         | 0.015352615 |
| ENSG00000215808 | 4.738878577 | 87.81847174 | 18.53148805 | 4.211906827  | 0.015608297 |
| ENSG00000232729 | 272.7426154 | 109.7179492 | 0.402276516 | -1.313740575 | 0.015620346 |
| ENSG00000232393 | 0           | 3.707047764 | Inf         | Inf          | 0.016003912 |
| ENSG00000110195 | 8.222388397 | 0           | 0           | -Inf         | 0.016152954 |
| ENSG00000205890 | 1.712557815 | 8.458251743 | 4.938958365 | 2.304206807  | 0.016176264 |
| ENSG00000225548 | 3.911048405 | 0           | 0           | -Inf         | 0.016234048 |
| ENSG00000255210 | 0           | 5.489739681 | Inf         | Inf          | 0.016449489 |
| ENSG00000198888 | 2761.300464 | 5800.75695  | 2.100733704 | 1.070893293  | 0.016533313 |
| ENSG00000228143 | 8.775973062 | 1.330672314 | 0.151626755 | -2.721403754 | 0.016629628 |
| ENSG00000188002 | 150.7889324 | 346.8748006 | 2.300399606 | 1.201884495  | 0.016637201 |
| ENSG00000267405 | 13.81496712 | 1.318524224 | 0.09544172  | -3.389236147 | 1.67E-02    |
| ENSG00000101335 | 44.44599586 | 8.171427338 | 0.183850697 | -2.443393445 | 0.016891049 |
| ENSG00000266984 | 5.108361314 | 0.391587456 | 0.076656178 | -3.705454116 | 0.016967478 |
| ENSG00000230798 | 24.8306113  | 64.48658259 | 2.597059807 | 1.376879238  | 0.01757512  |
| ENSG00000186150 | 0           | 11.070062   | Inf         | Inf          | 0.017731846 |
| ENSG00000251571 | 16.48472364 | 5.406718277 | 0.327983556 | -1.608304611 | 0.017852441 |
| ENSG00000250131 | 4.008350766 | 18.75612842 | 4.679263247 | 2.226281395  | 1.80E-02    |
| ENSG00000228195 | 3.47555385  | 12.61026041 | 3.628273638 | 1.859283266  | 0.01856926  |
| ENSG00000215016 | 2.989959417 | 0           | 0           | -Inf         | 0.018716186 |
| ENSG00000233830 | 2110.436413 | 1025.198326 | 0.485775511 | -1.041638334 | 0.018743024 |
| ENSG00000188306 | 22.02397898 | 2.602068398 | 0.118147061 | -3.081344348 | 0.018776718 |
| ENSG00000228868 | 0.878268394 | 6.937631443 | 7.899215654 | 2.981709409  | 0.018891802 |
| ENSG00000225462 | 0.834289421 | 6.168459848 | 7.393669022 | 2.886290463  | 0.018939372 |
| ENSG00000232203 | 0           | 2.884174737 | Inf         | Inf          | 0.019002808 |
| ENSG00000228050 | 1.417994827 | 7.842127255 | 5.530434318 | 2.467392783  | 0.019032277 |
| ENSG00000153162 | 32.80659115 | 101.6684727 | 3.099025809 | 1.63181477   | 0.019123223 |
| ENSG00000156463 | 14.6718578  | 3.992016943 | 0.272086671 | -1.877861812 | 0.019164014 |
| ENSG00000237819 | 1.517832589 | 8.184274738 | 5.392079993 | 2.430841899  | 0.019202834 |
| ENSG00000159374 | 5.655115407 | 21.08168754 | 3.72789696  | 1.898361984  | 0.019335699 |
| ENSG00000188112 | 0           | 3.17239776  | Inf         | Inf          | 0.019602661 |
| ENSG00000259500 | 5.027550727 | 0           | 0           | -Inf         | 0.019659179 |
| ENSG00000265417 | 30.96440224 | 90.33894761 | 2.91750982  | 1.544737512  | 0.019701456 |
| ENSG00000170955 | 10.46485796 | 2.041966297 | 0.19512604  | -2.35752177  | 0.019834961 |
| ENSG00000173156 | 6.226240659 | 0.926237459 | 0.148763517 | -2.748907332 | 0.019878103 |
| ENSG00000232362 | 1.252013321 | 7.081150597 | 5.655810909 | 2.499733887  | 0.019964097 |
| ENSG00000213967 | 238.5010429 | 105.8417442 | 0.443778957 | -1.172086834 | 0.020137612 |
| ENSG00000137691 | 72.00830927 | 11.63567329 | 0.161587925 | -2.629608699 | 0.020284137 |



|                 |             |             |             |              |             |
|-----------------|-------------|-------------|-------------|--------------|-------------|
| ENSG00000129667 | 8.178792976 | 20.70262208 | 2.531256402 | 1.339853652  | 0.020421995 |
| ENSG00000127903 | 446.2901166 | 75.33306816 | 0.168798424 | -2.566626664 | 0.020586845 |
| ENSG00000268297 | 0.373744927 | 10.61255942 | 28.39519321 | 4.827574823  | 0.020880849 |
| ENSG00000235677 | 145.8010027 | 398.4083417 | 2.732548708 | 1.450247212  | 0.020917555 |
| ENSG00000163612 | 33.78100353 | 12.48686126 | 0.369641513 | -1.435801305 | 0.020994661 |
| ENSG00000147596 | 0           | 4.083932594 | Inf         | Inf          | 0.021023651 |
| ENSG00000162543 | 148.3257213 | 42.32212561 | 0.285332343 | -1.809284805 | 0.021101855 |
| ENSG00000205212 | 13.60037313 | 637.0566141 | 46.84111297 | 5.54970345   | 0.021245691 |
| ENSG00000065833 | 114.6650417 | 35.57372058 | 0.310240332 | -1.688541844 | 0.021309727 |
| ENSG00000132749 | 4.126429452 | 0.391587456 | 0.094897407 | -3.397487521 | 0.021338212 |
| ENSG00000166265 | 41.7765912  | 91.76253627 | 2.196506073 | 1.135210488  | 0.021373453 |
| ENSG00000143140 | 5.606173907 | 1.010266478 | 0.180206054 | -2.472280615 | 0.021463102 |
| ENSG00000236695 | 0           | 14.07412479 | Inf         | Inf          | 0.021711437 |
| ENSG00000254629 | 25.03517486 | 5.605252204 | 0.223895069 | -2.15910534  | 0.021974941 |
| ENSG00000128408 | 25.77023804 | 7.208046298 | 0.279704296 | -1.838025681 | 0.022085244 |
| ENSG00000168765 | 138.1358688 | 65.44311884 | 0.473759056 | -1.077774573 | 0.0220993   |
| ENSG00000222036 | 1.842177975 | 10.40443193 | 5.647897256 | 2.497713844  | 0.022639865 |
| ENSG00000197496 | 245.8466133 | 98.51093755 | 0.400700812 | -1.319402662 | 0.022971074 |
| ENSG00000240418 | 3.207537523 | 17.03018046 | 5.30942517  | 2.408555675  | 0.023066035 |
| ENSG00000216901 | 18.33975496 | 62.10794636 | 3.386519968 | 1.759803502  | 0.023134779 |
| ENSG00000127507 | 8.058603949 | 1.389705843 | 0.172449949 | -2.53575039  | 0.023492716 |
| ENSG00000104689 | 0.373744927 | 4.307462011 | 11.5251384  | 3.52671217   | 0.02376984  |
| ENSG00000174599 | 791.3100903 | 314.4250939 | 0.39734751  | -1.331526792 | 0.02379723  |
| ENSG00000106682 | 2895.768903 | 1437.642825 | 0.496463245 | -1.010241182 | 0.023946267 |
| ENSG00000162949 | 9.697981031 | 1.174762367 | 0.121134735 | -3.045315477 | 0.024106455 |
| ENSG00000257635 | 2.25008719  | 10.69195565 | 4.751796151 | 2.248472947  | 2.42E-02    |
| ENSG00000230580 | 1.741301533 | 7.338718052 | 4.214501574 | 2.075362022  | 0.024661399 |
| ENSG00000233577 | 0.373744927 | 5.395026793 | 14.43505022 | 3.851504222  | 0.024746299 |
| ENSG00000230787 | 4.728725549 | 13.67307241 | 2.891492066 | 1.531814143  | 0.024804416 |
| ENSG00000136826 | 95.0640814  | 311.3864539 | 3.275542659 | 1.711733938  | 0.024916024 |
| ENSG00000257171 | 10.68614127 | 1.246643295 | 0.116659818 | -3.099620367 | 0.024987161 |
| ENSG00000246863 | 8.246061314 | 0.463468384 | 0.056204819 | -4.153162356 | 0.024999383 |
| ENSG00000260928 | 3.050900433 | 0           | 0           | -Inf         | 0.025101344 |
| ENSG00000121691 | 701.2351625 | 322.2425335 | 0.459535618 | -1.121751409 | 0.025108343 |
| ENSG00000196754 | 0           | 3.288609592 | Inf         | Inf          | 0.025162149 |
| ENSG00000178222 | 10.15205405 | 1.246643295 | 0.122797149 | -3.025651027 | 0.025267813 |
| ENSG00000145536 | 99.42390726 | 180.0542025 | 1.81097492  | 0.856766566  | 0.025293969 |
| ENSG00000232797 | 0.921088988 | 5.989960643 | 6.503129147 | 2.701134075  | 0.025402517 |
| ENSG00000170891 | 73.6429859  | 10.28171241 | 0.139615637 | -2.840467558 | 0.025544448 |
| ENSG00000174059 | 26.09901825 | 4.226995142 | 0.161959929 | -2.626291179 | 0.025902911 |
| ENSG00000267383 | 55.75986881 | 20.86713506 | 0.374232141 | -1.417994626 | 0.026105468 |
| ENSG00000046604 | 117.2784277 | 54.33239416 | 0.463276966 | -1.110053141 | 0.026206361 |
| ENSG00000099958 | 146.933593  | 294.2475577 | 2.002588731 | 1.001866168  | 0.026276384 |

|                 |             |             |             |              |             |
|-----------------|-------------|-------------|-------------|--------------|-------------|
| ENSG00000229695 | 6.427676758 | 0.534650003 | 0.083179354 | -3.587630701 | 0.026398976 |
| ENSG00000250403 | 9.517572079 | 2.792259086 | 0.293379347 | -1.769160779 | 0.026714528 |
| ENSG00000176435 | 0           | 4.811636127 | Inf         | Inf          | 0.026744228 |
| ENSG00000087116 | 106.0664666 | 53.23493294 | 0.501901634 | -0.994523451 | 2.71E-02    |
| ENSG00000226421 | 5.568905808 | 16.63531036 | 2.987177541 | 1.578782986  | 0.027243469 |
| ENSG00000224287 | 48.94665483 | 113.7733375 | 2.324435407 | 1.216880336  | 0.027281507 |
| ENSG00000214980 | 17.47750887 | 5.676433823 | 0.324785063 | -1.62244281  | 2.73E-02    |
| ENSG00000198502 | 2.989959417 | 0           | 0           | -Inf         | 0.027356106 |
| ENSG00000260401 | 0           | 2.909170227 | Inf         | Inf          | 2.74E-02    |
| ENSG00000269640 | 7.184511028 | 21.21035577 | 2.952233727 | 1.561806943  | 0.027695134 |
| ENSG00000176928 | 55.16211549 | 7.81457723  | 0.141665655 | -2.819438056 | 0.027769933 |
| ENSG00000130208 | 6.653779244 | 16.84979465 | 2.532364545 | 1.340485102  | 0.027887957 |
| ENSG00000236557 | 18.06249235 | 1.473734862 | 0.081590892 | -3.615448077 | 0.028758718 |
| ENSG00000231908 | 12.54897507 | 38.97128512 | 3.105535306 | 1.634841969  | 0.028846305 |
| ENSG00000234537 | 0.381362554 | 12.44786245 | 32.64049477 | 5.028591021  | 0.02892979  |
| ENSG00000213214 | 0.373744927 | 6.557184462 | 17.54454438 | 4.132950578  | 0.029009682 |
| ENSG00000214533 | 7.417072763 | 23.66077309 | 3.190041928 | 1.673575386  | 0.029164206 |
| ENSG00000241359 | 9.893984333 | 2.008384866 | 0.202990504 | -2.300515856 | 0.029169722 |
| ENSG00000165929 | 339.4302694 | 134.626376  | 0.396624544 | -1.334154136 | 0.029196654 |
| ENSG00000134184 | 5.442389459 | 0.391587456 | 0.071951384 | -3.796833746 | 0.029559489 |
| ENSG00000196653 | 630.1591672 | 327.8270546 | 0.52022897  | -0.942781354 | 0.029862019 |
| ENSG00000187999 | 21.03974259 | 54.54344096 | 2.592400583 | 1.374288664  | 0.029866148 |
| ENSG00000218574 | 6.839258194 | 0.475616475 | 0.069542114 | -3.84596926  | 0.030037996 |
| ENSG00000167785 | 611.6186726 | 253.8936169 | 0.415117504 | -1.268408327 | 0.030166815 |
| ENSG00000166091 | 0.496905839 | 8.615560309 | 17.33841631 | 4.115900223  | 0.030462241 |
| ENSG00000180535 | 16.26091636 | 4.214847051 | 0.259201078 | -1.947856376 | 0.030708261 |
| ENSG00000248801 | 64.89022128 | 24.78506166 | 0.381953724 | -1.388530238 | 0.031047343 |
| ENSG00000224557 | 572.5817572 | 285.3952076 | 0.498435733 | -1.004520597 | 0.031104951 |
| ENSG00000228670 | 0           | 4.155813523 | Inf         | Inf          | 0.031222533 |
| ENSG00000006638 | 10.48771084 | 2.125995316 | 0.202712999 | -2.302489491 | 0.031280519 |
| ENSG00000077238 | 83.71818828 | 23.60707166 | 0.281982591 | -1.826321997 | 0.031308138 |
| ENSG00000267217 | 48.48893034 | 10.64614343 | 0.219558224 | -2.18732452  | 0.031510865 |
| ENSG00000106638 | 1178.698133 | 606.4164112 | 0.514479827 | -0.958813586 | 0.031593643 |
| ENSG00000188859 | 84.03352197 | 169.8727866 | 2.021488361 | 1.015417897  | 3.18E-02    |
| ENSG00000265579 | 287.7263578 | 134.8806069 | 0.468780851 | -1.093014455 | 0.032257047 |
| ENSG00000241981 | 13.10531378 | 0.86720393  | 0.066171932 | -3.917636791 | 0.032348204 |
| ENSG00000261787 | 56.37223765 | 12.34316501 | 0.218958223 | -2.191272461 | 0.03241315  |
| ENSG00000213438 | 0.460544494 | 5.89067799  | 12.79068161 | 3.677021242  | 0.032414603 |
| ENSG00000230711 | 2.899466071 | 12.39022754 | 4.273279024 | 2.095343521  | 0.032476421 |
| ENSG00000231565 | 0           | 3.420223359 | Inf         | Inf          | 0.032563935 |
| ENSG00000133665 | 119.2032941 | 55.87703914 | 0.468754153 | -1.093096623 | 0.032647286 |
| ENSG00000223668 | 12.59931515 | 4.325726786 | 0.343330311 | -1.542330864 | 0.032788139 |
| ENSG00000268654 | 124.6071572 | 0           | 0           | -Inf         | 0.032970398 |

|                 |             |             |             |              |             |
|-----------------|-------------|-------------|-------------|--------------|-------------|
| ENSG00000256940 | 1.842177975 | 10.65612799 | 5.784526864 | 2.532198961  | 0.033068329 |
| ENSG00000166770 | 1134.687679 | 435.2827078 | 0.383614554 | -1.382270639 | 0.033286549 |
| ENSG00000262902 | 8.454295004 | 22.54720779 | 2.666953043 | 1.415192424  | 0.033327451 |
| ENSG00000268560 | 15.00996327 | 0.463468384 | 0.030877383 | -5.017305709 | 3.35E-02    |
| ENSG00000138496 | 148.0096287 | 69.29836813 | 0.468201757 | -1.094797748 | 0.033791061 |
| ENSG00000226253 | 9.269655391 | 2.138600014 | 0.230709765 | -2.115849028 | 0.033853487 |
| ENSG00000221319 | 40.78247496 | 10.89341802 | 0.267110273 | -1.904492632 | 0.033973609 |
| ENSG00000203635 | 2.380865729 | 10.71841536 | 4.501898292 | 2.170533464  | 0.03408057  |
| ENSG00000232341 | 0           | 2.875588796 | Inf         | Inf          | 0.034295684 |
| ENSG00000204957 | 24.91329202 | 66.32011025 | 2.662037204 | 1.412530734  | 0.034427201 |
| ENSG00000235231 | 27.8311517  | 93.30204312 | 3.352431984 | 1.745208062  | 0.034462178 |
| ENSG00000229567 | 2.746993029 | 9.350142858 | 3.403773784 | 1.767135158  | 0.034541532 |
| ENSG00000176402 | 1.899195144 | 9.01594761  | 4.747246559 | 2.247090981  | 0.034680476 |
| ENSG00000218803 | 1.581779275 | 7.79600673  | 4.928631227 | 2.301187039  | 0.035180701 |
| ENSG00000117595 | 60.86015526 | 117.7978924 | 1.93555031  | 0.952743808  | 0.035194744 |
| ENSG00000196154 | 38.92120095 | 15.57699995 | 0.400218893 | -1.321138822 | 0.03525685  |
| ENSG00000254399 | 54.76216707 | 16.12380062 | 0.29443321  | -1.76398769  | 0.035384946 |
| ENSG00000232274 | 131.5823292 | 38.19894238 | 0.290304501 | -1.784361156 | 0.035417968 |
| ENSG00000225630 | 1538.457688 | 2983.51241  | 1.939287919 | 0.955527011  | 0.035436484 |
| ENSG00000161133 | 3.662191179 | 13.61683612 | 3.718220991 | 1.894612519  | 0.035467081 |
| ENSG00000232627 | 3.201646685 | 22.09844203 | 6.90221133  | 2.787058647  | 0.035468135 |
| ENSG00000248578 | 8.718485625 | 2.993655853 | 0.343368789 | -1.542169184 | 0.035952742 |
| ENSG00000198763 | 3136.21195  | 6010.927924 | 1.916620439 | 0.938564659  | 0.036013399 |
| ENSG00000086967 | 40.16376158 | 15.4484287  | 0.384636003 | -1.378434287 | 0.036111807 |
| ENSG00000105707 | 0           | 2.67349272  | Inf         | Inf          | 0.036205472 |
| ENSG00000266369 | 0.834289421 | 94.57578634 | 113.3608841 | 6.824779104  | 0.036434741 |
| ENSG00000183833 | 607.1151985 | 247.324258  | 0.40737616  | -1.295566541 | 0.036725741 |
| ENSG00000258405 | 346.0066186 | 66.94611581 | 0.193482183 | -2.369727376 | 0.036762528 |
| ENSG00000112812 | 60.73014093 | 121.7955512 | 2.005520641 | 1.003976815  | 0.036915197 |
| ENSG00000101292 | 7.166959017 | 1.401853934 | 0.195599547 | -2.354025069 | 0.037046943 |
| ENSG00000241313 | 8.96007499  | 1.401853934 | 0.156455603 | -2.676174771 | 0.037073176 |
| ENSG00000130305 | 723.0827052 | 383.7788576 | 0.53075375  | -0.913885435 | 0.037195138 |
| ENSG00000237086 | 2.985697227 | 0           | 0           | -Inf         | 0.037436151 |
| ENSG00000267799 | 5.23242898  | 0           | 0           | -Inf         | 0.037616554 |
| ENSG00000238517 | 4.934172213 | 0           | 0           | -Inf         | 0.037850973 |
| ENSG00000111058 | 225.3997711 | 108.796448  | 0.482682158 | -1.050854594 | 0.03808857  |
| ENSG00000132837 | 236.8199275 | 107.1837601 | 0.452596034 | -1.143704151 | 0.038153406 |
| ENSG00000248498 | 19.07622654 | 6.952025761 | 0.364434012 | -1.456270487 | 0.038200061 |
| ENSG00000269349 | 34.95063505 | 8.200198883 | 0.234622314 | -2.091587864 | 0.038456174 |
| ENSG00000236764 | 0.460544494 | 4.382662387 | 9.516262696 | 3.250395098  | 0.038572063 |
| ENSG00000227578 | 1.367556606 | 7.663841954 | 5.604040023 | 2.486467259  | 0.038828405 |
| ENSG00000249266 | 4.276268952 | 0           | 0           | -Inf         | 0.038982045 |
| ENSG00000107438 | 58.54807534 | 105.2963353 | 1.79845938  | 0.846761575  | 0.03915785  |

|                 |             |             |             |              |             |
|-----------------|-------------|-------------|-------------|--------------|-------------|
| ENSG00000250877 | 0.762725108 | 14.29175143 | 18.73774873 | 4.227875724  | 0.039696592 |
| ENSG00000237683 | 22.59900652 | 56.22347688 | 2.487873828 | 1.314913322  | 0.040138865 |
| ENSG00000111319 | 0           | 2.433553753 | Inf         | Inf          | 0.040251732 |
| ENSG00000106089 | 1627.443428 | 864.603219  | 0.531264684 | -0.912497282 | 0.040341621 |
| ENSG00000069011 | 1.367556606 | 11.52811301 | 8.429715418 | 3.075483927  | 0.04048214  |
| ENSG00000238230 | 4.927242695 | 24.15127187 | 4.901579518 | 2.293246728  | 0.040505792 |
| ENSG00000109107 | 251.650743  | 442.589967  | 1.758746911 | 0.81454789   | 4.06E-02    |
| ENSG00000231386 | 3.371321971 | 0           | 0           | -Inf         | 0.040663756 |
| ENSG00000233040 | 32.24505261 | 12.40499577 | 0.384710049 | -1.37815658  | 0.040758747 |
| ENSG00000187870 | 15.76805487 | 182.5677922 | 11.57833314 | 3.533355667  | 0.040922125 |
| ENSG00000248131 | 9.526446226 | 1.174762367 | 0.123315908 | -3.019569172 | 0.040957529 |
| ENSG00000251467 | 4.738878577 | 13.91014853 | 2.935324952 | 1.553520224  | 0.040989268 |
| ENSG00000225774 | 1.252013321 | 9.529164272 | 7.611072594 | 2.928099781  | 0.041026772 |
| ENSG00000259882 | 4.143861765 | 0.534650003 | 0.129022162 | -2.954309199 | 0.041114829 |
| ENSG00000267201 | 0           | 3.276461502 | Inf         | Inf          | 0.041134105 |
| ENSG00000235098 | 30.35715665 | 9.055040819 | 0.298283562 | -1.74524362  | 0.041692749 |
| ENSG00000259419 | 9.543092287 | 3.005803944 | 0.314971694 | -1.666705913 | 0.042044753 |
| ENSG00000231233 | 4.579356319 | 0.391587456 | 0.085511462 | -3.547738371 | 0.042127387 |
| ENSG00000162390 | 36.71085419 | 15.88860852 | 0.432804108 | -1.208213901 | 0.042138595 |
| ENSG00000263017 | 0.496905839 | 4.756164748 | 9.571561391 | 3.258754288  | 0.042206063 |
| ENSG00000253950 | 0           | 5.337700189 | Inf         | Inf          | 0.042274196 |
| ENSG00000086730 | 94.87711827 | 42.60374912 | 0.449041348 | -1.155079798 | 0.042278549 |
| ENSG00000172123 | 121.0050498 | 51.01721594 | 0.421612288 | -1.246011179 | 0.042365867 |
| ENSG00000251429 | 112.3759609 | 56.34486338 | 0.501396054 | -0.995977453 | 0.042471016 |
| ENSG00000218857 | 5.82836397  | 1.258791386 | 0.215976798 | -2.211051762 | 0.042597883 |
| ENSG00000198886 | 10874.96676 | 20106.40144 | 1.848870152 | 0.886643906  | 0.042655572 |
| ENSG00000125414 | 49.83123622 | 0.85505584  | 0.017159033 | -5.864887916 | 0.042661911 |
| ENSG00000142910 | 3.108858139 | 0           | 0           | -Inf         | 0.042702032 |
| ENSG00000142405 | 4.891351619 | 15.56765167 | 3.182689139 | 1.670246252  | 0.042846227 |
| ENSG00000225972 | 437.5001307 | 897.8196569 | 2.052158603 | 1.037142235  | 0.042984192 |
| ENSG00000234840 | 21.88155069 | 3.504252378 | 0.160146437 | -2.642536395 | 0.043018534 |
| ENSG00000174950 | 0           | 3.149109194 | Inf         | Inf          | 0.043078206 |
| ENSG00000234491 | 0           | 2.76966983  | Inf         | Inf          | 0.043082774 |
| ENSG00000237440 | 1544.020356 | 833.2771077 | 0.539680131 | -0.889823522 | 0.043312    |
| ENSG00000119411 | 14.28899852 | 29.45055591 | 2.061065082 | 1.043390061  | 0.043461108 |
| ENSG00000253439 | 7.141438809 | 20.4877613  | 2.868856242 | 1.520475677  | 0.043614189 |
| ENSG00000089116 | 364.6850339 | 946.1121451 | 2.594326768 | 1.375360205  | 0.043639384 |
| ENSG00000213370 | 2.972188762 | 9.053333894 | 3.046015788 | 1.606923419  | 0.043950874 |
| ENSG00000217239 | 7.36353073  | 1.81843688  | 0.246951761 | -2.017698839 | 0.044058701 |
| ENSG00000257113 | 3.144629517 | 0           | 0           | -Inf         | 0.044218503 |
| ENSG00000268723 | 35.76942536 | 17.2813255  | 0.483131203 | -1.049513063 | 0.044530747 |
| ENSG00000166289 | 33.08301216 | 68.85934681 | 2.081411042 | 1.0575619    | 0.04456787  |
| ENSG00000221539 | 18.02760617 | 4.812092733 | 0.266929102 | -1.905471489 | 0.044822762 |

|                 |             |             |             |              |             |
|-----------------|-------------|-------------|-------------|--------------|-------------|
| ENSG00000267745 | 8.38997619  | 1.902465899 | 0.226754624 | -2.140796122 | 0.045037685 |
| ENSG00000152779 | 3.733187081 | 25.55973987 | 6.846627107 | 2.77539344   | 0.045260002 |
| ENSG00000260682 | 34.50448422 | 10.67222923 | 0.309299776 | -1.692922307 | 0.045262016 |
| ENSG00000135744 | 72.48313094 | 21.26683218 | 0.293403885 | -1.769040123 | 0.045564895 |
| ENSG00000159556 | 0.381362554 | 6.1465699   | 16.11739232 | 4.01054644   | 0.045899119 |
| ENSG00000242435 | 0           | 3.969884294 | Inf         | Inf          | 0.045929313 |
| ENSG00000116833 | 29.21505753 | 90.29454814 | 3.090685276 | 1.627926752  | 0.046057851 |
| ENSG00000233221 | 0.373744927 | 4.929703184 | 13.19002032 | 3.721374882  | 0.046151479 |
| ENSG00000181333 | 13.66180597 | 37.26805246 | 2.727900875 | 1.447791221  | 0.046260548 |
| ENSG00000157111 | 0           | 2.68564081  | Inf         | Inf          | 0.046326855 |
| ENSG00000259098 | 26.06054705 | 7.013074522 | 0.269106957 | -1.893748405 | 0.046375682 |
| ENSG00000225986 | 5.002162445 | 0           | 0           | -Inf         | 0.046660086 |
| ENSG00000049541 | 721.787514  | 387.5855542 | 0.536980131 | -0.897059386 | 0.046703464 |
| ENSG00000189002 | 75.61183629 | 35.95102126 | 0.475468168 | -1.072579338 | 0.046718838 |
| ENSG00000268660 | 31.78647511 | 12.76147197 | 0.401474902 | -1.316618295 | 0.046821041 |
| ENSG00000235635 | 2.662390521 | 17.33162479 | 6.509798114 | 2.702612802  | 0.046902544 |
| ENSG00000177910 | 0.381362554 | 4.682576895 | 12.27854398 | 3.618067588  | 0.04706171  |
| ENSG00000182698 | 0           | 8.970769097 | Inf         | Inf          | 0.047799395 |
| ENSG00000254331 | 27.16312759 | 55.59974268 | 2.046882948 | 1.033428604  | 0.047805322 |
| ENSG00000257331 | 6.122238848 | 1.330672314 | 0.217350604 | -2.201903987 | 0.048023683 |
| ENSG00000264148 | 0.460544494 | 7.818530383 | 16.97671015 | 4.085485006  | 0.048026533 |
| ENSG00000135828 | 196.2045857 | 451.8784823 | 2.303098477 | 1.2035761    | 0.04804931  |
| ENSG00000225528 | 0.381362554 | 3.731343945 | 9.784243117 | 3.290460252  | 0.048992384 |
| ENSG00000245248 | 16.33905962 | 5.616700985 | 0.343759134 | -1.540530047 | 0.049340971 |
| ENSG00000188825 | 52.95998888 | 110.8497453 | 2.093084754 | 1.065630731  | 0.049556345 |

**Supplementary Table 10. Most significant ( $p < 0.05$ ) enriched GO terms in NPCs of WS compared to TD samples (continued from Extended Data Table 2).**

| Down-regulated genes in WS compared to TD in NPC cells |                                    |               |          |                                                                                                                                                                                                                                                                                                                                                                                                                                                                                                                                                                                                                                                                                                                                                                                                                                                                                                                                                                                                                                                                                                                                                                                                                                                                                                                                                                                                                                                                                                                                                                                                                                                                                                                                                                                                                                                                                                                                                                                                                                                                                                                                                                                                                                                                                                                                                                                                                                                                                                                                                                                                                                                                                                                                                                                                                                                                                                                                                                                                                                                                                                                                                                                                                                                                                                                                                                                                                                                                                                                                                                                                                                                                 |
|--------------------------------------------------------|------------------------------------|---------------|----------|-----------------------------------------------------------------------------------------------------------------------------------------------------------------------------------------------------------------------------------------------------------------------------------------------------------------------------------------------------------------------------------------------------------------------------------------------------------------------------------------------------------------------------------------------------------------------------------------------------------------------------------------------------------------------------------------------------------------------------------------------------------------------------------------------------------------------------------------------------------------------------------------------------------------------------------------------------------------------------------------------------------------------------------------------------------------------------------------------------------------------------------------------------------------------------------------------------------------------------------------------------------------------------------------------------------------------------------------------------------------------------------------------------------------------------------------------------------------------------------------------------------------------------------------------------------------------------------------------------------------------------------------------------------------------------------------------------------------------------------------------------------------------------------------------------------------------------------------------------------------------------------------------------------------------------------------------------------------------------------------------------------------------------------------------------------------------------------------------------------------------------------------------------------------------------------------------------------------------------------------------------------------------------------------------------------------------------------------------------------------------------------------------------------------------------------------------------------------------------------------------------------------------------------------------------------------------------------------------------------------------------------------------------------------------------------------------------------------------------------------------------------------------------------------------------------------------------------------------------------------------------------------------------------------------------------------------------------------------------------------------------------------------------------------------------------------------------------------------------------------------------------------------------------------------------------------------------------------------------------------------------------------------------------------------------------------------------------------------------------------------------------------------------------------------------------------------------------------------------------------------------------------------------------------------------------------------------------------------------------------------------------------------------------------|
| GO TERM                                                | GO Description                     | -Log(p-value) | P-value  | Genes                                                                                                                                                                                                                                                                                                                                                                                                                                                                                                                                                                                                                                                                                                                                                                                                                                                                                                                                                                                                                                                                                                                                                                                                                                                                                                                                                                                                                                                                                                                                                                                                                                                                                                                                                                                                                                                                                                                                                                                                                                                                                                                                                                                                                                                                                                                                                                                                                                                                                                                                                                                                                                                                                                                                                                                                                                                                                                                                                                                                                                                                                                                                                                                                                                                                                                                                                                                                                                                                                                                                                                                                                                                           |
| GO:0009790                                             | embryo development                 | 7.199174362   | 6.32E-08 | WNT16,RARB,MEF2C,WNT11,LAMB1,MMP9,FLT1,COBL,ENG,COL1A1,TFEB,FN1,INHBA,BMP2,SIX1,PDGFRA,TRIB3,HEY2,COL6A1,ZIC3,MMP14,ITGB2,MSX1,FZD5,ITGA2,DACT1,SIX2,RARG,TH,GREM2,TBX1,ALDH1A3,POU5F1                                                                                                                                                                                                                                                                                                                                                                                                                                                                                                                                                                                                                                                                                                                                                                                                                                                                                                                                                                                                                                                                                                                                                                                                                                                                                                                                                                                                                                                                                                                                                                                                                                                                                                                                                                                                                                                                                                                                                                                                                                                                                                                                                                                                                                                                                                                                                                                                                                                                                                                                                                                                                                                                                                                                                                                                                                                                                                                                                                                                                                                                                                                                                                                                                                                                                                                                                                                                                                                                          |
| GO:0003013                                             | circulatory system process         | 6.777192519   | 1.67E-07 | ACSM3,ATP1A2,PTGS2,SGCG,ENG,CXCL12,POMC,SGK1,EDN3,HTR1B,AGT,EDNRA,GUCY1A3,COL1A2,ANPEP,NPR1,SGCD,GAS6,SCN5A,SGCZ,PDE2A,MME                                                                                                                                                                                                                                                                                                                                                                                                                                                                                                                                                                                                                                                                                                                                                                                                                                                                                                                                                                                                                                                                                                                                                                                                                                                                                                                                                                                                                                                                                                                                                                                                                                                                                                                                                                                                                                                                                                                                                                                                                                                                                                                                                                                                                                                                                                                                                                                                                                                                                                                                                                                                                                                                                                                                                                                                                                                                                                                                                                                                                                                                                                                                                                                                                                                                                                                                                                                                                                                                                                                                      |
| GO:0030154                                             | cell differentiation               | 6.083418677   | 8.25E-07 | WNT16,TFAP2B,CD4,SEMA3B,RUNX3,IBSP,TNC,CAMK2B,RORA,EPHA8,PLXNA2,MEF2C,WNT11,LAMB1,DSP,NEFH,MMP9,HCK,SGCG,FLT1,MET,COBL,ENG,PITX3,CPT1A,PDGFRB,FN1,LPPR4,BCL11A,CAT,INHBA,BMP2,SIX1,CDH15,SERPINF1,PDGFRA,HEY2,WNT10A,MYO7A,MSTN,ARHGAP24,COL6A1,COL6A2,ITGA10,CASQ1,LEFTY2,EPHA5,DCDC2,CACNA1C,IGSF10,UNC5D,ZIC3,MMP14,CACNA1D,NBL1,STC1,ITGB2,BRINP3,FZD5,COL6A3,ELF3,HEYL,PITX2,ITGA2,DACT2,ANPEP,BATF2,EFNA1,GPR183,ALCAM,SIX2,SGCD,HAS2,PTGER4,SSH3,ABLIM3,TDRD12,SPATA31E1,TH,ADGRB1,FES,CSF1R,NTM,CAMK1D,GAS6,OPCML,SCN5A,TBX1,SGCZ,TNFAIP2,NTF3,RTN4RL1,PDE2A,DNER,VWC2,TDRD7,AKR1C3,RYR1,POU5F1,ITGA1,GSTA1                                                                                                                                                                                                                                                                                                                                                                                                                                                                                                                                                                                                                                                                                                                                                                                                                                                                                                                                                                                                                                                                                                                                                                                                                                                                                                                                                                                                                                                                                                                                                                                                                                                                                                                                                                                                                                                                                                                                                                                                                                                                                                                                                                                                                                                                                                                                                                                                                                                                                                                                                                                                                                                                                                                                                                                                                                                                                                                                                                                                                                             |
| GO:0040011                                             | locomotion                         | 5.638353366   | 2.30E-06 | CD4,SEMA3B,ADGRA2,EPHA8,PLXNA2,MEF2C,LAMB1,MMP9,FERMT1,HCK,PLP2,FLT1,MET,ENG,CXCL12,COL1A1,PDGFRB,FN1,VAMP8,EDN3,SIX1,ADGRE2,ATP1A4,PDGFRA,GAS8,COL6A1,COL6A2,ITGA10,EPHA5,DCDC2,CACNA1C,UNC5D,CACNA1D,ITGB2,FGFR4,CXCL16,COL6A3,PITX2,ITGA2,COL1A2,SYK,EFNA1,PTAFR,ALCAM,SIX2,SGCZ,ABLIM3,CMKLR1,FES,GAS6,SCN5A,TBX1,NTF3,DNER,ITGA1                                                                                                                                                                                                                                                                                                                                                                                                                                                                                                                                                                                                                                                                                                                                                                                                                                                                                                                                                                                                                                                                                                                                                                                                                                                                                                                                                                                                                                                                                                                                                                                                                                                                                                                                                                                                                                                                                                                                                                                                                                                                                                                                                                                                                                                                                                                                                                                                                                                                                                                                                                                                                                                                                                                                                                                                                                                                                                                                                                                                                                                                                                                                                                                                                                                                                                                           |
| GO:0007267                                             | cell-cell signaling                | 5.204158202   | 6.25E-06 | ABCC8,SEMA3B,CAMK2B,TSPAN32,MEF2C,KCNK2,TFAP2C,KCNK6,AP3B2,WISP1,VIPR2,STX1A,KCNA1,PCDHB2,PCDHB5,PCDHB6,POMC,GRIA2,PCDHB14,INHBA,ADGRE5,TNFAIP6,EDN3,BMP2,SIX1,ADCY4,TBX3,AGT,GABRB2,HTR2C,GABRA2,CACNA1D,FGF17,ITGB2,FZD5,GRIK2,HCN1,EFNA1,KCND3,PDE7B,PCDHB9,TH,GRID1,SCN5A,NTF3,CHRNA2,PCDHB11,POU5F1                                                                                                                                                                                                                                                                                                                                                                                                                                                                                                                                                                                                                                                                                                                                                                                                                                                                                                                                                                                                                                                                                                                                                                                                                                                                                                                                                                                                                                                                                                                                                                                                                                                                                                                                                                                                                                                                                                                                                                                                                                                                                                                                                                                                                                                                                                                                                                                                                                                                                                                                                                                                                                                                                                                                                                                                                                                                                                                                                                                                                                                                                                                                                                                                                                                                                                                                                        |
| GO:0005575                                             | Cellular component                 | 4.910992652   | 1.23E-05 | TNMD,WNT16,DBNDD1,CALCR,ACSM3,ABCC8,TBXA2R,SCIN,SCN4A,CACNA2D2,MYLIP,TFAP2B,NFIX,MMP25,BAZ1B,CD4,HFE,SYT7,DCN,SEMA3B,SLC7A14,CLDN11,GPRC5A,ACPP,SLC38A5,ATP1A2,ADGRA2,RUNX3,EHD2,VRK2,IBSP,TNC,FAM65C,TG,LAMC3,PTGER3,CYBA,ALX4,ENTPD2,LY75,MCOLN3,CAMK2B,TSPAN32,ATP2C2,FA2R,TLE2,BCL3,MAOB,RORA,FRMPD1,CNGB1,EPHA8,WBSR22,MYO3B,TP63,PTGS2,ATP2A3,MGLL,WSCD2,PLXNA2,PAG1,RARB,CAPN6,SLC25A43,ITM2A,BRINP1,RUNX1T1,MEF2C,ATP8B1,IL12RB2,KCNK2,SERTAD4,COL16A1,WNT11,ADAMTS2,TFAP2C,FXD5,LAMB1,SLC17A6,GABRP,CYP26A1,DSP,KCNK6,SUSD2,PRODH,NEFH,APOL4,SLC10A1,SLC8A3,PAPLN,MMP9,FERMT1,PLCB4,HCK,PXMP4,BPI,MAP1LC3A,SRPX,MCF2,PLP2,ASB9,KLF8,NALCN,ACP5,SGCG,FLT1,WFDCC1,CRISPLD2,CRYM,RASL12,AP3B2,PDGFR,CPQ,WISP1,NDRG1,TNNT1,MET,HOXA5,HOXA6,VIPR2,ABHD11,COBL,STX1A,CHCHD2,PCOLCE,BCL7B,TBL2,CLIP2,ECM2,ENG,PTGDS,CXCL12,PITX3,RNF43,PNPO,COL1A1,SULT1E1,CPZ,CPT1A,ELMOD1,TCIRG1,CYP27B1,TNS2,KCNA1,L,TBR,OAS3,VDR,ADGR1,TPD52L1,EYA4,TRIM38,ARFGEF3,TFEB,PRPH2,PCDHB2,PCDHB5,PCDHB6,SLC27A6,PDGFRB,PXSL,STEAP3,POMC,EFEMP1,FN1,IL1R1,QPCT,PLCL1,PRRX1,ANGPTL1,PDZ,TFAP2E,LPPR5,LPPR4,SLC8A2,TNNT2,SGK1,VAMP8,PCDH17,LTBP2,GPR68,BCL11A,GRIA2,MYCT1,PCDHB14,PCDHB12,TEX11,ENOX1,DNAJC15,GLT8D2,ECHDC2,CAT,SLITRK3,CPX2,XPNPEP2,INHBA,ADGRE5,COL10A1,NMI,EDN3,PMEPA1,IQSEC2,COL21A1,CPNE5,IRF1,NKX2-4,BMP2,PCSK2,TCF15,CFP,SIX1,HSPA2,EVI2A,ARMCX1,OMD,BCL11B,PTPRB,ADGRE2,KLF2,TUBA4A,ZNF835,FGI2,HOXD9,CGNL1,ISLR,ADCY4,CDH15,DPP6,SULT4A1,FIBCD1,IDO1,RAP1GAP2,SERPINF1,ATP1A4,KANK4,MYBPH,STARD13,RARRES3,GSTT2B,C1QTNF6,LYVE1,TRPM1,IAH1,ECHDC3,RERG,PDGFRA,ADAMTS8,TBX3,HTR1B,HEY2,DYSF,AGT,SLC19A3,WNT10A,LMO7,GPNMB,RAPGEF5,GALNT5,MYO7A,ARHGAP20,IFI44L,IFI44,EMILIN1,STAMBPL1,CH25H,OIT3,ADAMTS14,MSTN,ARHGAP24,PCDH10,RBP5,KERA,SLC46A3,GALNT6,FBLN5,DISP2,ADAMTS17,MCTP2,CDH11,GAS8,FEM1A,COL6A1,COL6A2,NTN5,ADAMTS10,FCN3,BEST4,ITGA10,CASQ1,RGS16,HMCN1,CTSK,SUSD4,LEFTY2,ZNF385B,TMEFF2,UNC80,SLC22A14,LRTM1,EPHA5,CYP4V2,ADAMTS16,HAPLN1,ARHGAP26,SLC25A48,C1QTNF2,GABRB2,FAM50B,DCDC2,PLA2G7,MLIP,SLC22A3,HTR2C,IGSF1,SLC26A7,LCN9,SLC5A12,ADAM33,TMC2,PLCH2,LYPD6B,CACNA2D4,CACNA1C,CCDC3,ANO4,EDNRA,GABRA2,ZSCAN1,IGSF10,PLA2R1,TMPRSS11D,MCOLN2,FAM134B,LRRK1,ABCA6,MMP21,FZD5,CNTNAP5,SPAG17,PPARGC1B,SLC24A2,SLA,GNA14,WIF1,UNC5D,ZIC3,TMEM171,MMP14,CACNA1D,RNF207,NBL1,FGF17,ADAMTS4,STC1,GOLGA6A,C1R,LYPD5,ABCG1,ITGB2,PTH1R,AZGP1,FGFR4,LY6E,COX7A1,PLXDC1,ALOX15,CXCL16,ITH3,DHRS3,TMCO4,BRINP3,SNED1,HAAO,CTSS,MSX1,C1QTNF7,S100A11,ARHGAP25,FZD5,COL6A3,ELF3,IGFBP7,SERPINI1,ALB,CDSCP1,HEYL,MST1R,PITX2,PRSS12,NDST3,GUCY1A3,NPY1R,NPY5R,ITGA2,EDIL3,KLKB1,ACSL6,GRIK2,TLX3,HCN1,COL1A2,CHMP4C,SYK,AKR1E2,DACT1,VWA2,TC2N,MFAP4,ACSM1,LDHD,ANPEP,STAT6,PRRX2,GPT,SOST,ENTPD3,LTBP3,BATF2,NPNT,FSTL5,PARM1,FAM110B,AFAP1L2,GSG1L,EFNA1,PTAFR,NPR1,GPR183,BNC1,PCDH7,REPS2,TM4SF1,ALCAM,SLC16A5,LRRN2,MGMT,SIX2,SGCD,CYTL1,PRKCDPB,HAS2,SOSTDC1,KCND3,PDE7B,PTGER4,NINJ2,SCG2,SYNPO,CALB2,GPR22,SYNPO2,COL6A5,RARG,SSH3,GXYLT2,HPSE2,ARPP21,EVC2,BNC2,ABLIM3,CSPG4,ADGRG2,TDRD12,C1QTNF1,GLIS1,GALNTL6,MYO1H,CMKLR1,LINC00116,ZNF135,VPS37D,CLEC14A,SYNE3,SLCO3A1,LY6H,EPS8L2,HIC1,PCDHB9,SPATA31E1,RNF212,MSC,SLC17A8,LSMEM2,ZNF154,TH,GPR139,MAB21L1,GREM2,PENK,ADGRB1,SLC9A9,MGAT4C,UBA7,C1S,FES,CSF1R,HS3ST4,NTM,GRID1,RGS7,SLC25A18,CAMK1D,GAS6,SYNDIGL,OPCML,OLFML1,SCN5A,TBX1,ALDH1A3,PKP3,SLITRK6,TMEM173,FAM19A3,MUC6,ANKS1B,SGCZ,TNFAIP2,SOC31,IFNLR1,PRKG1,FAM212A,NTF3,C11orf87,EVI2B,RTN4RL1,GSAP,THBS2,CYP4X1,PDE2A,TPCN1,QRFP,NPSR1,GJA4,NHLRC1,THSD4,FAM69C,DNER,OR7D2,CLEC2A,CERKL,NKAIN2,VWC2,PRELP,HACD4,SP6,ANKRD34B,PLAC9,SPOCK3,TDRD7,HLA-DRB1,AKR1C3,RYR1,MME,LAMA2,CHRNA2,CHRNA3,PCDHB11,ADAMTS12,ZNF578 |
| GO:0022857                                             | transmembrane transporter activity | 4.411444833   | 3.88E-05 | ABCC8,SCN4A,SLC7A14,SLC38A5,ATP1A2,ATP2C2,CNGB1,ATP2A3,KCNK2,FXD5,SLC17A6,GABRP,KCNK6,SLC10A1,SLC8A3,PLP2,NALCN,TCIRG1,KCNA1,SLC8A2,GRIA2,ATP1A4,TRPM1,ADAMTS8,SLC19A3,BEST4,SLC22A14,GABRB2,SLC22A3,                                                                                                                                                                                                                                                                                                                                                                                                                                                                                                                                                                                                                                                                                                                                                                                                                                                                                                                                                                                                                                                                                                                                                                                                                                                                                                                                                                                                                                                                                                                                                                                                                                                                                                                                                                                                                                                                                                                                                                                                                                                                                                                                                                                                                                                                                                                                                                                                                                                                                                                                                                                                                                                                                                                                                                                                                                                                                                                                                                                                                                                                                                                                                                                                                                                                                                                                                                                                                                                           |

|            |                                                          |             |             |                                                                                                                                                                                                                                                                                                                                                                                                                                                                                                                                                                                                                                                                                                                                                                                                                                                                                                                                                                                                                                                                                                                                                                                                                                                                                                                                                                                                                                                                                                                                                                                                                                                                                                                                                                                                                                                                                                                                                                                                                                                                                                                                                                                                                                                                                                                                                                                                                                                                                                                                                                                                                                                                                                                                                                                                                                                                                                                                                                                                                                                                                                                                                                                                                                                                                                                                                                                                                                                                                                                                                                                                                                                                                                                                                                                                                                                                                                                                                                                                                                                                                                                                                                                                                                                                                              |
|------------|----------------------------------------------------------|-------------|-------------|----------------------------------------------------------------------------------------------------------------------------------------------------------------------------------------------------------------------------------------------------------------------------------------------------------------------------------------------------------------------------------------------------------------------------------------------------------------------------------------------------------------------------------------------------------------------------------------------------------------------------------------------------------------------------------------------------------------------------------------------------------------------------------------------------------------------------------------------------------------------------------------------------------------------------------------------------------------------------------------------------------------------------------------------------------------------------------------------------------------------------------------------------------------------------------------------------------------------------------------------------------------------------------------------------------------------------------------------------------------------------------------------------------------------------------------------------------------------------------------------------------------------------------------------------------------------------------------------------------------------------------------------------------------------------------------------------------------------------------------------------------------------------------------------------------------------------------------------------------------------------------------------------------------------------------------------------------------------------------------------------------------------------------------------------------------------------------------------------------------------------------------------------------------------------------------------------------------------------------------------------------------------------------------------------------------------------------------------------------------------------------------------------------------------------------------------------------------------------------------------------------------------------------------------------------------------------------------------------------------------------------------------------------------------------------------------------------------------------------------------------------------------------------------------------------------------------------------------------------------------------------------------------------------------------------------------------------------------------------------------------------------------------------------------------------------------------------------------------------------------------------------------------------------------------------------------------------------------------------------------------------------------------------------------------------------------------------------------------------------------------------------------------------------------------------------------------------------------------------------------------------------------------------------------------------------------------------------------------------------------------------------------------------------------------------------------------------------------------------------------------------------------------------------------------------------------------------------------------------------------------------------------------------------------------------------------------------------------------------------------------------------------------------------------------------------------------------------------------------------------------------------------------------------------------------------------------------------------------------------------------------------------------------------------|
|            |                                                          |             |             | SLC26A7, SLC5A12, CACNA2D4, CACNA1C, ANO4, GABRA2, SLC24A2, CACNA1D, ABCG1, AZGP1, COX7A1, GRIK2, HCN1, SLC16A5, KCND3, SLC17A8, SLC9A9, GRID1, SLC25A18, GAS6, SCN5A, PDE2A, TPCN1, RYR1, CHRNG                                                                                                                                                                                                                                                                                                                                                                                                                                                                                                                                                                                                                                                                                                                                                                                                                                                                                                                                                                                                                                                                                                                                                                                                                                                                                                                                                                                                                                                                                                                                                                                                                                                                                                                                                                                                                                                                                                                                                                                                                                                                                                                                                                                                                                                                                                                                                                                                                                                                                                                                                                                                                                                                                                                                                                                                                                                                                                                                                                                                                                                                                                                                                                                                                                                                                                                                                                                                                                                                                                                                                                                                                                                                                                                                                                                                                                                                                                                                                                                                                                                                                             |
| GO:0048646 | anatomical structure formation involved in morphogenesis | 4.311235015 | 4.88E-05    | WNT16, TFAP2B, ADGRA2, RORA, MEF2C, LAMB1, MMP9, COBL, ENG, PDGFRB, FN1, INHBA, SIX1, PTPRB, PDGFRA, ARHGAP24, COL6A1, CASQ1, MMP14, ITGB2, PLXDC1, FZD5, HEYL, ITGA2, SYK, ANPEP, EFNA1, SIX2, SCG2, ABLIM3, CSPG4, TBX1, TNFAIP2, POU5F1                                                                                                                                                                                                                                                                                                                                                                                                                                                                                                                                                                                                                                                                                                                                                                                                                                                                                                                                                                                                                                                                                                                                                                                                                                                                                                                                                                                                                                                                                                                                                                                                                                                                                                                                                                                                                                                                                                                                                                                                                                                                                                                                                                                                                                                                                                                                                                                                                                                                                                                                                                                                                                                                                                                                                                                                                                                                                                                                                                                                                                                                                                                                                                                                                                                                                                                                                                                                                                                                                                                                                                                                                                                                                                                                                                                                                                                                                                                                                                                                                                                   |
| GO:0008150 | biological_process                                       | 3.807145528 | 0.000155903 | WNT16, CALCR, ACSM3, ABCC8, TBXA2R, SCIN, SCN4A, CACNA2D2, MYLIP, TFAP2B, NFIX, MMP25, BAZ1B, CD4, HFE, SYT7, DCN, SEMA3B, SLC7A14, CLDN11, GPRC5A, ACP, SLC38A5, ATP1A2, ADGRA2, RUNX3, EHD2, VRK2, IBSP, TNC, FAM65C, TG, ARHGEF5, LAMC3, PTGER3, CYBA, ALX4, LY75, MCOLN3, CAMK2B, TSPAN32, ATP2C2, FAR2, TLE2, BCL3, MAOB, RORA, CNGB1, EPHA8, WBSR22, MYO3B, TP63, ALPK1, PTGS2, ATP2A3, MGLL, PLXNA2, PAG1, RARB, CAPN6, SLC25A43, BRINP1, RUNX1T1, MEF2C, ATP8B1, IL12RB2, KCNK2, COL16A1, WNT11, ADAMTS2, TFAP2C, FXYD5, LAMB1, SLC17A6, GABRP, CYP26A1, DSP, KCNK6, SUSD2, PRODH, NEFH, APOL4, ASB2, SLC10A1, SLC8A3, PAPLN, MMP9, FERMT1, PLCB4, HCK, PXM4, BPI, MAP1LC3A, SRPX, MCF2, PLP2, ASB9, KLF8, NALCN, ACP5, SGC, FLT1, WDFC1, CRISPLD2, CRYM, RASL12, AP3B2, PDGFRL, CPQ, WISP1, NDRG1, TLE6, TNNT1, MET, HOXA5, HOXA6, VIPR2, ABHD11, COBL, STX1A, PCOLCE, BCL7B, TBL2, CLIP2, ECM2, ENG, PTGDS, CXCL12, PITX3, RNF43, PNPO, COL1A1, SULT1E1, CPZ, CPT1A, ELMOD1, TCIRG1, CYP27B1, TNS2, KCNA1, LTBR, OAS3, VDR, ADGRD1, TPD52L1, EYA4, TRIM38, ARFGEF3, FTEB, PRPH2, PCDHB2, PCDHB5, PCDHB6, SLC27A6, PDGFRB, PEX5L, STEAP3, POMC, EFEMP1, FN1, IL1R1, QPCT, PLCL1, PRRX1, PDC, TFAP2E, LPPR5, LPPR4, RCAN3, SLC8A2, TNNT2, SGK1, VAMP8, PCDH17, LTBP2, GPR68, BCL11A, PYROXD2, GRIA2, PCDHB14, PCDHB12, TEX11, ENOX1, DNAJC15, GLT8D2, ECHDC2, CAT, CPXM2, XPNPEP2, INHBA, ADGRE5, COL10A1, NMI, TNFAIP6, EDN3, PMPA1, IQSEC2, COL21A1, CPNE5, IRF1, NKX2-4, BMP2, PCSK2, TCF15, CFP, SIX1, HSPA2, EVI2A, OMD, BCL11B, PTPRB, ADGRE2, KLF2, TUBA4A, ZNF835, HOXD9, CGNL1, ISLR, ADCY4, CDH15, NXNL2, DPP6, SULT4A1, IDO1, RAP1GAP2, SERPIN1, ATP1A4, MYBPH, STARD13, RARRES3, GSTT2B, LYVE1, TRPM1, IAH1, ECHDC3, RERG, PDGFRA, ADAMTS8, TBX3, HTR1B, HEY2, AGT, SLC19A3, WNT10A, LMO7, GPNMB, RAPGEF5, GALNT5, MYO7A, ARHGAP20, IFI44L, IFI44, EMILIN1, STAMBPL1, CH25H, ADAMTS14, MSTN, ARHGAP24, PCDH10, RBP5, KERA, SLC46A3, GALNT6, FBLN5, DISP2, ADAMTS17, MCTP2, CDH11, GAS8, FEM1A, COL6A1, COL6A2, ADAMTS10, FCN3, BEST4, ITGA10, CASQ1, RGS16, HMCN1, CTSK, SUSD4, LEFTY2, ZNF385B, UNC80, OSBP10, SLC22A14, EPHA5, CYP4V2, ADAMTS16, HAPLN1, ARHGAP26, SLC25A48, GABRB2, DCDC2, PLA2G7, LGSN, SLC22A3, HTR2C, IGSF1, SLC26A7, LCN9, SLC5A12, ADAM33, PLCH2, CACNA2D4, CACNA1C, ANO4, EDNRA, GABRA2, ZSCAN1, IGSF10, STK32B, PLA2R1, TMPRSS11D, MCOLN2, FAM134B, LRRK1, ABCA6, MMP21, FGD5, CNTNAP5, PPARGC1B, SLC24A2, SLA, GNA14, WIF1, UNC5D, ZIC3, MMP14, CACNA1D, NBL1, FGF17, ADAMTS4, STC1, C1R, ABCG1, ITGB2, PTH1R, AZGP1, FGFR4, LY6E, COX7A1, PLXDC1, ALOX15, CXCL16, ITH3, DHRS3, BRINP3, SNED1, HAAO, CTSS, MSX1, S100A11, ARHGAP25, FZD5, COL6A3, ELF3, IGFBP7, SERPINI1, ALB, HEYL, MST1R, PITX2, PRSS12, NDST3, GUCY1A3, NPY1R, NPY5R, ITGA2, EDIL3, KLB1, ACSL6, GRIK2, TLX3, DACT2, HCN1, COL1A2, CHMP4C, SYK, AKR1E2, DACT1, VWA2, TC2N, MFAP4, ACSM1, LDHD, ANPEP, STA16, PRRX2, GPT, SOST, RAB31L1, TRANK1, ENTDP3, LTBP3, BATF2, NPNT, PARM1, AFAP1L2, EFNA1, PTAFR, NPR1, GPR183, BNC2, PCDH7, REPS2, TM4SF1, ALCAM, SLC16A5, LRRN2, MGMT, SIX2, SCDC, CYTL1, PRKCDP, HAS2, SOSTDC1, KCND3, PDE7B, PTGER4, NINJ2, SCG2, SYNPO, GPR22, COL6A5, RARG, SSH3, GXYLT2, HPSE2, ARPP21, EVC2, BNC2, ABLIM3, CSPG4, ADGRG2, TDRD12, C1QTNF1, GLIS1, GALNTL6, MYO1H, CMKLR1, ZNF135, VPS37D, SYNE3, SLC03A1, PRR15, LY6H, EPS8L2, HIC1, PCDHB9, SPATA31E1, RNF212, MSC, SLC17A8, ZNF154, TH, GPR139, MAB21L1, GREM2, PENK, ADGRB1, SLC9A9, MGAT4C, UBA7, C1S, FES, CSF1R, HS3ST4, NTM, GRID1, RGS7, SLC25A18, CAMK1D, GAS6, SYNDIG1L, OPCML, SCN5A, TBX1, ALDH1A3, PKP3, SLITRK6, TMEM173, MUC6, SGCZ, TNFAIP2, SOCS1, IFNLR1, PRKG1, NTF3, RTN4R1, GSPAP, THBS2, CYP4X1, PDE2A, TPCN1, QRFP, NPSR1, GJA4, NHLRC1, THSD4, FAM69C, DNER, OR7D2, CLEC2A, CERKL, VWC2, PRELP, HACD4, SP6, SPOCK3, TDRD7, HLA-DRB1, AKR1C3, RYR1, MME, LAMA2, CHRNG, ZFP28, PCDHB11, ADAMTS2, ZNF560, ZNF667, CHSY3, SULT1C2, TPM2, HLA-DRB5, ITGBL1, NUDT16, PAPSS2, EIF1AY, RASSF9, DUSP27, TGM2, PPAPDC1A, MAFB, POU5F1, PCDHA7, PCDHA5, CDKL4, DPP3, C21orf62, MAP10, POU5F1B, ITGA1, CAPN14, SMTNL1, COL28A1, CEBPD, APOL6, B3GNT9, ZNF737, PCDHA13, PCDHG3, LRRD1, ARHGAP8, GSTA1, RAD21L1, C4A, ACTN3, FMN1, PCDHA11, PCDHA10, PCDHGA7, EID3, CTSO, ZNF578 |
| GO:0000902 | cell morphogenesis                                       | 3.69951756  | 0.000199748 | SEMA3B, EPHA8, PLXNA2, MEF2C, LAMB1, NEFH, MMP9, MET, COBL, VDR, FN1, LPPR4, BMP2, HSPA2, HEY2, COL6A1, COL6A2, ITGA10, EPHA5, CACNA1C, UNC5D, CACNA1D, NBL1, STC1, MSX1, COL6A3, HEYL, ITGA2, DACT2, EFNA1, ALCAM, SIX2, HAS2, ABLIM3, ADGRB1, FES, SCN5A, NTF3, ITGA1                                                                                                                                                                                                                                                                                                                                                                                                                                                                                                                                                                                                                                                                                                                                                                                                                                                                                                                                                                                                                                                                                                                                                                                                                                                                                                                                                                                                                                                                                                                                                                                                                                                                                                                                                                                                                                                                                                                                                                                                                                                                                                                                                                                                                                                                                                                                                                                                                                                                                                                                                                                                                                                                                                                                                                                                                                                                                                                                                                                                                                                                                                                                                                                                                                                                                                                                                                                                                                                                                                                                                                                                                                                                                                                                                                                                                                                                                                                                                                                                                      |
| GO:0007165 | signal transduction                                      | 3.52781714  | 0.000296608 | WNT16, CALCR, ABCC8, TBXA2R, CD4, GPRC5A, ATP1A2, ADGRA2, VRK2, TG, ARHGEF5, PTGER3, CYBA, CAMK2B, TLE2, BCL3, RORA, CNGB1, EPHA8, TP63, PLXNA2, PAG1, RARB, MEF2C, IL12RB2, COL16A1, WNT11, GABRP, PRODH, ASB2, MMP9, PLCB4, HCK, MCF2, PLP2, ASB9, FLT1, RASL12, PDGFRL, WISP1, NDRG1, MET, VIPR2, ENG, CXCL12, RNF43, CPZ, TCIRG1, TNS2, KCNA1, LTBR, OAS3, VDR, ADGRD1, TRIM38, PDGFRB, POMC, EFEMP1, IL1R1, PLCL1, PDC, RCAN3, LTBP2, GPR68, GRIA2, INHBA, ADGRE5, NMI, TNFAIP6, EDN3, PMPA1, IRF1, BMP2, EVI2A, ADGRE2, ADCY4, STARD13, TRPM1, RERG, PDGFRA, HTR1B, HEY2, AGT, WNT10A, RAPGEF5, ARHGAP20, MSTN, ARHGAP24, FBLN5, DISP2, MCTP2, ITGA10, CASQ1, CTSK, LEFTY2, ZNF385B, EPHA5, ARHGAP26, GABRB2, DCDC2, HTR2C, IGSF1, PLCH2, CACNA1C, EDNRA, GABRA2, LRRK1, PPARGC1B, GNA14, WIF1, UNC5D, CACNA1D, FGF17, ITGB2, PTH1R, FGFR4, LY6E, DHRS3, CTSS, S100A11, ARHGAP25, FZD5, HEYL, MST1R, GUCY1A3, NPY1R, NPY5R, ITGA2, GRIK2, COL1A2, SYK, DACT1, STA16, SOST, EFNA1, PTAFR, NPR1, GPR183, REPS2, ALCAM, LRRN2, CYTL1, SOSTDC1, PDE7B, PTGER4, SCG2, GPR22, RARG, CSPG4, ADGRG2, CMKLR1, EPS8L2, HIC1, GPR139, GREM2, PENK, ADGRB1, UBA7, FES, CSF1R, GRID1, RGS7, GAS6, TBX1, SOCS1, IFNLR1, PRKG1, NTF3, PDE2A, QRFP, NPSR1, DNER, OR7D2, CERKL, SPOCK3, HLA-DRB1, AKR1C3, CHRNG, HLA-DRB5, RASSF9, PPAPDC1A, POU5F1, ITGA1, LRRD1, ARHGAP8                                                                                                                                                                                                                                                                                                                                                                                                                                                                                                                                                                                                                                                                                                                                                                                                                                                                                                                                                                                                                                                                                                                                                                                                                                                                                                                                                                                                                                                                                                                                                                                                                                                                                                                                                                                                                                                                                                                                                                                                                                                                                                                                                                                                                                                                                                                                                                                                                                                                                                                                                                                                                                                                                                                                                                                                                                                                                                                              |
| GO:0048870 | cell motility                                            | 3.466945158 | 0.000341236 | ADGRA2, EPHA8, MEF2C, LAMB1, MMP9, FERMT1, HCK, FLT1, ENG, CXCL12, COL1A1, PDGFRB, FN1, EDN3, SIX1, ADGRE2, ATP1A4, PDGFRA, GAS8, DCDC2, ITGB2, FGFR4, PITX2, ITGA2, COL1A2, SYK, EFNA1, SIX2, SCG2, FES, GAS6, TBX1, DNER                                                                                                                                                                                                                                                                                                                                                                                                                                                                                                                                                                                                                                                                                                                                                                                                                                                                                                                                                                                                                                                                                                                                                                                                                                                                                                                                                                                                                                                                                                                                                                                                                                                                                                                                                                                                                                                                                                                                                                                                                                                                                                                                                                                                                                                                                                                                                                                                                                                                                                                                                                                                                                                                                                                                                                                                                                                                                                                                                                                                                                                                                                                                                                                                                                                                                                                                                                                                                                                                                                                                                                                                                                                                                                                                                                                                                                                                                                                                                                                                                                                                   |
| GO:0008233 | peptidase activity                                       | 2.910578885 | 0.00122863  | MMP25, CAPN6, ADAMTS2, PAPLN, MMP9, CPQ, CPZ, CPXM2, XPNPEP2, PCSK2, DPP6, ADAMTS8, STAMBPL1, ADAMTS14, ADAMTS17, ADAMTS10, CTSK, ADAMTS16, ADAM33, TMPRSS11D, MMP21, MMP14, ADAMTS4, C1R, CTSS, PRSS12, KLB1, ANPEP, C1S, THSD4, MME, ADAMTSL2, NUDT16, CAPN14, CTSO                                                                                                                                                                                                                                                                                                                                                                                                                                                                                                                                                                                                                                                                                                                                                                                                                                                                                                                                                                                                                                                                                                                                                                                                                                                                                                                                                                                                                                                                                                                                                                                                                                                                                                                                                                                                                                                                                                                                                                                                                                                                                                                                                                                                                                                                                                                                                                                                                                                                                                                                                                                                                                                                                                                                                                                                                                                                                                                                                                                                                                                                                                                                                                                                                                                                                                                                                                                                                                                                                                                                                                                                                                                                                                                                                                                                                                                                                                                                                                                                                        |
| GO:0043167 | ion binding                                              | 2.667504984 | 0.00215028  | ACSM3, ABCC8, SCIN, CACNA2D2, MYLIP, MMP25, BAZ1B, CD4, SYT7, ATP1A2, RUNX3, EHD2, VRK2, ARHGEF5, CYBA, ENTDP2, CAMK2B, ATP2C2, MAOB, RORA, CNGB1, EPHA8, MYO3B, TP63, ALPK1, PTGS2, ATP2A3, RARB, RUNX1T1, ATP8B1, ADAMTS2, CYP26A1, PRODH, PAPLN, MMP9, PLCB4, HCK, MAP1LC3A, KLF8, ACP5, FLT1, RASL12, CPQ, WISP1, MET, PCOLCE, PTGDS, RNF43, PNPO, COL1A1, CPZ, CYP27B1, TNS2, OAS3, VDR, EYA4, TRIM38, PCDHB2,                                                                                                                                                                                                                                                                                                                                                                                                                                                                                                                                                                                                                                                                                                                                                                                                                                                                                                                                                                                                                                                                                                                                                                                                                                                                                                                                                                                                                                                                                                                                                                                                                                                                                                                                                                                                                                                                                                                                                                                                                                                                                                                                                                                                                                                                                                                                                                                                                                                                                                                                                                                                                                                                                                                                                                                                                                                                                                                                                                                                                                                                                                                                                                                                                                                                                                                                                                                                                                                                                                                                                                                                                                                                                                                                                                                                                                                                          |

|            |                                                    |             |            |                                                                                                                                                                                                                                                                                                                                                                                                                                                                                                                                                                                                                                                                                                                                                                                                                                                                                                                                                                                                                                                                                                                                                                                                                                                                                            |
|------------|----------------------------------------------------|-------------|------------|--------------------------------------------------------------------------------------------------------------------------------------------------------------------------------------------------------------------------------------------------------------------------------------------------------------------------------------------------------------------------------------------------------------------------------------------------------------------------------------------------------------------------------------------------------------------------------------------------------------------------------------------------------------------------------------------------------------------------------------------------------------------------------------------------------------------------------------------------------------------------------------------------------------------------------------------------------------------------------------------------------------------------------------------------------------------------------------------------------------------------------------------------------------------------------------------------------------------------------------------------------------------------------------------|
|            |                                                    |             |            | PCDHB5,PCDHB6,PDGFRB,STEAP3,EFEMP1, FN1, QPCT, PLCL1, SGK1, PCDH17,LTBP2, BCL11A,PCDHB14,PCDHB12, CAT, CPXM2, XPNPEP2, ADGRE5, COL10A1, HSPA2, BCL11B, ADGRE2, KLF2, TUBA4A, ZNF835, ADCY4, CDH15, FIBCD1, IDO1, ATP1A4, RERG, PDGFRA, ADAMTS8, DYSF, LMO7, GALNT5, MYO7A, STAMBPL1, CH25H, OIT3, ADAMTS14, MSTN, PCDH10, GALNT6, FBLN5, ADAMTS17, MCTP2, CDH11, ADAMTS10, ITGA10, CASQ1, HMCN1, ZNF385B, EPHA5, CYP4V2, ADAMTS16, ARHGAP26, PLA2G7, HTR2C, ADAM33, PLCH2, CACNA2D4, CACNA1C, ZSCAN1, STK32B, LRRK1, ABCA6, MMP21, FGD5, GNA14, ZIC3, MMP14, CACNA1D, RNF207, ADAMTS4, C1R, ABCG1, ITGB2, FGFR4, ALOX15, SNEED1, HAAO, SI00A11, ALB, MST1R, GUCY1A3, ITGA2, EDIL3, KLKB1, ACSL6, HCN1, COL1A2, SYK, VWA2, ACSM1, LDHD, ANPEP, GPT, SOST, TRANK1, ENTPD3, LTBP3, NPNT, FSTL5, PTAFR, NPR1, BNC1, PCDH7, REPS2, KCND3, PDE7B, CALB2, RARG, SH3RF3, HPSE2, BNC2, ABLIM3, TDRD12, GLIS1, GALNTL6, MYO1H, ZNF135, HIC1, PCDHB9, RNF212, ZNF154, TH, GREM2, MGAT4C, UBA7, C1S, FES, CSF1R, CAMK1D, GAS6, TMEM173, PRKG1, THBS2, CYP4X1, PDE2A, NHLRC1, ZNF385C, DNER, SP6, SPOCK3, MME, ZFP28, PCDHB11, ADAMTS2, ZNF560, ZNF667, CHSY3, NUDT16, PAPS2, TGM2, SP5, PCDHA7, PCDHA5, CDKL4, DPF3, ITGA1, CAPN14, ZNF737, PCDHA13, PCDHGC3, ACTN3, PCDHA11, PCDHA10, PCDHGA7, ZNF578 |
| GO:0006810 | transport                                          | 2.359687543 | 0.0043683  | CALCR, ABCC8, SCIN, SCN4A, CACNA2D2, HFE, SYT7, SLC7A14, SLC38A5, ATP1A2, EHD2, VRK2, LY75, MCOLN3, ATP2C2, BCL3, CNGB1, ATP2A3, RARB, SLC25A43, ATP8B1, KCNK2, FXD5, LAMB1, SLC17A6, GABRP, KCNK6, SUSD2, APOL4, SLC10A1, SLC8A3, HCK, PLP2, NALCN, CRYM, RASL12, AP3B2, ABHD11, STX1A, CLIP2, PTGDS, COL1A1, CPT1A, ELMOD1, TCIRG1, CYP27B1, KCNA1, ARFGEF3, SLC27A6, PEX5L, STEAP3, FN1, SLC8A2, SGK1, VAMP8, LTBP2, GRIA2, DNAJC15, INHBA, EDN3, TUBA4A, ADCY4, ATP1A4, LYVE1, TRPM1, RERG, ADAMTS8, TBX3, SLC19A3, RBP5, SLC46A3, FBLN5, FCN3, BEST4, CASQ1, LEFTY2, UNC80, OSBP10, SLC22A14, SLC25A48, GABRB2, SLC22A3, HTR2C, SLC26A7, LCN9, SLC5A12, CACNA2D4, CACNA1C, ANO4, EDNRA, GABRA2, PLA2R1, MCOLN2, ABCA6, SLC24A2, CACNA1D, ABCG1, AZGP1, COX7A1, ALOX15, CXCL16, ALB, PRSS12, GRIK2, HCN1, COL1A2, CHMP4C, SYK, RAB31L1, NPR1, SLC16A5, HAS2, KCND3, SCG2, RARG, VPS37D, SLC30A1, SLC17A8, SLC9A9, FES, GRID1, SLC25A18, GAS6, SCN5A, TNFAIP2, PDE2A, TPCN1, GJA4, DNER, AKR1C3, RYR1, LAMA2, CHRNG, RASSF9, TGM2, PPAPDC1A, APOL6                                                                                                                                                                                                                                      |
| GO:0006790 | sulfur compound metabolic process                  | 2.351317072 | 0.00445331 | DCN, ACPP, FAR2, SULT1E1, OMD, SULT4A1, GSTT2B, SLC19A3, KERA, NDST3, ACSL6, CSPG4, HS3ST4, PRELP, CHSY3, SULT1C2, PAPS2, GSTA1                                                                                                                                                                                                                                                                                                                                                                                                                                                                                                                                                                                                                                                                                                                                                                                                                                                                                                                                                                                                                                                                                                                                                            |
| GO:0008289 | lipid binding                                      | 1.791437724 | 0.0161645  | SCIN, SYT7, ATP1A2, RORA, CYP26A1, APOL4, BPI, MAP1LC3A, PTGDS, SULT1E1, VDR, SGK1, STARD13, DYSF, RBP5, OSBP10, ARHGAP26, PLA2G7, ABCG1, ALOX15, ALB, PTAFR, GPR183, FES, GAS6, APOL6                                                                                                                                                                                                                                                                                                                                                                                                                                                                                                                                                                                                                                                                                                                                                                                                                                                                                                                                                                                                                                                                                                     |
| GO:0001071 | nucleic acid binding transcription factor activity | 1.63055963  | 0.0234121  | TFAP2B, NFIX, RUNX3, PTGER3, RORA, TP63, RARB, RUNX1T1, MEF2C, TFAP2C, HOXA5, HOXA6, PITX3, VDR, TFEB, TFAP2E, BCL11A, IRF1, TCF15, SIX1, ZNF835, HOXD9, TBX3, HEY2, ZSCAN1, ZIC3, ELF3, HEYL, PITX2, STAT6, PRRX2, BATF2, BNC1, RARG, ZNF135, HIC1, MSC, ZNF154, TBX1, ZFP28, MAFB, POU5F1, POU5F1B, CEBPD                                                                                                                                                                                                                                                                                                                                                                                                                                                                                                                                                                                                                                                                                                                                                                                                                                                                                                                                                                                |
| GO:0042592 | homeostatic process                                | 1.566350154 | 0.0271425  | CALCR, ACSM3, TFAP2B, HFE, ATP1A2, RORA, CNGB1, TP63, MEF2C, CXCL12, TCIRG1, CYP27B1, KCNA1, STEAP3, INHBA, ADCY4, NXNL2, ATP1A4, TRPM1, PDGFRA, HTR2C, CACNA1C, EDNRA, STC1, ABCG1, AZGP1, FGFR4, HAAO, ALB, ACSM1, HAS2, C1QTNF1, SLC9A9, GAS6, MUC6, SGCZ, RYR1, TGM2                                                                                                                                                                                                                                                                                                                                                                                                                                                                                                                                                                                                                                                                                                                                                                                                                                                                                                                                                                                                                   |
| GO:0004871 | signal transducer activity                         | 1.488939236 | 0.0324385  | CALCR, ABCC8, TBXA2R, CD4, GPRC5A, ADGRA2, PTGER3, RORA, EPHA8, PLXNA2, RARB, IL12RB2, GABRP, PLCB4, FLT1, PDGFRL, MET, VIPR2, ENG, RNF43, VDR, ADGRD1, TRIM38, PDGFRB, EFEMP1, IL1R1, PLCL1, GPR68, GRIA2, ADGRE5, EVI2A, PTPRB, ADGRE2, PDGFRA, HTR1B, FBLN5, EPHA5, GABRB2, HTR2C, PLCH2, EDNRA, GABRA2, GNA14, ITGB2, PTH1R, FGFR4, FZD5, MST1R, NPY1R, NPY5R, ITGA2, GRIK2, STAT6, PTAFR, NPR1, GPR183, PTGER4, GPR22, RARG, CSPG4, ADGRG2, CMKLR1, GPR139, ADGRB1, CSF1R, GRID1, RGS7, IFNLR1, QRFPR, NPSR1, DNER, OR7D2, HLA-DRB1, CHRNG                                                                                                                                                                                                                                                                                                                                                                                                                                                                                                                                                                                                                                                                                                                                            |
| GO:0006950 | response to stress                                 | 1.366533564 | 0.0429998  | WNT16, TBXA2R, MMP25, BAZ1B, CD4, EHD2, VRK2, TNC, CYBA, LY75, CAMK2B, BCL3, RORA, TP63, PTGS2, ATP2A3, MGLL, MEF2C, PRODH, SLC8A3, HCK, BPI, MAP1LC3A, CPQ, NDRG1, ENG, COL1A1, TCIRG1, CYP27B1, OAS3, EYA4, TRIM38, PDGFRB, FN1, SLC8A2, SGK1, VAMP8, GPR68, CAT, INHBA, ADGRE5, NMI, TNFAIP6, IRF1, BMP2, CFP, HSPA2, ADGRE2, KLF2, TUBA4A, ADCY4, LYVE1, PDGFRA, TBX3, IFI44L, FBLN5, FCN3, ITGA10, CTSK, LEFTY2, DCCDC2, HTR2C, PLA2R1, GNA14, FGF17, C1R, ITGB2, FGFR4, ALOX15, CXCL16, CTSS, ELF3, ALB, MST1R, GUCY1A3, ITGA2, KLKB1, COL1A2, SYK, STAT6, BATF2, AFAP1L2, PTAFR, MGMT, HAS2, PTGER4, NINJ2, SCG2, HIC1, TH, UBA7, C1S, FES, CSF1R, CAMK1D, GAS6, TMEM173, SOCS1, IFNLR1, PRKG1, RTN4RL1, PDE2A, CLEC2A, HLA-DRB1, AKR1C3, RYR1, HLA-DRB5, PPAPDC1A, POU5F1, ITGA1, C4A, EID3                                                                                                                                                                                                                                                                                                                                                                                                                                                                                        |



**Supplementary Table 11. Probes for quantitative PCR (WS deletion).**

| Probe name       | Forward Primer Seq. (5'-3')       | Reverse Primer Seq. (5'-3') | Reporter probe Seq. |
|------------------|-----------------------------------|-----------------------------|---------------------|
| CALN1-ANY        | GGTTTAAGTCCAGACTCAGGTCAT          | CTCAGGGAAACTGCTAGATTTAGGT   | CAACGTGCAAAACTG     |
| NSUN5ex2-1-487AF | TCACTCCCCACCCCTACTAC              | TGTACTIONCAGCAACTCCAGGTA    | TCGCGCCCAGGTCC      |
| NSUN5ex8-5-767A  | CAGGTCAAAGGCAAAGATCTTCCTA         | GGCCCTTAGCTGCTCCAT          | CCCCTGCTTTGCC       |
| TRIM50ex7-ANYR   | GTAGAGCTTGCCCTGGAAGTC             | CGACCGCCCGATGAC             | CCGCTCTACACCTTCC    |
| FKBP6-ANY        | GGGTACAGGGAAGTGCTTGAG             | GCGGTGGGTGTCGTGT            | CCAGCCCTGCCTCGCA    |
| FZD9-ANY         | CTGCTGCCCCCTCCTT                  | GCTGCTAGTCAGCTGTCTCTAG      | CCAGCCCTGCC         |
| BAZ1B-3-ANY      | TCCTCATCACCAGAGACTGTGT            | ATGACAGCATTGACTACCGATTCA    | CATCACTGCAAAGACC    |
| BCL7B-ANY        | GCCTTCCACATCTCTCTTCTC             | ACCTCCAGGCAGCAGTCT          | TCCGTCCAGAGATTCT    |
| WBSR22           | CCAGGACGGATGATGTCAAGAG            | AGGCAACGGAGCAATCCA          | CCCCAACCCTTCAAGC    |
| ELN-ANY          | GATCCATGCAGAGGAAATGTCAAC          | GGAAGTGACAGTTGGTCCTGAAT     | CACCTGCAATCCTGC     |
| LIMK1-ANY        | GGGAGCAGAGGGAGTTCCT               | GCAGCTGTGCAGAGGGA           | CCCCAGCCCATCCTG     |
| EIF4H-ANY        | TGACCTGGGTGGTTTTGTGT              | ACACTACATGTGGCTTCAGATTCTG   | TCGGTGGCACTCTTAC    |
| LAT2-ANY         | CCAGCCAGTCCAGCTAACC               | CCTGTGTGGTTCAAGGTCTCT       | CTGCACCCAGGCATC     |
| RFC2-ANY         | Hs00945948_m1 (Life Technologies) |                             |                     |
| CLIP2-ANY        | GGAGGCCAGGACCAG                   | CGGTACTIONCACGTCCAGTTTT     | CAGCTCGGCATCCCG     |
| GTF2IRD1         | CAACCTAGCCTGCAGTTCCA              | CTGGGCTCTTTAAGGCTGTGA       | CTCCCCAGAACTCC      |
| GTF2I-ex7        | GGTAACAGATGCTGACAGGTCAAT          | CAGCAGTAATGAAATTAGGTTTTAC   | CTTCCACCTGGAGATAGT  |
| GTF2I-ex12       | ATTCTACTCAACATGTCCCTT             | TTCAATAGTCACCTCAACTTCA      | CAGAAACAAGTGAGGACCC |
| GTF2I-ex18       | CCAAGGCTGTACCGTACCAAAA            | TCTGGCAGTCCTTCCACGTA        | CACACCCGAATGATCT    |
| WBSR16-ANY       | AAGGTCATCTCTTTAGGCCACAAAA         | GTTGAACCCTCAGGCAAAAGG       | AAGCACCTGGCATTG     |

**Supplementary Table 12. Primers for quantitative PCR (characterization of iPSCs, NPCs and neurons).**

| Gene Symbol   | Forward Primer          | Reverse Primer         |
|---------------|-------------------------|------------------------|
| <i>GAPDH</i>  | CATGAGAAGTATGACAACAGCCT | AGTCCTTCCACGATACCAAAGT |
| <i>TBP</i>    | TGCACAGGAGCCAAGAGTGAA   | CACATCACAGCTCCCCACCA   |
| <i>LIN28</i>  | AGCGCAGATCAAAAGGA       | CCTCTCGAAAGTAGGTTGG    |
| <i>PAX6</i>   | TGTCCAACGGATGTGTGAGTA   | CAGTCTCGTAATACCTGCCCA  |
| <i>MSX1</i>   | CTCCGCAAACACAAGACGAAC   | CACATGGGCCGTGTAGAGTC   |
| <i>AFP</i>    | CGCGTTTCTGGTTGCTTACAC   | ACTTCTTGCTCTTGGCCTTGG  |
| <i>OCT4</i>   | GGGAGGGGAGGAGCTAGG      | TCCAACCAGTTGCCCCAAC    |
| <i>NESTIN</i> | CTGCTACCCTTGAGACACCTG   | GGGCTCTGATCTCTGCATCTAC |
| <i>MAP2</i>   | CTCAGCACCGCTAACAGAGG    | CATTGGCGCTTCGGACAAG    |
| <i>NEUN</i>   | CCAAGCGGCTACACGTCTC     | CGTCCCATTACGCTTCTCCC   |
| <i>CTIP2</i>  | GGTGCCCTGCTATGACAAGG    | GGCTCGGACACTTTCCTGAG   |
| <i>SATB2</i>  | CCTCCTCCGACTGAAGACAG    | TGGTCTGGGTACAGGCCTAC   |
| <i>CHAT</i>   | CAGCCCTGCCGTGATCTTT     | TGTAGCTGAGTACAGCAGAGA  |
| <i>SYNI</i>   | AGTTCTTCGGAATGGGGTGAA   | CAAACCTGCGGTAGTCTCCGTT |
| <i>ABAT</i>   | AAGAGAGCCGAGGCAATTACC   | GCTCGCATTTTGAGGCTGTTG  |

**Supplementary Table 13. DELTAGene Assay. Oligonucleotides are shown 5'-3'.**

| Target    | Forward Primer         | Reverse Primer         | Design RefSeq  |
|-----------|------------------------|------------------------|----------------|
| ABAT      | GACTACAGCATCCTCTCCTTCA | TTAGAGTGCCTGGTCGCTAA   | NM_000663.4    |
| ACHE      | CCCAGAGGCCCTCATCAAC    | ATACGAGCCCTCATCCTTCAC  | NM_015831.2    |
| ADARB1    | CTCCAATGCGAGCATCCAAA   | GATGCCACCACGTTCC       | NM_015833.3    |
| ASCL1     | TGGTGCGAATGGACTTTGGAA  | CTCCCAACGCCACTGACAA    | NM_004316.3    |
| B2M       | TTAGCTGTGCTCGCGCTAC    | CTCTGCTGGATGACGTGAGTAA | NM_004048.2    |
| B3GAT1    | TCGAGAACTTGTACCCTCA    | CCCTTCTTGCCCTCATTAC    | NM_018644.3    |
| BCL11B    | CAACCCGAGCACTTGTCT     | CCTCGTCTTCTCGAGGATGG   | NM_138576.2    |
| CA2       | TGTGCTCAAGGAACCCATCA   | TTCACCCTCCCATTGAAGTTA  | NM_000067.2    |
| CDH2      | GCCAACCTTAAGTGGAGTCA   | TGGCCACTGTGCTTACTGAA   | NM_001792.3    |
| CHAT      | CCGTTTGTCTCTCCACTA     | ATTTGGGACCACAGGACCATA  | NM_001142929.1 |
| CHRM1     | ACCCTACAGACCCTCTTCA    | TTCCTCCAGGCAGCTAC      | NM_000738.2    |
| COMT      | GTCTTCTCGACCACTGGAA    | AGTAGCACTGTCCCCTTCC    | NM_000754.3    |
| CUX2      | TCCATCACCAAGAGGGTGAA   | CAGGATGCTTCCCAAACA     | NM_015267.3    |
| DBH       | GAGTGGGAGATCGTGAACCA   | ACCGACACGACCTTCTTCAA   | NM_000787.3    |
| DCX       | ATCTCTACGCCACCAGTCC    | AGCGAGTCCGAGTCATCCAA   | NM_000555.3    |
| DLG4      | AGCTGGAGCAGGAGTTCAC    | ACACGCTTACCTTGTGGTA    | NM_001365.3    |
| DRD1      | AGTCCACATTCCAAGCTCCA   | CTCCTCAGCAGCTCTCCAA    | NM_000794.3    |
| DRD2      | CCTGAACCTTGTGTCATCA    | GAGCTGTAGCGCTATTGTA    | NM_000795.3    |
| DRD3      | CCTCGGTCTCCAGAAATCAGAA | GCTGGCTCAGAGATGCCATA   | NM_000796.3    |
| EFNB1     | ATGGGCCTGGAGTTCAAGAA   | GGTTTTCCAGCCCCTCCA     | NM_004429.4    |
| EOMES     | CTGTGGCAAAGCCGACAATA   | CTCATCCAGTGGGAACCAGTA  | NM_005442.2    |
| ETV1      | AGCCGTTCACTCCGCTATTA   | AAGGGCTTCTGGATCACACA   | NM_001163149.1 |
| FABP7     | GCTACCTGGAAGCTGACCAA   | CCACCTGCCTAGTGGCAA     | NM_001446.3    |
| FOXG1*    | GCCAGCAGCACTTTGAGTTA   | TGAGTCAACACGGAGCTGTA   | NM_005249.3    |
| FOXP1     | GCCTACTGCACACCTCTCA    | CCCATGGAAGCGGTAGTGATA  | NM_032682.4    |
| FOXP2     | AGGGACTCATCTCCATTCCA   | GCTGAATCTCAGCAGGACTTA  | NM_014491.3    |
| GABRR1    | GCCTGATGGGAAAGTGCTCTA  | TCCAAGGGAAATCGGCTGAA   | NM_002042.3    |
| GAD1      | ATCCTGGTTGACTGCAGAGAC  | CCAGTGGAGAGCTGGTTGAA   | NM_000817.2    |
| GAD2      | CTGCTCCAAAGTGGATGTCAAC | AAAGTGGGCCTTCTCCATCA   | NM_000818.2    |
| GAPDH     | GAACGGGAAGCTTGTATCAA   | ATCGCCCACTTGATTTTGG    | NM_002046.4    |
| GFAP      | GCCAGTTGCAGTCCTTGAC    | GCGCATCTGCCTCTCCA      | NM_002055.3    |
| GRIA1     | CGCTCCACGTGATTGAAATGAA | TGGCTGCAGGGACAACTTA    | NM_000827.3    |
| GRIA2     | TGGAATGGGATGTTGGAGAA   | CACCTTCTCTCACAAGGGTA   | NM_001083619.1 |
| GRIK1     | GGGCGTTAGAGATGGATCAA   | TCATGAAAGCCACATCTTCTCA | NM_175611.2    |
| GRIK2     | AGGATGATGCCAATGGACAA   | GGTAATAGCCAGTGGAGCAA   | NM_001166247.1 |
| GRIN1     | GGCAACACCAACATCTGGAA   | CCATCCGCATACTGGAAGAC   | NM_021569.3    |
| GRIN2A    | GACCGCCTCAGTGACAA      | AGGCACTGTCCAAATCGAA    | NM_000833.3    |
| HIST1H1A* | GAGCCTGGTAAGCAAGGGAA   | CGCCTTCTTGTGAGCTTGAA   | NM_005325.3    |
| HOMER1    | CCAGCAAGCATGCAGTTAC    | TGTTTTGGGGTGGTACTATTTA | NM_004272.4    |
| HTR1A*    | AAGACGCTGGGCATCATCA    | TCGAGAAGGGCAGAACA      | NM_000524.3    |
| HTR2A     | AGCCGCTTCAACTCCAGAA    | CCTGTAGCCCAAAGACTGGTA  | NM_000621.3    |
| HTR3A     | ATGAGAAGAATCAGGTGCTGAC | TCAGGGTTCCTGAGAGAAA    | NM_213621.3    |
| KCNA1     | GCCAGGGCACTGCAAAGAC    | ACCAGGGCGATCGATGCA     | NM_000217.2    |
| MAOA      | ATGGTCTCGGGAAGGTGAC    | GGTATTTCTACCGCTGGAAC   | NM_001270458.1 |
| MAP2      | CAACGGAGAGCTGACCTCA    | CTACAGCCTCAGCAGTACTA   | NM_001039538.1 |
| MAPT      | AGATTGGGTCCCTGGACAAT   | GAAGGTCAGCTTGTGGGTTT   | NM_001123066.3 |
| MBP*      | GAGCTCCAGACCATCCAAGAA  | GGGAGGGTCTTCTGTGAC     | NM_001025090.1 |
| MECP2     | GGACACGGAAGCTTAAGCAA   | AGGGATGTGTCGCCTACC     | NM_001110792.1 |
| NEFL      | ACGTGAAGATGGCTTTGGATA  | TAGGCAGATCGGCCAAAGAC   | NM_006158.3    |
| NES       | GCTGCGGGCTACTGAAAA     | CTGAGCGATCTGGCTCTGTA   | NM_006617.1    |

|                 |                        |                        |                |
|-----------------|------------------------|------------------------|----------------|
| <i>NEUROG1*</i> | CGACACCAAGCTCACCAAAA   | CCAGAGCCCAGATGTAGTTGTA | NM_006161.2    |
| <i>NEUROG2</i>  | ACAGGCCAAAGTCACAGCAA   | CCAAGGTCTCGGATTTGACGAA | NM_024019.2    |
| <i>NEUROG3</i>  | CGCTGCTCATCGCTCTCTA    | CTCCGTCTCACGGGTCAC     | NM_020999.3    |
| <i>OLIG2</i>    | CGGAGCGAGCTCCTCAA      | ATGGCCCCAGGGGAAGATA    | NM_005806.2    |
| <i>OTX1</i>     | GACCTCTGCACCCATCC      | CAGCTGTGAACGCGTGAA     | NM_014562.2    |
| <i>OTX2</i>     | AGGAGGTGGCACTGAAAATCA  | CTGTTGTTGGCGGCACCTA    | NM_021728.2    |
| <i>P2RX2</i>    | TATTACCAGGGGCCCTCCAA   | GTGAAATTTGGGGCCATCGTAC | NM_016318.2    |
| <i>P2RX4</i>    | CACAACGTATCTCCTGGCTACA | ATGTGCAAGCGGATGCCATA   | NM_001256796.1 |
| <i>P2RX6</i>    | GGTGACCAACTCCTTGTGAC   | CTCGTCGACCCAGCAGTTA    | NM_001159554.1 |
| <i>P2RX7</i>    | CTTCGGGATCCGTTTTGACA   | TTGAGCCGATGTACACAACC   | NM_002562.5    |
| <i>P2RY2*</i>   | ATCTTCTTGTGCCGCCTCA    | CGCATAAGTGCATCAGACAC   | NM_002564.2    |
| <i>PAX6</i>     | CCCCACATATGCAGACACACA  | GAAGTGCACACCAGGGGAAA   | NM_001604.5    |
| <i>PAX7</i>     | ACAGCATCGACGGCATCC     | CAGTTCCGACTCCACATCC    | NM_013945.2    |
| <i>PGK1</i>     | GTGGAATGGCTTTTACCTTCC  | CTTGGCTCCCTCTTCATCAA   | NM_000291.3    |
| <i>PHOX2A</i>   | GCACCTGGCGCCCTAC       | TGGCTCTGGAAGAAGTTGTA   | NM_005169.3    |
| <i>POU5F1*</i>  | GGTATTCAGCCAAACGACCAT  | CCGCAGCTTACACATGTTCT   | NM_002701.4    |
| <i>RBFOX3</i>   | GAAGACGGGAACCCCTACA    | GCATAGAATTCAGGCCGTAGAC | NM_001082575.1 |
| <i>RELN</i>     | TCCAGAATTGGAAGCGGATCA  | GTTGGCCTGAATCCATCTGAAC | NM_173054.2    |
| <i>RPL13A</i>   | GAGGCCCTACCACTTCC      | GCCGTCAAACACCTTGAGAC   | NM_012423.3    |
| <i>RPL22</i>    | TTCGCTCACCTCCCTTCTA    | CCCCTTACCACAAGCTTT     | NM_000983.3    |
| <i>RPL27</i>    | GCAAGTTCATGAAACCTGGGAA | CCACCAGAGCATGGCTGTA    | NM_000988.3    |
| <i>S100B</i>    | GGAGACAAGCACAAGCTGAA   | CCATGACTTTGTCCACAACC   | NM_006272.2    |
| <i>SATB2</i>    | TTTGCCAAAGTGGCTGCAAA   | TTTCTGGGCTTGGGTTCTCC   | NM_001172517.1 |
| <i>SCN1A</i>    | TCGCTTCTCCATTGAAGGGAAC | AGCCACGGATGCTCAACAAA   | NM_006920.4    |
| <i>SCN2A</i>    | TGTGGTGGTCATTCTCTCCA   | AACAGGGTAGGGGACACAAA   | NM_001040142.1 |
| <i>SCN3A</i>    | CTTTGTTGGTGGTATTCTCTCC | GGAACAAGGTAGGGGACACA   | NM_006922.3    |
| <i>SLC17A6</i>  | TGGGGCTACATCATCACTCA   | GAAGTATGGCAGCTCCGAAA   | NM_020346.2    |
| <i>SLC17A7</i>  | GCCATCTCCTTCTGGTCTCA   | GGCTATGTCCAGGTGGTTCAC  | NM_020309.3    |
| <i>SLC18A3*</i> | GGGTGCTGTTTGCTTCCAA    | TAGCTCATGCGGTGATGAA    | NM_003055.2    |
| <i>SLC1A1</i>   | TGCGGATGCTGAAACTCA     | TGGAATCCAGTGCAGCAA     | NM_004170.5    |
| <i>SLC1A3*</i>  | GGCCAAGAAGAAAGTGCAGAA  | CTGTGAGCAGCACAAAAGCA   | NM_004172.4    |
| <i>SLC32A1</i>  | AGGCTGGAACGTGACCAAC    | GAGAAACAACCCAGGTAGCC   | NM_080552.2    |
| <i>SLC5A7</i>   | GCCATCCAGCCATACTCA     | CTTGGGATCTGGAAGCCATA   | NM_021815.2    |
| <i>SLC6A1</i>   | TCGGGAGCTACAACCTTTCC   | GAACATGCTGGTGCACGAA    | NM_003042.3    |
| <i>SLC6A3</i>   | TTCCCCTACCTGTGCTACAAAA | GAAAAGTGGCATCCAGCAA    | NM_001044.4    |
| <i>SLC6A4</i>   | TGCTGGCTTTTGCTAGCTAC   | GAAGCTCGTCATGCAGTTCA   | NM_001045.4    |
| <i>SNAP25</i>   | ATCAGTGGCGGCTTCATCC    | CACCTGCTCTAGGTTTTATCCA | NM_003081.2    |
| <i>SNAPIN</i>   | CGACGCGTTGTCTTGTTAA    | CCTTGGCAACACTGTGGTTTA  | NM_012437.5    |
| <i>SOX1*</i>    | GGGTCAAACGGCCCATGAA    | TTGTGCATCTTGGGTTCTCC   | NM_005986.2    |
| <i>SOX10</i>    | TCGCGGACCAGTACCC       | GCGCTTGTCACTTTCGTTCA   | NM_006941.3    |
| <i>SOX2*</i>    | CATGAAGGAGCACCCGATTA   | CGGGCAGCGTGTACTTATCC   | NM_003106.2    |
| <i>SYN1</i>     | GCAAGGACGGAAGGGATCA    | TGTCTTCATCTGGTGGTCAC   | NM_133499.2    |
| <i>SYP</i>      | ACATGCAAGGAGCTGAGAGAC  | CAGAGCACAGGTTCAAGAA    | NM_003179.2    |
| <i>TBR1</i>     | ACGAACAACAAAGGAGCTTCA  | TGGTACTTGTGCAAGGACTGTA | NM_006593.2    |
| <i>TH</i>       | GATTGCTGAGATCGCCTTCC   | ATCTCCTCGGCGGTGTAC     | NM_000360.3    |
| <i>TUBB3</i>    | GAGCGGATCAGCGTCTACTA   | GGTCCAGGTCCACCAGAA     | NM_006086.2    |

\* Primers designed in the same exon.

**Supplementary References**

61. Bellugi, U., Lichtenberger, L., Jones, W., Lai, Z. & St George, M. I. The neurocognitive profile of Williams Syndrome: a complex pattern of strengths and weaknesses. *J Cogn Neurosci* **12 Suppl 1**, 7-29 (2000).
62. Jarvinen-Pasley, A. et al. Defining the social phenotype in Williams syndrome: a model for linking gene, the brain, and behavior. *Dev Psychopathol* **20**, 1-35 (2008).
63. Mervis, C.B. & John, A.E. Cognitive and behavioral characteristics of children with Williams syndrome: implications for intervention approaches. *Am J Med Genet C Semin Med Genet* **154C**, 229-248 (2010).
64. Meyer-Lindenberg, A. et al. Neural basis of genetically determined visuospatial construction deficit in Williams syndrome. *Neuron* **43**, 623-631 (2004).
65. Searcy, Y.M. et al. The relationship between age and IQ in adults with Williams syndrome. *Am J Ment Retard* **109**, 231-236 (2004).
66. Doyle, T.F., Bellugi, U., Korenberg, J.R. & Graham, J. "Everybody in the world is my friend" hypersociability in young children with Williams syndrome. *American Journal of Medical Genetics Part A* **124A**, 263-273 (2004).
67. Haas, B.W. et al. Genetic Influences on Sociability: Heightened Amygdala Reactivity and Event-Related Responses to Positive Social Stimuli in Williams Syndrome. *J Neurosci* **29**, 1132-1139 (2009).
68. Meyer-Lindenberg, A. et al. Neural correlates of genetically abnormal social cognition in Williams syndrome. *Nat Neurosci* **8**, 991-993 (2005).
69. Meyer-Lindenberg, A., Mervis, C.B. & Berman, K.F. Neural mechanisms in Williams syndrome: a unique window to genetic influences on cognition and behaviour. *Nat Rev Neurosci* **7**, 380-393 (2006).
70. Klein-Tasman, B.P. & Mervis, C.B. Distinctive personality characteristics of 8-, 9-, and 10-year-olds with Williams syndrome. *Dev Neuropsychol* **23**, 269-290 (2003).
71. Wechsler, D. Wechsler abbreviated scale of intelligence. (Psychological Corporation, 1999).
72. Benton, A.L. Contributions to neuropsychological assessment : a clinical manual. (Oxford University Press, New York; 1983).
73. Beery, K.E. & Beery, N.A. The Beery-Buktenica Developmental Test of Visual-motor Integration: With Supplemental Developmental Tests of Visual Perception and Motor Coordination, and Stepping Stones Age Norms from Birth to Age Six: Administration, Scoring and Teaching Manual. (Perason, 2004).
74. Benton, A.L. Contributions to neuropsychological assessment : a clinical manual, Edn. 2nd. (Oxford University Press, New York; 1994).
75. Dunn, L.M. & Dunn, L.M. Examiner's manual for the PPVT-III peabody picture vocabulary test: Form IIIA and Form IIIB. (AGS, 1997).
76. Zitzer-Comfort, C., Doyle, T., Masataka, N., Korenberg, J. & Bellugi, U. Nature and nurture: Williams syndrome across cultures. *Developmental science* **10**, 755-762 (2007).
77. Jones, W. et al. II. Hypersociability in Williams Syndrome. *J Cogn Neurosci* **12 Suppl 1**, 30-46 (2000).
78. Reilly, J., Losh, M., Bellugi, U. & Wulfeck, B. "Frog, where are you?" Narratives in children with specific language impairment, early focal brain injury, and Williams syndrome. *Brain Lang* **88**, 229-247 (2004).

**Test battery**

|                                               | <b>Test</b>                                                          | <b>Reference(s)*</b> | <b>Purpose</b>                                                                                            |
|-----------------------------------------------|----------------------------------------------------------------------|----------------------|-----------------------------------------------------------------------------------------------------------|
| <b>1. Neurocognitive</b>                      |                                                                      |                      |                                                                                                           |
| Intelligence                                  | Wechsler Abbreviated Scale of Intelligence (WASI)                    | 71                   | Verbal, Performance, and Full-Scale IQ (VIQ, PIQ and FSIQ)                                                |
| Non-verbal ability                            | Judgment of Line Orientation Test (JLO)                              | 72                   | Visuospatial perception                                                                                   |
|                                               | Beery-Buktenica Developmental Test of Visual-Motor Integration (VMI) | 73                   | Visuomotor integration                                                                                    |
| Verbal ability                                | Benton Facial Recognition Test (BFRT)                                | 74                   | Unfamiliar face recognition                                                                               |
|                                               | Peabody Picture Vocabulary Test (PPVT-III)                           | 75                   | Receptive vocabulary                                                                                      |
| <b>2. Social behavior</b>                     |                                                                      |                      |                                                                                                           |
| Parental questionnaires of social functioning | Salk Institute Sociability Questionnaire (SISQ)                      | 62, 66, 76, 77       | Approachability, social-emotional behavior                                                                |
| Experimental measures                         | Naturalistic use of language - from narrative tasks                  | 62, 78               | Assessment of structural language capacities versus the use of language for social and affective purposes |

---

\*included in Supplementary references
